# Supplementary material for: Geographic and Genomic Distribution of SARS-CoV-2 Mutations
Source: Preprints.org preprint supplement (doi:10.20944/preprints202004.0529.v1), 2020-04-30
Supplement: Supplementary file 1 [file supplementary]

## Sheet: gisaid_annot
sample	refpos	refvar	qvar	qlength	qpos	protein	variant	varclass	annotation
EPI_ISL_415706	4	A	T	4	29903	5'UTR	4	extragenic	NA
EPI_ISL_415706	241	C	T	241	29903	5'UTR	241	extragenic	NA
EPI_ISL_415706	3037	C	T	3037	29903	NSP3	F106F	SNP_silent	Predicted phosphoesterase, papain-like proteinase
EPI_ISL_415706	14408	C	T	14408	29903	NSP12b	P314L	SNP	RNA-dependent RNA polymerase, post-ribosomal frameshift
EPI_ISL_415706	15324	C	T	15324	29903	NSP12b	N619N	SNP_silent	RNA-dependent RNA polymerase, post-ribosomal frameshift
EPI_ISL_415706	23403	A	G	23403	29903	S	D614G	SNP	Spike
EPI_ISL_416497	4	A	T	4	29862	5'UTR	4	extragenic	NA
EPI_ISL_416497	241	C	T	241	29862	5'UTR	241	extragenic	NA
EPI_ISL_416497	2416	C	T	2416	29862	NSP2	Y537Y	SNP_silent	Non-Structural protein 2
EPI_ISL_416497	3037	C	T	3037	29862	NSP3	F106F	SNP_silent	Predicted phosphoesterase, papain-like proteinase
EPI_ISL_416497	12722	T	C	12722	29862	NSP9	S13P	SNP	ssRNA-binding protein
EPI_ISL_416497	14408	C	T	14408	29862	NSP12b	P314L	SNP	RNA-dependent RNA polymerase, post-ribosomal frameshift
EPI_ISL_416497	23403	A	G	23403	29862	S	D614G	SNP	Spike
EPI_ISL_416497	25563	G	T	25563	29862	ORF3a	Q57H	SNP	ORF3a protein
EPI_ISL_421670	4	A	G	4	29864	5'UTR	4	extragenic	NA
EPI_ISL_421670	884	C	T	884	29864	NSP2	R27C	SNP	Non-Structural protein 2
EPI_ISL_421670	1397	G	A	1397	29864	NSP2	V198I	SNP	Non-Structural protein 2
EPI_ISL_421670	6220	G	A	6220	29864	NSP3	L1167L	SNP_silent	Predicted phosphoesterase, papain-like proteinase
EPI_ISL_421670	8653	G	T	8653	29864	NSP4	M33I	SNP	Transmembrane protein
EPI_ISL_421670	10667	T	C	10667	29864	NSP5	V204V	SNP_silent	3C-like proteinase
EPI_ISL_421670	11083	G	T	11083	29864	NSP6	L37F	SNP	Transmembrane protein
EPI_ISL_421670	22792	C	A	22792	29864	S	I410I	SNP_silent	Spike
EPI_ISL_421670	28253	CA	AC	28253	29864	ORF8	FI120LL	SNP	ORF8 protein
EPI_ISL_421670	28688	T	C	28688	29864	N	A138A	SNP_silent	Nucleocapsid protein
EPI_ISL_421670	28913	G	T	28913	29864	N	G214C	SNP	Nucleocapsid protein
EPI_ISL_421670	29742	G	T	29742	29864	3'UTR	29742	extragenic	NA
EPI_ISL_413653	6	A	T	6	29903	5'UTR	6	extragenic	NA
EPI_ISL_413653	8782	C	T	8782	29903	NSP4	S76S	SNP_silent	Transmembrane protein
EPI_ISL_413653	17747	C	T	17747	29903	NSP13	P504L	SNP	Helicase
EPI_ISL_413653	17858	A	G	17858	29903	NSP13	Y541C	SNP	Helicase
EPI_ISL_413653	18060	C	T	18060	29903	NSP14	L7L	SNP_silent	3'-to-5' exonuclease
EPI_ISL_413653	28144	T	C	28144	29903	ORF8	L84S	SNP	ORF8 protein
EPI_ISL_424361	7	G	C	5	29868	5'UTR	7	extragenic	NA
EPI_ISL_424361	884	C	T	882	29868	NSP2	R27C	SNP	Non-Structural protein 2
EPI_ISL_424361	1397	G	A	1395	29868	NSP2	V198I	SNP	Non-Structural protein 2
EPI_ISL_424361	8653	G	T	8651	29868	NSP4	M33I	SNP	Transmembrane protein
EPI_ISL_424361	11083	G	T	11081	29868	NSP6	L37F	SNP	Transmembrane protein
EPI_ISL_424361	27613	G	T	27611	29868	ORF7a	V74F	SNP	ORF7a protein
EPI_ISL_424361	28688	T	C	28686	29868	N	A138A	SNP_silent	Nucleocapsid protein
EPI_ISL_424361	29296	C	T	29294	29868	N	D341D	SNP_silent	Nucleocapsid protein
EPI_ISL_424361	29742	G	T	29740	29868	3'UTR	29742	extragenic	NA
EPI_ISL_417201	8	G	A	4	29865	5'UTR	8	extragenic	NA
EPI_ISL_417201	8782	C	T	8778	29865	NSP4	S76S	SNP_silent	Transmembrane protein
EPI_ISL_417201	16381	G	A	16377	29865	NSP13	V49I	SNP	Helicase
EPI_ISL_417201	17877	T	C	17873	29865	NSP13	T547T	SNP_silent	Helicase
EPI_ISL_417201	20316	C	T	20312	29865	NSP15	F232F	SNP_silent	endoRNAse
EPI_ISL_417201	25500	G	T	25496	29865	ORF3a	P36P	SNP_silent	ORF3a protein
EPI_ISL_417201	26211	G	T	26207	29865	ORF3a	V273V	SNP_silent	ORF3a protein
EPI_ISL_417201	28144	T	C	28140	29865	ORF8	L84S	SNP	ORF8 protein
EPI_ISL_417201	28878	G	A	28874	29865	N	S202N	SNP	Nucleocapsid protein
EPI_ISL_417201	29742	G	A	29738	29865	3'UTR	29742	extragenic	NA
EPI_ISL_416664	10	T	A	7	29897	5'UTR	10	extragenic	NA
EPI_ISL_416664	8782	C	T	8779	29897	NSP4	S76S	SNP_silent	Transmembrane protein
EPI_ISL_416664	11704	C	T	11701	29897	NSP6	Y244Y	SNP_silent	Transmembrane protein
EPI_ISL_416664	17747	C	T	17744	29897	NSP13	P504L	SNP	Helicase
EPI_ISL_416664	17858	A	G	17855	29897	NSP13	Y541C	SNP	Helicase
EPI_ISL_416664	18060	C	T	18057	29897	NSP14	L7L	SNP_silent	3'-to-5' exonuclease
EPI_ISL_416664	19961	C	T	19958	29897	NSP15	T114M	SNP	endoRNAse
EPI_ISL_416664	28144	T	C	28141	29897	ORF8	L84S	SNP	ORF8 protein
EPI_ISL_421641	10	T	G	6	29864	5'UTR	10	extragenic	NA
EPI_ISL_421641	13	T	A	9	29864	5'UTR	13	extragenic	NA
EPI_ISL_421641	33	C	A	29	29864	5'UTR	33	extragenic	NA
EPI_ISL_421641	241	C	T	237	29864	5'UTR	241	extragenic	NA
EPI_ISL_421641	3037	C	T	3033	29864	NSP3	F106F	SNP_silent	Predicted phosphoesterase, papain-like proteinase
EPI_ISL_421641	11272	G	T	11268	29864	NSP6	M100I	SNP	Transmembrane protein
EPI_ISL_421641	14408	C	T	14404	29864	NSP12b	P314L	SNP	RNA-dependent RNA polymerase, post-ribosomal frameshift
EPI_ISL_421641	14585	C	T	14581	29864	NSP12b	A373V	SNP	RNA-dependent RNA polymerase, post-ribosomal frameshift
EPI_ISL_421641	23403	A	G	23399	29864	S	D614G	SNP	Spike
EPI_ISL_421641	29845	TT	GA	29841	29864	3'UTR	29845	extragenic	NA
EPI_ISL_423473	10	T	C	10	29903	5'UTR	10	extragenic	NA
EPI_ISL_423473	241	C	T	241	29903	5'UTR	241	extragenic	NA
EPI_ISL_423473	3037	C	T	3037	29903	NSP3	F106F	SNP_silent	Predicted phosphoesterase, papain-like proteinase
EPI_ISL_423473	14408	C	T	14408	29903	NSP12b	P314L	SNP	RNA-dependent RNA polymerase, post-ribosomal frameshift
EPI_ISL_423473	23403	A	G	23403	29903	S	D614G	SNP	Spike
EPI_ISL_423473	27046	C	T	27046	29903	M	T175M	SNP	Membrane
EPI_ISL_423473	28881	GGG	AAC	28881	29903	N	RG203KR	SNP	Nucleocapsid protein
EPI_ISL_427230	10	T	A	10	29901	5'UTR	10	extragenic	NA
EPI_ISL_427230	13	T	A	13	29901	5'UTR	13	extragenic	NA
EPI_ISL_427230	241	C	T	241	29901	5'UTR	241	extragenic	NA
EPI_ISL_427230	1059	C	T	1059	29901	NSP2	T85I	SNP	Non-Structural protein 2
EPI_ISL_427230	3037	C	T	3037	29901	NSP3	F106F	SNP_silent	Predicted phosphoesterase, papain-like proteinase
EPI_ISL_427230	14408	C	T	14408	29901	NSP12b	P314L	SNP	RNA-dependent RNA polymerase, post-ribosomal frameshift
EPI_ISL_427230	21146	T	A	21146	29901	NSP16	L163H	SNP	2'-O-ribose methyltransferase
EPI_ISL_427230	23403	A	G	23403	29901	S	D614G	SNP	Spike
EPI_ISL_427230	24904	C	T	24904	29901	S	I1114I	SNP_silent	Spike
EPI_ISL_427230	25563	G	T	25563	29901	ORF3a	Q57H	SNP	ORF3a protein
EPI_ISL_427230	29553	G	A	29553	29901	3'UTR	29553	extragenic	NA
EPI_ISL_422453	11	T	C	11	29903	5'UTR	11	extragenic	NA
EPI_ISL_422453	13	T	C	13	29903	5'UTR	13	extragenic	NA
EPI_ISL_422453	241	C	T	241	29903	5'UTR	241	extragenic	NA
EPI_ISL_422453	1059	C	T	1059	29903	NSP2	T85I	SNP	Non-Structural protein 2
EPI_ISL_422453	3037	C	T	3037	29903	NSP3	F106F	SNP_silent	Predicted phosphoesterase, papain-like proteinase
EPI_ISL_422453	14408	C	T	14408	29903	NSP12b	P314L	SNP	RNA-dependent RNA polymerase, post-ribosomal frameshift
EPI_ISL_422453	23403	A	G	23403	29903	S	D614G	SNP	Spike
EPI_ISL_422453	23731	C	T	23731	29903	S	T723T	SNP_silent	Spike
EPI_ISL_422453	25563	G	T	25563	29903	ORF3a	Q57H	SNP	ORF3a protein
EPI_ISL_414627	13	T	A	7	29897	5'UTR	13	extragenic	NA
EPI_ISL_414627	45	G	C	39	29897	5'UTR	45	extragenic	NA
EPI_ISL_414627	241	C	T	235	29897	5'UTR	241	extragenic	NA
EPI_ISL_414627	1059	C	T	1053	29897	NSP2	T85I	SNP	Non-Structural protein 2
EPI_ISL_414627	3037	C	T	3031	29897	NSP3	F106F	SNP_silent	Predicted phosphoesterase, papain-like proteinase
EPI_ISL_414627	14408	C	T	14402	29897	NSP12b	P314L	SNP	RNA-dependent RNA polymerase, post-ribosomal frameshift
EPI_ISL_414627	23403	A	G	23397	29897	S	D614G	SNP	Spike
EPI_ISL_414627	25563	G	T	25557	29897	ORF3a	Q57H	SNP	ORF3a protein
EPI_ISL_414637	13	T	A	13	29903	5'UTR	13	extragenic	NA
EPI_ISL_414637	241	C	T	241	29903	5'UTR	241	extragenic	NA
EPI_ISL_414637	2416	C	T	2416	29903	NSP2	Y537Y	SNP_silent	Non-Structural protein 2
EPI_ISL_414637	3037	C	T	3037	29903	NSP3	F106F	SNP_silent	Predicted phosphoesterase, papain-like proteinase
EPI_ISL_414637	14408	C	T	14408	29903	NSP12b	P314L	SNP	RNA-dependent RNA polymerase, post-ribosomal frameshift
EPI_ISL_414637	19884	C	T	19884	29903	NSP15	Y88Y	SNP_silent	endoRNAse
EPI_ISL_414637	23403	A	G	23403	29903	S	D614G	SNP	Spike
EPI_ISL_414637	25563	G	T	25563	29903	ORF3a	Q57H	SNP	ORF3a protein
EPI_ISL_420736	13	T	C	13	29903	5'UTR	13	extragenic	NA
EPI_ISL_420736	241	C	T	241	29903	5'UTR	241	extragenic	NA
EPI_ISL_420736	3037	C	T	3037	29903	NSP3	F106F	SNP_silent	Predicted phosphoesterase, papain-like proteinase
EPI_ISL_420736	14408	C	T	14408	29903	NSP12b	P314L	SNP	RNA-dependent RNA polymerase, post-ribosomal frameshift
EPI_ISL_420736	23403	A	G	23403	29903	S	D614G	SNP	Spike
EPI_ISL_420736	28881	GGG	AAC	28881	29903	N	RG203KR	SNP	Nucleocapsid protein
EPI_ISL_427250	13	T	C	12	29902	5'UTR	13	extragenic	NA
EPI_ISL_427250	35	AC	TT	34	29902	5'UTR	35	extragenic	NA
EPI_ISL_427250	241	C	T	240	29902	5'UTR	241	extragenic	NA
EPI_ISL_427250	1059	C	T	1058	29902	NSP2	T85I	SNP	Non-Structural protein 2
EPI_ISL_427250	3037	C	T	3036	29902	NSP3	F106F	SNP_silent	Predicted phosphoesterase, papain-like proteinase
EPI_ISL_427250	14408	C	T	14407	29902	NSP12b	P314L	SNP	RNA-dependent RNA polymerase, post-ribosomal frameshift
EPI_ISL_427250	19263	C	T	19262	29902	NSP14	N408N	SNP_silent	3'-to-5' exonuclease
EPI_ISL_427250	23403	A	G	23402	29902	S	D614G	SNP	Spike
EPI_ISL_427250	25563	G	T	25562	29902	ORF3a	Q57H	SNP	ORF3a protein
EPI_ISL_427250	29445	C	T	29444	29902	N	T391I	SNP	Nucleocapsid protein
EPI_ISL_427470	13	T	C	13	29903	5'UTR	13	extragenic	NA
EPI_ISL_427470	241	C	T	241	29903	5'UTR	241	extragenic	NA
EPI_ISL_427470	1059	C	T	1059	29903	NSP2	T85I	SNP	Non-Structural protein 2
EPI_ISL_427470	3037	C	T	3037	29903	NSP3	F106F	SNP_silent	Predicted phosphoesterase, papain-like proteinase
EPI_ISL_427470	8078	C	T	8078	29903	NSP3	P1787S	SNP	Predicted phosphoesterase, papain-like proteinase
EPI_ISL_427470	14408	C	T	14408	29903	NSP12b	P314L	SNP	RNA-dependent RNA polymerase, post-ribosomal frameshift
EPI_ISL_427470	19521	T	C	19521	29903	NSP14	Y494Y	SNP_silent	3'-to-5' exonuclease
EPI_ISL_427470	23403	A	G	23403	29903	S	D614G	SNP	Spike
EPI_ISL_427470	25563	G	T	25563	29903	ORF3a	Q57H	SNP	ORF3a protein
EPI_ISL_427470	28615	A	G	28615	29903	N	G114G	SNP_silent	Nucleocapsid protein
EPI_ISL_420569	15	C	T	15	29903	5'UTR	15	extragenic	NA
EPI_ISL_420569	241	C	T	241	29903	5'UTR	241	extragenic	NA
EPI_ISL_420569	3037	C	T	3037	29903	NSP3	F106F	SNP_silent	Predicted phosphoesterase, papain-like proteinase
EPI_ISL_420569	14408	C	T	14408	29903	NSP12b	P314L	SNP	RNA-dependent RNA polymerase, post-ribosomal frameshift
EPI_ISL_420569	23403	A	G	23403	29903	S	D614G	SNP	Spike
EPI_ISL_420569	28881	GGG	AAC	28881	29903	N	RG203KR	SNP	Nucleocapsid protein
EPI_ISL_414624	18	T	C	18	29903	5'UTR	18	extragenic	NA
EPI_ISL_414624	187	A	G	187	29903	5'UTR	187	extragenic	NA
EPI_ISL_414624	241	C	T	241	29903	5'UTR	241	extragenic	NA
EPI_ISL_414624	3037	C	T	3037	29903	NSP3	F106F	SNP_silent	Predicted phosphoesterase, papain-like proteinase
EPI_ISL_414624	10728	C	T	10728	29903	NSP5	T225I	SNP	3C-like proteinase
EPI_ISL_414624	14408	C	T	14408	29903	NSP12b	P314L	SNP	RNA-dependent RNA polymerase, post-ribosomal frameshift
EPI_ISL_414624	23403	A	G	23403	29903	S	D614G	SNP	Spike
EPI_ISL_414634	18	T	C	18	29902	5'UTR	18	extragenic	NA
EPI_ISL_414634	26	A	.	25	29902	5'UTR	26	extragenic	NA
EPI_ISL_414634	28	C	T	27	29902	5'UTR	28	extragenic	NA
EPI_ISL_414634	241	C	T	240	29902	5'UTR	241	extragenic	NA
EPI_ISL_414634	1059	C	T	1058	29902	NSP2	T85I	SNP	Non-Structural protein 2
EPI_ISL_414634	3037	C	T	3036	29902	NSP3	F106F	SNP_silent	Predicted phosphoesterase, papain-like proteinase
EPI_ISL_414634	5348	C	T	5347	29902	NSP3	A876A	SNP_silent	Predicted phosphoesterase, papain-like proteinase
EPI_ISL_414634	8651	A	G	8650	29902	NSP4	M33V	SNP	Transmembrane protein
EPI_ISL_414634	14408	C	T	14407	29902	NSP12b	P314L	SNP	RNA-dependent RNA polymerase, post-ribosomal frameshift
EPI_ISL_414634	23403	A	G	23402	29902	S	D614G	SNP	Spike
EPI_ISL_414634	25046	C	G	25045	29902	S	P1162A	SNP	Spike
EPI_ISL_414634	25563	G	T	25562	29902	ORF3a	Q57H	SNP	ORF3a protein
EPI_ISL_414634	29866	A	C	29865	29902	3'UTR	29866	extragenic	NA
EPI_ISL_417563	19	C	T	19	29903	5'UTR	19	extragenic	NA
EPI_ISL_417563	241	C	T	241	29903	5'UTR	241	extragenic	NA
EPI_ISL_417563	3037	C	T	3037	29903	NSP3	F106F	SNP_silent	Predicted phosphoesterase, papain-like proteinase
EPI_ISL_417563	4276	C	T	4276	29903	NSP3	Y519Y	SNP_silent	Predicted phosphoesterase, papain-like proteinase
EPI_ISL_417563	13377	C	A	13377	29903	NSP10	T118N	SNP	Growth-factor-like protein
EPI_ISL_417563	14408	C	T	14408	29903	NSP12b	P314L	SNP	RNA-dependent RNA polymerase, post-ribosomal frameshift
EPI_ISL_417563	23403	A	G	23403	29903	S	D614G	SNP	Spike
EPI_ISL_417563	26530	A	G	26530	29903	M	D3G	SNP	Membrane
EPI_ISL_413559	21	C	T	21	29903	5'UTR	21	extragenic	NA
EPI_ISL_413559	9924	C	T	9924	29903	NSP4	A457V	SNP	Transmembrane protein
EPI_ISL_413559	9951	C	T	9951	29903	NSP4	A466V	SNP	Transmembrane protein
EPI_ISL_417280	21	C	T	21	29903	5'UTR	21	extragenic	NA
EPI_ISL_417280	1515	A	G	1515	29903	NSP2	H237R	SNP	Non-Structural protein 2
EPI_ISL_417280	9223	C	T	9223	29903	NSP4	H223H	SNP_silent	Transmembrane protein
EPI_ISL_417280	11083	G	T	11083	29903	NSP6	L37F	SNP	Transmembrane protein
EPI_ISL_417280	14805	C	T	14805	29903	NSP12b	Y446Y	SNP_silent	RNA-dependent RNA polymerase, post-ribosomal frameshift
EPI_ISL_417280	17247	T	C	17247	29903	NSP13	R337R	SNP_silent	Helicase
EPI_ISL_417280	26144	G	T	26144	29903	ORF3a	G251V	SNP	ORF3a protein
EPI_ISL_419757	21	C	T	20	29902	5'UTR	21	extragenic	NA
EPI_ISL_419757	241	C	T	240	29902	5'UTR	241	extragenic	NA
EPI_ISL_419757	1059	C	T	1058	29902	NSP2	T85I	SNP	Non-Structural protein 2
EPI_ISL_419757	3037	C	T	3036	29902	NSP3	F106F	SNP_silent	Predicted phosphoesterase, papain-like proteinase
EPI_ISL_419757	4015	A	G	4014	29902	NSP3	T432T	SNP_silent	Predicted phosphoesterase, papain-like proteinase
EPI_ISL_419757	4951	G	A	4950	29902	NSP3	L744L	SNP_silent	Predicted phosphoesterase, papain-like proteinase
EPI_ISL_419757	14408	C	T	14407	29902	NSP12b	P314L	SNP	RNA-dependent RNA polymerase, post-ribosomal frameshift
EPI_ISL_419757	23403	A	G	23402	29902	S	D614G	SNP	Spike
EPI_ISL_419757	25563	G	T	25562	29902	ORF3a	Q57H	SNP	ORF3a protein
EPI_ISL_419772	21	C	T	17	29899	5'UTR	21	extragenic	NA
EPI_ISL_419772	7007	G	A	7003	29899	NSP3	A1430T	SNP	Predicted phosphoesterase, papain-like proteinase
EPI_ISL_419772	8782	C	T	8778	29899	NSP4	S76S	SNP_silent	Transmembrane protein
EPI_ISL_419772	18180	G	A	18176	29899	NSP14	K47K	SNP_silent	3'-to-5' exonuclease
EPI_ISL_419772	26088	C	T	26084	29899	ORF3a	I232I	SNP_silent	ORF3a protein
EPI_ISL_419772	28144	T	C	28140	29899	ORF8	L84S	SNP	ORF8 protein
EPI_ISL_419772	28868	C	A	28864	29899	N	P199T	SNP	Nucleocapsid protein
EPI_ISL_421761	21	C	T	21	29860	5'UTR	21	extragenic	NA
EPI_ISL_421761	241	C	T	241	29860	5'UTR	241	extragenic	NA
EPI_ISL_421761	1059	C	T	1059	29860	NSP2	T85I	SNP	Non-Structural protein 2
EPI_ISL_421761	3037	C	T	3037	29860	NSP3	F106F	SNP_silent	Predicted phosphoesterase, papain-like proteinase
EPI_ISL_421761	11464	G	A	11464	29860	NSP6	M164I	SNP	Transmembrane protein
EPI_ISL_421761	14408	C	T	14408	29860	NSP12b	P314L	SNP	RNA-dependent RNA polymerase, post-ribosomal frameshift
EPI_ISL_421761	23403	A	G	23403	29860	S	D614G	SNP	Spike
EPI_ISL_421761	25563	G	T	25563	29860	ORF3a	Q57H	SNP	ORF3a protein
EPI_ISL_421792	21	C	T	21	29903	5'UTR	21	extragenic	NA
EPI_ISL_421792	241	C	T	241	29903	5'UTR	241	extragenic	NA
EPI_ISL_421792	3037	C	T	3037	29903	NSP3	F106F	SNP_silent	Predicted phosphoesterase, papain-like proteinase
EPI_ISL_421792	14408	C	T	14408	29903	NSP12b	P314L	SNP	RNA-dependent RNA polymerase, post-ribosomal frameshift
EPI_ISL_421792	23403	A	G	23403	29903	S	D614G	SNP	Spike
EPI_ISL_421792	28881	GGG	AAC	28881	29903	N	RG203KR	SNP	Nucleocapsid protein
EPI_ISL_423472	21	C	T	21	29903	5'UTR	21	extragenic	NA
EPI_ISL_423472	241	C	T	241	29903	5'UTR	241	extragenic	NA
EPI_ISL_423472	3037	C	T	3037	29903	NSP3	F106F	SNP_silent	Predicted phosphoesterase, papain-like proteinase
EPI_ISL_423472	4002	C	T	4002	29903	NSP3	T428I	SNP	Predicted phosphoesterase, papain-like proteinase
EPI_ISL_423472	10097	G	A	10097	29903	NSP5	G15S	SNP	3C-like proteinase
EPI_ISL_423472	13536	C	T	13536	29903	NSP12b	Y23Y	SNP_silent	RNA-dependent RNA polymerase, post-ribosomal frameshift
EPI_ISL_423472	14184	C	T	14184	29903	NSP12b	T239T	SNP_silent	RNA-dependent RNA polymerase, post-ribosomal frameshift
EPI_ISL_423472	14408	C	T	14408	29903	NSP12b	P314L	SNP	RNA-dependent RNA polymerase, post-ribosomal frameshift
EPI_ISL_423472	21058	C	T	21058	29903	NSP16	P134S	SNP	2'-O-ribose methyltransferase
EPI_ISL_423472	23403	A	G	23403	29903	S	D614G	SNP	Spike
EPI_ISL_423472	23731	C	T	23731	29903	S	T723T	SNP_silent	Spike
EPI_ISL_423472	28881	GGG	AAC	28881	29903	N	RG203KR	SNP	Nucleocapsid protein
EPI_ISL_423623	21	C	T	21	29903	5'UTR	21	extragenic	NA
EPI_ISL_423623	1515	A	G	1515	29903	NSP2	H237R	SNP	Non-Structural protein 2
EPI_ISL_423623	7675	G	T	7675	29903	NSP3	A1652A	SNP_silent	Predicted phosphoesterase, papain-like proteinase
EPI_ISL_423623	9223	C	T	9223	29903	NSP4	H223H	SNP_silent	Transmembrane protein
EPI_ISL_423623	11083	G	T	11083	29903	NSP6	L37F	SNP	Transmembrane protein
EPI_ISL_423623	14805	C	T	14805	29903	NSP12b	Y446Y	SNP_silent	RNA-dependent RNA polymerase, post-ribosomal frameshift
EPI_ISL_423623	17247	T	C	17247	29903	NSP13	R337R	SNP_silent	Helicase
EPI_ISL_423623	26144	G	T	26144	29903	ORF3a	G251V	SNP	ORF3a protein
EPI_ISL_423623	29347	C	T	29347	29903	N	D358D	SNP_silent	Nucleocapsid protein
EPI_ISL_423772	21	C	T	21	29903	5'UTR	21	extragenic	NA
EPI_ISL_423772	241	C	T	241	29903	5'UTR	241	extragenic	NA
EPI_ISL_423772	313	C	T	313	29903	NSP1	L16L	SNP_silent	Leader protein
EPI_ISL_423772	3037	C	T	3037	29903	NSP3	F106F	SNP_silent	Predicted phosphoesterase, papain-like proteinase
EPI_ISL_423772	10105	G	T	10105	29903	NSP5	M17I	SNP	3C-like proteinase
EPI_ISL_423772	11221	G	T	11221	29903	NSP6	M83I	SNP	Transmembrane protein
EPI_ISL_423772	14408	C	T	14408	29903	NSP12b	P314L	SNP	RNA-dependent RNA polymerase, post-ribosomal frameshift
EPI_ISL_423772	23403	A	G	23403	29903	S	D614G	SNP	Spike
EPI_ISL_423772	25904	C	T	25904	29903	ORF3a	S171L	SNP	ORF3a protein
EPI_ISL_423772	28881	GGG	AAC	28881	29903	N	RG203KR	SNP	Nucleocapsid protein
EPI_ISL_408668	26	A	.	25	29889	5'UTR	26	extragenic	NA
EPI_ISL_408668	28	C	T	27	29889	5'UTR	28	extragenic	NA
EPI_ISL_408668	8782	C	T	8781	29889	NSP4	S76S	SNP_silent	Transmembrane protein
EPI_ISL_408668	24034	C	T	24033	29889	S	N824N	SNP_silent	Spike
EPI_ISL_408668	26729	T	C	26728	29889	M	A69A	SNP_silent	Membrane
EPI_ISL_408668	28077	G	C	28076	29889	ORF8	V62L	SNP	ORF8 protein
EPI_ISL_408668	28144	T	C	28143	29889	ORF8	L84S	SNP	ORF8 protein
EPI_ISL_408668	29859	T	C	29858	29889	3'UTR	29859	extragenic	NA
EPI_ISL_408668	29862	G	C	29861	29889	3'UTR	29862	extragenic	NA
EPI_ISL_408668	29864	G	.	29862	29889	3'UTR	29864	extragenic	NA
EPI_ISL_408668	29867	T	A	29865	29889	3'UTR	29867	extragenic	NA
EPI_ISL_414636	26	A	.	25	29902	5'UTR	26	extragenic	NA
EPI_ISL_414636	28	C	T	27	29902	5'UTR	28	extragenic	NA
EPI_ISL_414636	105	G	T	104	29902	5'UTR	105	extragenic	NA
EPI_ISL_414636	241	C	T	240	29902	5'UTR	241	extragenic	NA
EPI_ISL_414636	1059	C	T	1058	29902	NSP2	T85I	SNP	Non-Structural protein 2
EPI_ISL_414636	3037	C	T	3036	29902	NSP3	F106F	SNP_silent	Predicted phosphoesterase, papain-like proteinase
EPI_ISL_414636	14408	C	T	14407	29902	NSP12b	P314L	SNP	RNA-dependent RNA polymerase, post-ribosomal frameshift
EPI_ISL_414636	15213	A	G	15212	29902	NSP12b	T582T	SNP_silent	RNA-dependent RNA polymerase, post-ribosomal frameshift
EPI_ISL_414636	20766	A	G	20765	29902	NSP16	L36L	SNP_silent	2'-O-ribose methyltransferase
EPI_ISL_414636	23403	A	G	23402	29902	S	D614G	SNP	Spike
EPI_ISL_414636	25563	G	T	25562	29902	ORF3a	Q57H	SNP	ORF3a protein
EPI_ISL_414636	26199	G	T	26198	29902	ORF3a	T269T	SNP_silent	ORF3a protein
EPI_ISL_416427	26	A	.	25	29889	5'UTR	26	extragenic	NA
EPI_ISL_416427	28	C	T	27	29889	5'UTR	28	extragenic	NA
EPI_ISL_416427	8782	C	T	8781	29889	NSP4	S76S	SNP_silent	Transmembrane protein
EPI_ISL_416427	24034	C	T	24033	29889	S	N824N	SNP_silent	Spike
EPI_ISL_416427	26729	T	C	26728	29889	M	A69A	SNP_silent	Membrane
EPI_ISL_416427	28077	G	C	28076	29889	ORF8	V62L	SNP	ORF8 protein
EPI_ISL_416427	28144	T	C	28143	29889	ORF8	L84S	SNP	ORF8 protein
EPI_ISL_416427	29859	T	C	29858	29889	3'UTR	29859	extragenic	NA
EPI_ISL_416427	29862	G	C	29861	29889	3'UTR	29862	extragenic	NA
EPI_ISL_416427	29864	G	.	29862	29889	3'UTR	29864	extragenic	NA
EPI_ISL_416427	29867	T	A	29865	29889	3'UTR	29867	extragenic	NA
EPI_ISL_418267	26	A	.	25	29890	5'UTR	26	extragenic	NA
EPI_ISL_418267	28	C	T	27	29890	5'UTR	28	extragenic	NA
EPI_ISL_418267	10232	C	T	10231	29890	NSP5	R60C	SNP	3C-like proteinase
EPI_ISL_424993	28	C	T	27	29679	5'UTR	28	extragenic	NA
EPI_ISL_424993	41	T	C	40	29679	5'UTR	41	extragenic	NA
EPI_ISL_424993	51	T	C	50	29679	5'UTR	51	extragenic	NA
EPI_ISL_424993	241	C	T	240	29679	5'UTR	241	extragenic	NA
EPI_ISL_424993	618	A	G	617	29679	NSP1	Y118C	SNP	Leader protein
EPI_ISL_424993	3037	C	T	3036	29679	NSP3	F106F	SNP_silent	Predicted phosphoesterase, papain-like proteinase
EPI_ISL_424993	14408	C	T	14407	29679	NSP12b	P314L	SNP	RNA-dependent RNA polymerase, post-ribosomal frameshift
EPI_ISL_424993	15324	C	T	15323	29679	NSP12b	N619N	SNP_silent	RNA-dependent RNA polymerase, post-ribosomal frameshift
EPI_ISL_424993	21880	TGG	.	21878	29679	S	G107	deletion	Spike
EPI_ISL_424993	23403	A	G	23399	29679	S	D614G	SNP	Spike
EPI_ISL_424993	24025	A	G	24021	29679	S	L821L	SNP_silent	Spike
EPI_ISL_404227	31	A	G	12	29839	5'UTR	31	extragenic	NA
EPI_ISL_404227	583	C	T	564	29839	NSP1	V106V	SNP_silent	Leader protein
EPI_ISL_426052	31	A	T	9	29889	5'UTR	31	extragenic	NA
EPI_ISL_426052	36	C	T	14	29889	5'UTR	36	extragenic	NA
EPI_ISL_426052	241	C	T	219	29889	5'UTR	241	extragenic	NA
EPI_ISL_426052	1059	C	T	1037	29889	NSP2	T85I	SNP	Non-Structural protein 2
EPI_ISL_426052	3037	C	T	3015	29889	NSP3	F106F	SNP_silent	Predicted phosphoesterase, papain-like proteinase
EPI_ISL_426052	10851	C	T	10829	29889	NSP5	A266V	SNP	3C-like proteinase
EPI_ISL_426052	14408	C	T	14386	29889	NSP12b	P314L	SNP	RNA-dependent RNA polymerase, post-ribosomal frameshift
EPI_ISL_426052	23403	A	G	23381	29889	S	D614G	SNP	Spike
EPI_ISL_426052	25563	G	T	25541	29889	ORF3a	Q57H	SNP	ORF3a protein
EPI_ISL_426053	31	A	T	25	29904	5'UTR	31	extragenic	NA
EPI_ISL_426053	36	C	T	30	29904	5'UTR	36	extragenic	NA
EPI_ISL_426053	241	C	T	235	29904	5'UTR	241	extragenic	NA
EPI_ISL_426053	1059	C	T	1053	29904	NSP2	T85I	SNP	Non-Structural protein 2
EPI_ISL_426053	3037	C	T	3031	29904	NSP3	F106F	SNP_silent	Predicted phosphoesterase, papain-like proteinase
EPI_ISL_426053	3140	C	T	3134	29904	NSP3	P141S	SNP	Predicted phosphoesterase, papain-like proteinase
EPI_ISL_426053	9995	T	G	9989	29904	NSP4	S481A	SNP	Transmembrane protein
EPI_ISL_426053	14408	C	T	14402	29904	NSP12b	P314L	SNP	RNA-dependent RNA polymerase, post-ribosomal frameshift
EPI_ISL_426053	16260	C	T	16254	29904	NSP13	C8C	SNP_silent	Helicase
EPI_ISL_426053	23403	A	G	23397	29904	S	D614G	SNP	Spike
EPI_ISL_426053	25563	G	T	25557	29904	ORF3a	Q57H	SNP	ORF3a protein
EPI_ISL_426053	28821	C	A	28815	29904	N	S183Y	SNP	Nucleocapsid protein
EPI_ISL_426055	31	A	T	21	29907	5'UTR	31	extragenic	NA
EPI_ISL_426055	34	AAC	TTT	24	29907	5'UTR	34	extragenic	NA
EPI_ISL_426055	241	C	T	231	29907	5'UTR	241	extragenic	NA
EPI_ISL_426055	1059	C	T	1049	29907	NSP2	T85I	SNP	Non-Structural protein 2
EPI_ISL_426055	3037	C	T	3027	29907	NSP3	F106F	SNP_silent	Predicted phosphoesterase, papain-like proteinase
EPI_ISL_426055	11916	C	T	11906	29907	NSP7	S25L	SNP	Non-Structural Protein 7
EPI_ISL_426055	13515	C	T	13505	29907	NSP12b	G16G	SNP_silent	RNA-dependent RNA polymerase, post-ribosomal frameshift
EPI_ISL_426055	14408	C	T	14398	29907	NSP12b	P314L	SNP	RNA-dependent RNA polymerase, post-ribosomal frameshift
EPI_ISL_426055	18998	C	T	18988	29907	NSP14	A320V	SNP	3'-to-5' exonuclease
EPI_ISL_426055	23403	A	G	23393	29907	S	D614G	SNP	Spike
EPI_ISL_426055	25563	G	T	25553	29907	ORF3a	Q57H	SNP	ORF3a protein
EPI_ISL_426055	29540	G	A	29530	29907	3'UTR	29540	extragenic	NA
EPI_ISL_426068	31	A	T	31	29903	5'UTR	31	extragenic	NA
EPI_ISL_426068	36	C	T	36	29903	5'UTR	36	extragenic	NA
EPI_ISL_426068	241	C	T	241	29903	5'UTR	241	extragenic	NA
EPI_ISL_426068	1059	C	T	1059	29903	NSP2	T85I	SNP	Non-Structural protein 2
EPI_ISL_426068	3037	C	T	3037	29903	NSP3	F106F	SNP_silent	Predicted phosphoesterase, papain-like proteinase
EPI_ISL_426068	11289	C	T	11289	29903	NSP6	S106F	SNP	Transmembrane protein
EPI_ISL_426068	13170	C	T	13170	29903	NSP10	T49I	SNP	Growth-factor-like protein
EPI_ISL_426068	14407	CC	TT	14407	29903	NSP12b	P314F	SNP	RNA-dependent RNA polymerase, post-ribosomal frameshift
EPI_ISL_426068	23403	A	G	23403	29903	S	D614G	SNP	Spike
EPI_ISL_426068	25563	G	T	25563	29903	ORF3a	Q57H	SNP	ORF3a protein
EPI_ISL_426073	31	A	T	4	29876	5'UTR	31	extragenic	NA
EPI_ISL_426073	36	C	T	9	29876	5'UTR	36	extragenic	NA
EPI_ISL_426073	241	C	T	214	29876	5'UTR	241	extragenic	NA
EPI_ISL_426073	833	T	C	806	29876	NSP2	F10L	SNP	Non-Structural protein 2
EPI_ISL_426073	1059	C	T	1032	29876	NSP2	T85I	SNP	Non-Structural protein 2
EPI_ISL_426073	3037	C	T	3010	29876	NSP3	F106F	SNP_silent	Predicted phosphoesterase, papain-like proteinase
EPI_ISL_426073	14408	C	T	14381	29876	NSP12b	P314L	SNP	RNA-dependent RNA polymerase, post-ribosomal frameshift
EPI_ISL_426073	23403	A	G	23376	29876	S	D614G	SNP	Spike
EPI_ISL_426073	25563	G	T	25536	29876	ORF3a	Q57H	SNP	ORF3a protein
EPI_ISL_426073	27964	C	T	27937	29876	ORF8	S24L	SNP	ORF8 protein
EPI_ISL_426073	28093	C	T	28066	29876	ORF8	S67F	SNP	ORF8 protein
EPI_ISL_426073	29520	C	T	29493	29876	N	S416L	SNP	Nucleocapsid protein
EPI_ISL_426073	29864	G	A	29837	29876	3'UTR	29864	extragenic	NA
EPI_ISL_426073	29867	TG	AA	29840	29876	3'UTR	29867	extragenic	NA
EPI_ISL_426073	29870	C	A	29843	29876	3'UTR	29870	extragenic	NA
EPI_ISL_426075	31	A	T	10	29882	5'UTR	31	extragenic	NA
EPI_ISL_426075	36	C	T	15	29882	5'UTR	36	extragenic	NA
EPI_ISL_426075	241	C	T	220	29882	5'UTR	241	extragenic	NA
EPI_ISL_426075	3037	C	T	3016	29882	NSP3	F106F	SNP_silent	Predicted phosphoesterase, papain-like proteinase
EPI_ISL_426075	14408	C	T	14387	29882	NSP12b	P314L	SNP	RNA-dependent RNA polymerase, post-ribosomal frameshift
EPI_ISL_426075	20268	A	G	20247	29882	NSP15	L216L	SNP_silent	endoRNAse
EPI_ISL_426075	23403	A	G	23382	29882	S	D614G	SNP	Spike
EPI_ISL_426075	29867	TG	AA	29846	29882	3'UTR	29867	extragenic	NA
EPI_ISL_426075	29870	C	A	29849	29882	3'UTR	29870	extragenic	NA
EPI_ISL_426134	31	A	T	31	30031	5'UTR	31	extragenic	NA
EPI_ISL_426134	34	AAC	TTT	34	30031	5'UTR	34	extragenic	NA
EPI_ISL_426134	241	C	T	241	30031	5'UTR	241	extragenic	NA
EPI_ISL_426134	1059	C	T	1059	30031	NSP2	T85I	SNP	Non-Structural protein 2
EPI_ISL_426134	3037	C	T	3037	30031	NSP3	F106F	SNP_silent	Predicted phosphoesterase, papain-like proteinase
EPI_ISL_426134	14408	C	T	14408	30031	NSP12b	P314L	SNP	RNA-dependent RNA polymerase, post-ribosomal frameshift
EPI_ISL_426134	21575	C	T	21575	30031	S	L5F	SNP	Spike
EPI_ISL_426134	23403	A	G	23558	30031	S	D614G	SNP	Spike
EPI_ISL_426134	25563	G	T	25718	30031	ORF3a	Q57H	SNP	ORF3a protein
EPI_ISL_426134	29553	G	A	29708	30031	3'UTR	29553	extragenic	NA
EPI_ISL_427171	31	A	T	30	29902	5'UTR	31	extragenic	NA
EPI_ISL_427171	36	C	T	35	29902	5'UTR	36	extragenic	NA
EPI_ISL_427171	241	C	T	240	29902	5'UTR	241	extragenic	NA
EPI_ISL_427171	833	T	C	832	29902	NSP2	F10L	SNP	Non-Structural protein 2
EPI_ISL_427171	1059	C	T	1058	29902	NSP2	T85I	SNP	Non-Structural protein 2
EPI_ISL_427171	3037	C	T	3036	29902	NSP3	F106F	SNP_silent	Predicted phosphoesterase, papain-like proteinase
EPI_ISL_427171	14408	C	T	14407	29902	NSP12b	P314L	SNP	RNA-dependent RNA polymerase, post-ribosomal frameshift
EPI_ISL_427171	23403	A	G	23402	29902	S	D614G	SNP	Spike
EPI_ISL_427171	25563	G	T	25562	29902	ORF3a	Q57H	SNP	ORF3a protein
EPI_ISL_427171	27964	C	T	27963	29902	ORF8	S24L	SNP	ORF8 protein
EPI_ISL_427171	28159	A	G	28158	29902	ORF8	N89S	SNP	ORF8 protein
EPI_ISL_427171	29867	TG	AA	29866	29902	3'UTR	29867	extragenic	NA
EPI_ISL_427171	29870	C	A	29869	29902	3'UTR	29870	extragenic	NA
EPI_ISL_427187	31	A	T	25	29866	5'UTR	31	extragenic	NA
EPI_ISL_427187	36	C	T	30	29866	5'UTR	36	extragenic	NA
EPI_ISL_427187	3992	C	T	3986	29866	NSP3	T424T	SNP_silent	Predicted phosphoesterase, papain-like proteinase
EPI_ISL_427187	8782	C	T	8776	29866	NSP4	S76S	SNP_silent	Transmembrane protein
EPI_ISL_427187	17747	C	T	17741	29866	NSP13	P504L	SNP	Helicase
EPI_ISL_427187	17858	A	G	17852	29866	NSP13	Y541C	SNP	Helicase
EPI_ISL_427187	18060	C	T	18054	29866	NSP14	L7L	SNP_silent	3'-to-5' exonuclease
EPI_ISL_427187	22984	G	A	22978	29866	S	Q474Q	SNP_silent	Spike
EPI_ISL_427187	23992	A	T	23986	29866	S	S810S	SNP_silent	Spike
EPI_ISL_427187	27384	T	C	27378	29866	ORF6	D61D	SNP_silent	ORF6 protein
EPI_ISL_427187	28144	T	C	28138	29866	ORF8	L84S	SNP	ORF8 protein
EPI_ISL_427204	31	A	T	7	29844	5'UTR	31	extragenic	NA
EPI_ISL_427204	36	C	T	12	29844	5'UTR	36	extragenic	NA
EPI_ISL_427204	5784	C	T	5760	29844	NSP3	T1022I	SNP	Predicted phosphoesterase, papain-like proteinase
EPI_ISL_427204	8782	C	T	8758	29844	NSP4	S76S	SNP_silent	Transmembrane protein
EPI_ISL_427204	16957	G	T	16933	29844	NSP13	V241L	SNP	Helicase
EPI_ISL_427204	17747	C	T	17723	29844	NSP13	P504L	SNP	Helicase
EPI_ISL_427204	17858	A	G	17834	29844	NSP13	Y541C	SNP	Helicase
EPI_ISL_427204	18060	C	T	18036	29844	NSP14	L7L	SNP_silent	3'-to-5' exonuclease
EPI_ISL_427204	26730	G	A	26706	29844	M	V70I	SNP	Membrane
EPI_ISL_427204	28144	T	C	28120	29844	ORF8	L84S	SNP	ORF8 protein
EPI_ISL_427255	31	A	T	9	29854	5'UTR	31	extragenic	NA
EPI_ISL_427255	34	AAC	TTT	12	29854	5'UTR	34	extragenic	NA
EPI_ISL_427255	241	C	T	219	29854	5'UTR	241	extragenic	NA
EPI_ISL_427255	1059	C	T	1037	29854	NSP2	T85I	SNP	Non-Structural protein 2
EPI_ISL_427255	3037	C	T	3015	29854	NSP3	F106F	SNP_silent	Predicted phosphoesterase, papain-like proteinase
EPI_ISL_427255	12880	C	T	12858	29854	NSP9	I65I	SNP_silent	ssRNA-binding protein
EPI_ISL_427255	14408	C	T	14386	29854	NSP12b	P314L	SNP	RNA-dependent RNA polymerase, post-ribosomal frameshift
EPI_ISL_427255	23403	A	G	23381	29854	S	D614G	SNP	Spike
EPI_ISL_427255	25563	G	T	25541	29854	ORF3a	Q57H	SNP	ORF3a protein
EPI_ISL_427255	29553	G	A	29531	29854	3'UTR	29553	extragenic	NA
EPI_ISL_427257	31	A	T	21	29862	5'UTR	31	extragenic	NA
EPI_ISL_427257	34	AAC	TTT	24	29862	5'UTR	34	extragenic	NA
EPI_ISL_427257	241	C	T	231	29862	5'UTR	241	extragenic	NA
EPI_ISL_427257	1059	C	T	1049	29862	NSP2	T85I	SNP	Non-Structural protein 2
EPI_ISL_427257	3037	C	T	3027	29862	NSP3	F106F	SNP_silent	Predicted phosphoesterase, papain-like proteinase
EPI_ISL_427257	14408	C	T	14398	29862	NSP12b	P314L	SNP	RNA-dependent RNA polymerase, post-ribosomal frameshift
EPI_ISL_427257	23403	A	G	23393	29862	S	D614G	SNP	Spike
EPI_ISL_427257	25563	G	T	25553	29862	ORF3a	Q57H	SNP	ORF3a protein
EPI_ISL_427262	31	A	T	24	29872	5'UTR	31	extragenic	NA
EPI_ISL_427262	34	AAC	TTT	27	29872	5'UTR	34	extragenic	NA
EPI_ISL_427262	241	C	T	234	29872	5'UTR	241	extragenic	NA
EPI_ISL_427262	1059	C	T	1052	29872	NSP2	T85I	SNP	Non-Structural protein 2
EPI_ISL_427262	3037	C	T	3030	29872	NSP3	F106F	SNP_silent	Predicted phosphoesterase, papain-like proteinase
EPI_ISL_427262	14408	C	T	14401	29872	NSP12b	P314L	SNP	RNA-dependent RNA polymerase, post-ribosomal frameshift
EPI_ISL_427262	23403	A	G	23396	29872	S	D614G	SNP	Spike
EPI_ISL_427262	25563	G	T	25556	29872	ORF3a	Q57H	SNP	ORF3a protein
EPI_ISL_427264	31	A	T	30	29864	5'UTR	31	extragenic	NA
EPI_ISL_427264	34	AAC	TTT	33	29864	5'UTR	34	extragenic	NA
EPI_ISL_427264	241	C	T	240	29864	5'UTR	241	extragenic	NA
EPI_ISL_427264	684	TAAAGTCAT	.	682	29864	NSP1	K141	deletion	Leader protein
EPI_ISL_427264	3037	C	T	3027	29864	NSP3	F106F	SNP_silent	Predicted phosphoesterase, papain-like proteinase
EPI_ISL_427264	6636	C	T	6626	29864	NSP3	T1306I	SNP	Predicted phosphoesterase, papain-like proteinase
EPI_ISL_427264	14408	C	T	14398	29864	NSP12b	P314L	SNP	RNA-dependent RNA polymerase, post-ribosomal frameshift
EPI_ISL_427264	18877	C	T	18867	29864	NSP14	C279C	SNP_silent	3'-to-5' exonuclease
EPI_ISL_427264	21575	C	T	21565	29864	S	L5F	SNP	Spike
EPI_ISL_427264	23403	A	G	23393	29864	S	D614G	SNP	Spike
EPI_ISL_427264	25563	G	T	25553	29864	ORF3a	Q57H	SNP	ORF3a protein
EPI_ISL_417359	34	AACC	TTTA	31	29899	5'UTR	34	extragenic	NA
EPI_ISL_417359	241	C	T	238	29899	5'UTR	241	extragenic	NA
EPI_ISL_417359	1059	C	T	1056	29899	NSP2	T85I	SNP	Non-Structural protein 2
EPI_ISL_417359	3037	C	T	3034	29899	NSP3	F106F	SNP_silent	Predicted phosphoesterase, papain-like proteinase
EPI_ISL_417359	9511	T	C	9508	29899	NSP4	T319T	SNP_silent	Transmembrane protein
EPI_ISL_417359	14408	C	T	14405	29899	NSP12b	P314L	SNP	RNA-dependent RNA polymerase, post-ribosomal frameshift
EPI_ISL_417359	23403	A	G	23400	29899	S	D614G	SNP	Spike
EPI_ISL_417359	25563	G	T	25560	29899	ORF3a	Q57H	SNP	ORF3a protein
EPI_ISL_417454	34	AACC	TTTA	33	29900	5'UTR	34	extragenic	NA
EPI_ISL_417454	241	C	T	240	29900	5'UTR	241	extragenic	NA
EPI_ISL_417454	1059	C	T	1058	29900	NSP2	T85I	SNP	Non-Structural protein 2
EPI_ISL_417454	3037	C	T	3036	29900	NSP3	F106F	SNP_silent	Predicted phosphoesterase, papain-like proteinase
EPI_ISL_417454	14408	C	T	14407	29900	NSP12b	P314L	SNP	RNA-dependent RNA polymerase, post-ribosomal frameshift
EPI_ISL_417454	16912	G	T	16911	29900	NSP13	V226L	SNP	Helicase
EPI_ISL_417454	23403	A	G	23402	29900	S	D614G	SNP	Spike
EPI_ISL_417454	25563	G	T	25562	29900	ORF3a	Q57H	SNP	ORF3a protein
EPI_ISL_417454	29553	G	A	29552	29900	3'UTR	29553	extragenic	NA
EPI_ISL_418062	34	AAC	TTT	28	29894	5'UTR	34	extragenic	NA
EPI_ISL_418062	6424	A	C	6418	29894	NSP3	E1235D	SNP	Predicted phosphoesterase, papain-like proteinase
EPI_ISL_418062	8782	C	T	8776	29894	NSP4	S76S	SNP_silent	Transmembrane protein
EPI_ISL_418062	11042	G	T	11036	29894	NSP6	V24F	SNP	Transmembrane protein
EPI_ISL_418062	17747	C	T	17741	29894	NSP13	P504L	SNP	Helicase
EPI_ISL_418062	17858	A	G	17852	29894	NSP13	Y541C	SNP	Helicase
EPI_ISL_418062	18060	C	T	18054	29894	NSP14	L7L	SNP_silent	3'-to-5' exonuclease
EPI_ISL_418062	22207	T	C	22201	29894	S	D215D	SNP_silent	Spike
EPI_ISL_418062	24694	A	T	24688	29894	S	G1044G	SNP_silent	Spike
EPI_ISL_418062	28144	T	C	28138	29894	ORF8	L84S	SNP	ORF8 protein
EPI_ISL_418062	28283	A	G	28277	29894	N	N4D	SNP	Nucleocapsid protein
EPI_ISL_418064	34	AACC	CTTT	22	29864	5'UTR	34	extragenic	NA
EPI_ISL_418064	8782	C	T	8770	29864	NSP4	S76S	SNP_silent	Transmembrane protein
EPI_ISL_418064	15888	T	C	15876	29864	NSP12b	H807H	SNP_silent	RNA-dependent RNA polymerase, post-ribosomal frameshift
EPI_ISL_418064	17747	C	T	17735	29864	NSP13	P504L	SNP	Helicase
EPI_ISL_418064	17858	A	G	17846	29864	NSP13	Y541C	SNP	Helicase
EPI_ISL_418064	18060	C	T	18048	29864	NSP14	L7L	SNP_silent	3'-to-5' exonuclease
EPI_ISL_418064	28144	T	C	28132	29864	ORF8	L84S	SNP	ORF8 protein
EPI_ISL_418067	34	AACC	TTTA	17	29892	5'UTR	34	extragenic	NA
EPI_ISL_418067	241	C	T	224	29892	5'UTR	241	extragenic	NA
EPI_ISL_418067	1059	C	T	1042	29892	NSP2	T85I	SNP	Non-Structural protein 2
EPI_ISL_418067	3037	C	T	3020	29892	NSP3	F106F	SNP_silent	Predicted phosphoesterase, papain-like proteinase
EPI_ISL_418067	14408	C	T	14391	29892	NSP12b	P314L	SNP	RNA-dependent RNA polymerase, post-ribosomal frameshift
EPI_ISL_418067	23403	A	G	23386	29892	S	D614G	SNP	Spike
EPI_ISL_418067	25563	G	T	25546	29892	ORF3a	Q57H	SNP	ORF3a protein
EPI_ISL_418067	29553	G	A	29536	29892	3'UTR	29553	extragenic	NA
EPI_ISL_418867	34	AACC	TTTA	21	29900	5'UTR	34	extragenic	NA
EPI_ISL_418867	8782	C	T	8769	29900	NSP4	S76S	SNP_silent	Transmembrane protein
EPI_ISL_418867	17747	C	T	17734	29900	NSP13	P504L	SNP	Helicase
EPI_ISL_418867	17858	A	G	17845	29900	NSP13	Y541C	SNP	Helicase
EPI_ISL_418867	18060	C	T	18047	29900	NSP14	L7L	SNP_silent	3'-to-5' exonuclease
EPI_ISL_418867	28144	T	C	28131	29900	ORF8	L84S	SNP	ORF8 protein
EPI_ISL_418867	29866	A	T	29853	29900	3'UTR	29866	extragenic	NA
EPI_ISL_418867	29869	A	T	29856	29900	3'UTR	29869	extragenic	NA
EPI_ISL_418922	34	AACC	TTTA	16	29882	5'UTR	34	extragenic	NA
EPI_ISL_418922	6693	A	G	6675	29882	NSP3	K1325R	SNP	Predicted phosphoesterase, papain-like proteinase
EPI_ISL_418922	8782	C	T	8764	29882	NSP4	S76S	SNP_silent	Transmembrane protein
EPI_ISL_418922	14877	C	T	14859	29882	NSP12b	Y470Y	SNP_silent	RNA-dependent RNA polymerase, post-ribosomal frameshift
EPI_ISL_418922	17747	C	T	17729	29882	NSP13	P504L	SNP	Helicase
EPI_ISL_418922	17858	A	G	17840	29882	NSP13	Y541C	SNP	Helicase
EPI_ISL_418922	18060	C	T	18042	29882	NSP14	L7L	SNP_silent	3'-to-5' exonuclease
EPI_ISL_418922	28144	T	C	28126	29882	ORF8	L84S	SNP	ORF8 protein
EPI_ISL_418922	29188	A	T	29170	29882	N	A305A	SNP_silent	Nucleocapsid protein
EPI_ISL_418945	34	AAC	TTT	21	29881	5'UTR	34	extragenic	NA
EPI_ISL_418945	6693	A	G	6680	29881	NSP3	K1325R	SNP	Predicted phosphoesterase, papain-like proteinase
EPI_ISL_418945	8782	C	T	8769	29881	NSP4	S76S	SNP_silent	Transmembrane protein
EPI_ISL_418945	14877	C	T	14864	29881	NSP12b	Y470Y	SNP_silent	RNA-dependent RNA polymerase, post-ribosomal frameshift
EPI_ISL_418945	17747	C	T	17734	29881	NSP13	P504L	SNP	Helicase
EPI_ISL_418945	17858	A	G	17845	29881	NSP13	Y541C	SNP	Helicase
EPI_ISL_418945	18060	C	T	18047	29881	NSP14	L7L	SNP_silent	3'-to-5' exonuclease
EPI_ISL_418945	28144	T	C	28131	29881	ORF8	L84S	SNP	ORF8 protein
EPI_ISL_418945	29188	A	T	29175	29881	N	A305A	SNP_silent	Nucleocapsid protein
EPI_ISL_422964	34	AACC	TTTA	23	29890	5'UTR	34	extragenic	NA
EPI_ISL_422964	8782	C	T	8771	29890	NSP4	S76S	SNP_silent	Transmembrane protein
EPI_ISL_422964	12787	A	G	12776	29890	NSP9	T34T	SNP_silent	ssRNA-binding protein
EPI_ISL_422964	17747	C	T	17736	29890	NSP13	P504L	SNP	Helicase
EPI_ISL_422964	17858	A	G	17847	29890	NSP13	Y541C	SNP	Helicase
EPI_ISL_422964	18060	C	T	18049	29890	NSP14	L7L	SNP_silent	3'-to-5' exonuclease
EPI_ISL_422964	24694	A	T	24683	29890	S	G1044G	SNP_silent	Spike
EPI_ISL_422964	28144	T	C	28133	29890	ORF8	L84S	SNP	ORF8 protein
EPI_ISL_422964	28899	G	C	28888	29890	N	R209T	SNP	Nucleocapsid protein
EPI_ISL_423003	34	AACC	TTTA	26	29881	5'UTR	34	extragenic	NA
EPI_ISL_423003	8782	C	T	8774	29881	NSP4	S76S	SNP_silent	Transmembrane protein
EPI_ISL_423003	17747	C	T	17739	29881	NSP13	P504L	SNP	Helicase
EPI_ISL_423003	17858	A	G	17850	29881	NSP13	Y541C	SNP	Helicase
EPI_ISL_423003	18060	C	T	18052	29881	NSP14	L7L	SNP_silent	3'-to-5' exonuclease
EPI_ISL_423003	28144	T	C	28136	29881	ORF8	L84S	SNP	ORF8 protein
EPI_ISL_423005	34	AACC	TTTA	11	29852	5'UTR	34	extragenic	NA
EPI_ISL_423005	8602	G	A	8579	29852	NSP4	V16V	SNP_silent	Transmembrane protein
EPI_ISL_423005	8782	C	T	8759	29852	NSP4	S76S	SNP_silent	Transmembrane protein
EPI_ISL_423005	17747	C	T	17724	29852	NSP13	P504L	SNP	Helicase
EPI_ISL_423005	17858	A	G	17835	29852	NSP13	Y541C	SNP	Helicase
EPI_ISL_423005	18060	C	T	18037	29852	NSP14	L7L	SNP_silent	3'-to-5' exonuclease
EPI_ISL_423005	26152	G	A	26129	29852	ORF3a	G254R	SNP	ORF3a protein
EPI_ISL_423005	28144	T	C	28121	29852	ORF8	L84S	SNP	ORF8 protein
EPI_ISL_423010	34	AACC	TTTA	27	29896	5'UTR	34	extragenic	NA
EPI_ISL_423010	241	C	T	234	29896	5'UTR	241	extragenic	NA
EPI_ISL_423010	1059	C	T	1052	29896	NSP2	T85I	SNP	Non-Structural protein 2
EPI_ISL_423010	3037	C	T	3030	29896	NSP3	F106F	SNP_silent	Predicted phosphoesterase, papain-like proteinase
EPI_ISL_423010	14408	C	T	14401	29896	NSP12b	P314L	SNP	RNA-dependent RNA polymerase, post-ribosomal frameshift
EPI_ISL_423010	23403	A	G	23396	29896	S	D614G	SNP	Spike
EPI_ISL_423010	25563	G	T	25556	29896	ORF3a	Q57H	SNP	ORF3a protein
EPI_ISL_423010	29553	G	A	29546	29896	3'UTR	29553	extragenic	NA
EPI_ISL_424207	34	AAC	TTT	21	29888	5'UTR	34	extragenic	NA
EPI_ISL_424207	241	C	T	228	29888	5'UTR	241	extragenic	NA
EPI_ISL_424207	1059	C	T	1046	29888	NSP2	T85I	SNP	Non-Structural protein 2
EPI_ISL_424207	3037	C	T	3024	29888	NSP3	F106F	SNP_silent	Predicted phosphoesterase, papain-like proteinase
EPI_ISL_424207	7561	G	A	7548	29888	NSP3	R1614R	SNP_silent	Predicted phosphoesterase, papain-like proteinase
EPI_ISL_424207	14408	C	T	14395	29888	NSP12b	P314L	SNP	RNA-dependent RNA polymerase, post-ribosomal frameshift
EPI_ISL_424207	23403	A	G	23390	29888	S	D614G	SNP	Spike
EPI_ISL_424207	25563	G	T	25550	29888	ORF3a	Q57H	SNP	ORF3a protein
EPI_ISL_424207	28881	G	A	28868	29888	N	R203K	SNP	Nucleocapsid protein
EPI_ISL_424207	29866	A	G	29853	29888	3'UTR	29866	extragenic	NA
EPI_ISL_424207	29869	A	T	29856	29888	3'UTR	29869	extragenic	NA
EPI_ISL_424209	34	AACC	TTTA	12	29864	5'UTR	34	extragenic	NA
EPI_ISL_424209	1238	C	T	1216	29864	NSP2	H145Y	SNP	Non-Structural protein 2
EPI_ISL_424209	3593	C	T	3571	29864	NSP3	L292F	SNP	Predicted phosphoesterase, papain-like proteinase
EPI_ISL_424209	4683	C	T	4661	29864	NSP3	A655V	SNP	Predicted phosphoesterase, papain-like proteinase
EPI_ISL_424209	8782	C	T	8760	29864	NSP4	S76S	SNP_silent	Transmembrane protein
EPI_ISL_424209	17747	C	T	17725	29864	NSP13	P504L	SNP	Helicase
EPI_ISL_424209	17858	A	G	17836	29864	NSP13	Y541C	SNP	Helicase
EPI_ISL_424209	18060	C	T	18038	29864	NSP14	L7L	SNP_silent	3'-to-5' exonuclease
EPI_ISL_424209	27200	A	G	27178	29864	3'UTR	27200	extragenic	NA
EPI_ISL_424209	28144	T	C	28122	29864	ORF8	L84S	SNP	ORF8 protein
EPI_ISL_424209	28924	T	C	28902	29864	N	A217A	SNP_silent	Nucleocapsid protein
EPI_ISL_424253	34	AAC	TTT	15	29851	5'UTR	34	extragenic	NA
EPI_ISL_424253	241	C	T	222	29851	5'UTR	241	extragenic	NA
EPI_ISL_424253	3037	C	T	3018	29851	NSP3	F106F	SNP_silent	Predicted phosphoesterase, papain-like proteinase
EPI_ISL_424253	14408	C	T	14389	29851	NSP12b	P314L	SNP	RNA-dependent RNA polymerase, post-ribosomal frameshift
EPI_ISL_424253	18877	C	T	18858	29851	NSP14	C279C	SNP_silent	3'-to-5' exonuclease
EPI_ISL_424253	23403	A	G	23384	29851	S	D614G	SNP	Spike
EPI_ISL_424253	25563	G	T	25544	29851	ORF3a	Q57H	SNP	ORF3a protein
EPI_ISL_424261	34	AACC	TTTA	26	29859	5'UTR	34	extragenic	NA
EPI_ISL_424261	8782	C	T	8774	29859	NSP4	S76S	SNP_silent	Transmembrane protein
EPI_ISL_424261	17747	C	T	17739	29859	NSP13	P504L	SNP	Helicase
EPI_ISL_424261	17858	A	G	17850	29859	NSP13	Y541C	SNP	Helicase
EPI_ISL_424261	18060	C	T	18052	29859	NSP14	L7L	SNP_silent	3'-to-5' exonuclease
EPI_ISL_424261	22984	G	A	22976	29859	S	Q474Q	SNP_silent	Spike
EPI_ISL_424261	27384	T	C	27376	29859	ORF6	D61D	SNP_silent	ORF6 protein
EPI_ISL_424261	28144	T	C	28136	29859	ORF8	L84S	SNP	ORF8 protein
EPI_ISL_424296	34	AAC	TTT	12	29853	5'UTR	34	extragenic	NA
EPI_ISL_424296	8602	G	A	8580	29853	NSP4	V16V	SNP_silent	Transmembrane protein
EPI_ISL_424296	8782	C	T	8760	29853	NSP4	S76S	SNP_silent	Transmembrane protein
EPI_ISL_424296	17747	C	T	17725	29853	NSP13	P504L	SNP	Helicase
EPI_ISL_424296	17858	A	G	17836	29853	NSP13	Y541C	SNP	Helicase
EPI_ISL_424296	18060	C	T	18038	29853	NSP14	L7L	SNP_silent	3'-to-5' exonuclease
EPI_ISL_424296	21800	G	T	21778	29853	S	D80Y	SNP	Spike
EPI_ISL_424296	25418	C	A	25396	29853	ORF3a	T9K	SNP	ORF3a protein
EPI_ISL_424296	26152	G	A	26130	29853	ORF3a	G254R	SNP	ORF3a protein
EPI_ISL_424296	28144	T	C	28122	29853	ORF8	L84S	SNP	ORF8 protein
EPI_ISL_424296	29838	C	T	29816	29853	3'UTR	29838	extragenic	NA
EPI_ISL_424311	34	AAC	TTT	28	29892	5'UTR	34	extragenic	NA
EPI_ISL_424311	241	C	T	235	29892	5'UTR	241	extragenic	NA
EPI_ISL_424311	1059	C	T	1053	29892	NSP2	T85I	SNP	Non-Structural protein 2
EPI_ISL_424311	3037	C	T	3031	29892	NSP3	F106F	SNP_silent	Predicted phosphoesterase, papain-like proteinase
EPI_ISL_424311	14408	C	T	14402	29892	NSP12b	P314L	SNP	RNA-dependent RNA polymerase, post-ribosomal frameshift
EPI_ISL_424311	19962	G	C	19956	29892	NSP15	T114T	SNP_silent	endoRNAse
EPI_ISL_424311	23403	A	G	23397	29892	S	D614G	SNP	Spike
EPI_ISL_424311	25563	G	T	25557	29892	ORF3a	Q57H	SNP	ORF3a protein
EPI_ISL_424311	28144	T	C	28138	29892	ORF8	L84S	SNP	ORF8 protein
EPI_ISL_424311	29311	C	T	29305	29892	N	F346F	SNP_silent	Nucleocapsid protein
EPI_ISL_424333	34	AACC	TTTA	20	29858	5'UTR	34	extragenic	NA
EPI_ISL_424333	241	C	T	227	29858	5'UTR	241	extragenic	NA
EPI_ISL_424333	1059	C	T	1045	29858	NSP2	T85I	SNP	Non-Structural protein 2
EPI_ISL_424333	3037	C	T	3023	29858	NSP3	F106F	SNP_silent	Predicted phosphoesterase, papain-like proteinase
EPI_ISL_424333	7164	C	T	7150	29858	NSP3	T1482I	SNP	Predicted phosphoesterase, papain-like proteinase
EPI_ISL_424333	14408	C	T	14394	29858	NSP12b	P314L	SNP	RNA-dependent RNA polymerase, post-ribosomal frameshift
EPI_ISL_424333	23403	A	G	23389	29858	S	D614G	SNP	Spike
EPI_ISL_424333	25563	G	T	25549	29858	ORF3a	Q57H	SNP	ORF3a protein
EPI_ISL_424333	29553	G	A	29539	29858	3'UTR	29553	extragenic	NA
EPI_ISL_424337	34	AAC	TTT	28	29863	5'UTR	34	extragenic	NA
EPI_ISL_424337	241	C	T	235	29863	5'UTR	241	extragenic	NA
EPI_ISL_424337	1059	C	T	1053	29863	NSP2	T85I	SNP	Non-Structural protein 2
EPI_ISL_424337	3037	C	T	3031	29863	NSP3	F106F	SNP_silent	Predicted phosphoesterase, papain-like proteinase
EPI_ISL_424337	14408	C	T	14402	29863	NSP12b	P314L	SNP	RNA-dependent RNA polymerase, post-ribosomal frameshift
EPI_ISL_424337	16912	G	T	16906	29863	NSP13	V226L	SNP	Helicase
EPI_ISL_424337	23403	A	G	23397	29863	S	D614G	SNP	Spike
EPI_ISL_424337	25563	G	T	25557	29863	ORF3a	Q57H	SNP	ORF3a protein
EPI_ISL_424337	29553	G	A	29547	29863	3'UTR	29553	extragenic	NA
EPI_ISL_426081	34	AACC	TTTA	27	29884	5'UTR	34	extragenic	NA
EPI_ISL_426081	241	C	T	234	29884	5'UTR	241	extragenic	NA
EPI_ISL_426081	1059	C	T	1052	29884	NSP2	T85I	SNP	Non-Structural protein 2
EPI_ISL_426081	3037	C	T	3030	29884	NSP3	F106F	SNP_silent	Predicted phosphoesterase, papain-like proteinase
EPI_ISL_426081	14408	C	T	14401	29884	NSP12b	P314L	SNP	RNA-dependent RNA polymerase, post-ribosomal frameshift
EPI_ISL_426081	16912	G	T	16905	29884	NSP13	V226L	SNP	Helicase
EPI_ISL_426081	23403	A	G	23396	29884	S	D614G	SNP	Spike
EPI_ISL_426081	25563	G	T	25556	29884	ORF3a	Q57H	SNP	ORF3a protein
EPI_ISL_426081	29553	G	A	29546	29884	3'UTR	29553	extragenic	NA
EPI_ISL_426083	34	AA	TT	20	29898	5'UTR	34	extragenic	NA
EPI_ISL_426083	241	C	T	227	29898	5'UTR	241	extragenic	NA
EPI_ISL_426083	1059	C	T	1045	29898	NSP2	T85I	SNP	Non-Structural protein 2
EPI_ISL_426083	3037	C	T	3023	29898	NSP3	F106F	SNP_silent	Predicted phosphoesterase, papain-like proteinase
EPI_ISL_426083	14408	C	T	14394	29898	NSP12b	P314L	SNP	RNA-dependent RNA polymerase, post-ribosomal frameshift
EPI_ISL_426083	23403	A	G	23389	29898	S	D614G	SNP	Spike
EPI_ISL_426083	25563	G	T	25549	29898	ORF3a	Q57H	SNP	ORF3a protein
EPI_ISL_426083	28826	C	T	28812	29898	N	R185C	SNP	Nucleocapsid protein
EPI_ISL_426101	34	AACC	TTTA	19	29857	5'UTR	34	extragenic	NA
EPI_ISL_426101	241	C	T	226	29857	5'UTR	241	extragenic	NA
EPI_ISL_426101	1059	C	T	1044	29857	NSP2	T85I	SNP	Non-Structural protein 2
EPI_ISL_426101	3037	C	T	3022	29857	NSP3	F106F	SNP_silent	Predicted phosphoesterase, papain-like proteinase
EPI_ISL_426101	9951	C	T	9936	29857	NSP4	A466V	SNP	Transmembrane protein
EPI_ISL_426101	14408	C	T	14393	29857	NSP12b	P314L	SNP	RNA-dependent RNA polymerase, post-ribosomal frameshift
EPI_ISL_426101	23403	A	G	23388	29857	S	D614G	SNP	Spike
EPI_ISL_426101	25563	G	T	25548	29857	ORF3a	Q57H	SNP	ORF3a protein
EPI_ISL_426112	34	AAC	TTT	17	29868	5'UTR	34	extragenic	NA
EPI_ISL_426112	241	C	T	224	29868	5'UTR	241	extragenic	NA
EPI_ISL_426112	1059	C	T	1042	29868	NSP2	T85I	SNP	Non-Structural protein 2
EPI_ISL_426112	3037	C	T	3020	29868	NSP3	F106F	SNP_silent	Predicted phosphoesterase, papain-like proteinase
EPI_ISL_426112	14408	C	T	14391	29868	NSP12b	P314L	SNP	RNA-dependent RNA polymerase, post-ribosomal frameshift
EPI_ISL_426112	23403	A	G	23386	29868	S	D614G	SNP	Spike
EPI_ISL_426112	25563	G	T	25546	29868	ORF3a	Q57H	SNP	ORF3a protein
EPI_ISL_426112	29553	G	A	29536	29868	3'UTR	29553	extragenic	NA
EPI_ISL_426126	34	AAC	TTT	26	29901	5'UTR	34	extragenic	NA
EPI_ISL_426126	241	C	T	233	29901	5'UTR	241	extragenic	NA
EPI_ISL_426126	1059	C	T	1051	29901	NSP2	T85I	SNP	Non-Structural protein 2
EPI_ISL_426126	3037	C	T	3029	29901	NSP3	F106F	SNP_silent	Predicted phosphoesterase, papain-like proteinase
EPI_ISL_426126	14408	C	T	14400	29901	NSP12b	P314L	SNP	RNA-dependent RNA polymerase, post-ribosomal frameshift
EPI_ISL_426126	23403	A	G	23395	29901	S	D614G	SNP	Spike
EPI_ISL_426126	25563	G	T	25555	29901	ORF3a	Q57H	SNP	ORF3a protein
EPI_ISL_427163	34	AAC	TTT	17	29847	5'UTR	34	extragenic	NA
EPI_ISL_427163	241	C	T	224	29847	5'UTR	241	extragenic	NA
EPI_ISL_427163	1059	C	T	1042	29847	NSP2	T85I	SNP	Non-Structural protein 2
EPI_ISL_427163	3037	C	T	3020	29847	NSP3	F106F	SNP_silent	Predicted phosphoesterase, papain-like proteinase
EPI_ISL_427163	14408	C	T	14391	29847	NSP12b	P314L	SNP	RNA-dependent RNA polymerase, post-ribosomal frameshift
EPI_ISL_427163	23403	A	G	23386	29847	S	D614G	SNP	Spike
EPI_ISL_427163	25563	G	T	25546	29847	ORF3a	Q57H	SNP	ORF3a protein
EPI_ISL_427163	28089	G	T	28072	29847	ORF8	G66C	SNP	ORF8 protein
EPI_ISL_427241	34	AAC	TTT	18	29871	5'UTR	34	extragenic	NA
EPI_ISL_427241	241	C	T	225	29871	5'UTR	241	extragenic	NA
EPI_ISL_427241	1059	C	T	1043	29871	NSP2	T85I	SNP	Non-Structural protein 2
EPI_ISL_427241	3037	C	T	3021	29871	NSP3	F106F	SNP_silent	Predicted phosphoesterase, papain-like proteinase
EPI_ISL_427241	4084	C	T	4068	29871	NSP3	D455D	SNP_silent	Predicted phosphoesterase, papain-like proteinase
EPI_ISL_427241	14408	C	T	14392	29871	NSP12b	P314L	SNP	RNA-dependent RNA polymerase, post-ribosomal frameshift
EPI_ISL_427241	23403	A	G	23387	29871	S	D614G	SNP	Spike
EPI_ISL_427241	25563	G	T	25547	29871	ORF3a	Q57H	SNP	ORF3a protein
EPI_ISL_427241	29553	G	A	29537	29871	3'UTR	29553	extragenic	NA
EPI_ISL_427242	34	AAC	TTT	9	29878	5'UTR	34	extragenic	NA
EPI_ISL_427242	241	C	T	216	29878	5'UTR	241	extragenic	NA
EPI_ISL_427242	1059	C	T	1034	29878	NSP2	T85I	SNP	Non-Structural protein 2
EPI_ISL_427242	3037	C	T	3012	29878	NSP3	F106F	SNP_silent	Predicted phosphoesterase, papain-like proteinase
EPI_ISL_427242	14408	C	T	14383	29878	NSP12b	P314L	SNP	RNA-dependent RNA polymerase, post-ribosomal frameshift
EPI_ISL_427242	21146	T	A	21121	29878	NSP16	L163H	SNP	2'-O-ribose methyltransferase
EPI_ISL_427242	23403	A	G	23378	29878	S	D614G	SNP	Spike
EPI_ISL_427242	25563	G	T	25538	29878	ORF3a	Q57H	SNP	ORF3a protein
EPI_ISL_427248	34	AAC	TTT	32	29872	5'UTR	34	extragenic	NA
EPI_ISL_427248	241	C	T	239	29872	5'UTR	241	extragenic	NA
EPI_ISL_427248	1059	C	T	1057	29872	NSP2	T85I	SNP	Non-Structural protein 2
EPI_ISL_427248	3037	C	T	3035	29872	NSP3	F106F	SNP_silent	Predicted phosphoesterase, papain-like proteinase
EPI_ISL_427248	6040	C	T	6038	29872	NSP3	F1107F	SNP_silent	Predicted phosphoesterase, papain-like proteinase
EPI_ISL_427248	14408	C	T	14406	29872	NSP12b	P314L	SNP	RNA-dependent RNA polymerase, post-ribosomal frameshift
EPI_ISL_427248	23403	A	G	23401	29872	S	D614G	SNP	Spike
EPI_ISL_427248	25563	G	T	25561	29872	ORF3a	Q57H	SNP	ORF3a protein
EPI_ISL_427266	34	AAC	TTT	26	29864	5'UTR	34	extragenic	NA
EPI_ISL_427266	2840	G	A	2832	29864	NSP3	A41T	SNP	Predicted phosphoesterase, papain-like proteinase
EPI_ISL_427266	5572	G	T	5564	29864	NSP3	M951I	SNP	Predicted phosphoesterase, papain-like proteinase
EPI_ISL_427266	8782	C	T	8774	29864	NSP4	S76S	SNP_silent	Transmembrane protein
EPI_ISL_427266	17747	C	T	17739	29864	NSP13	P504L	SNP	Helicase
EPI_ISL_427266	17858	A	G	17850	29864	NSP13	Y541C	SNP	Helicase
EPI_ISL_427266	18060	C	T	18052	29864	NSP14	L7L	SNP_silent	3'-to-5' exonuclease
EPI_ISL_427266	26045	A	G	26037	29864	ORF3a	Q218R	SNP	ORF3a protein
EPI_ISL_427266	27838	T	A	27830	29864	ORF7b	F28Y	SNP	ORF7b protein
EPI_ISL_427266	28144	T	C	28136	29864	ORF8	L84S	SNP	ORF8 protein
EPI_ISL_413025	35	AC	TT	35	29903	5'UTR	35	extragenic	NA
EPI_ISL_413025	2446	T	C	2446	29903	NSP2	T547T	SNP_silent	Non-Structural protein 2
EPI_ISL_413025	3411	C	T	3411	29903	NSP3	A231V	SNP	Predicted phosphoesterase, papain-like proteinase
EPI_ISL_413025	5572	G	T	5572	29903	NSP3	M951I	SNP	Predicted phosphoesterase, papain-like proteinase
EPI_ISL_413025	11083	G	T	11083	29903	NSP6	L37F	SNP	Transmembrane protein
EPI_ISL_413025	14805	C	T	14805	29903	NSP12b	Y446Y	SNP_silent	RNA-dependent RNA polymerase, post-ribosomal frameshift
EPI_ISL_413025	26144	G	T	26144	29903	ORF3a	G251V	SNP	ORF3a protein
EPI_ISL_413025	29864	G	A	29864	29903	3'UTR	29864	extragenic	NA
EPI_ISL_413025	29867	TG	AA	29867	29903	3'UTR	29867	extragenic	NA
EPI_ISL_413025	29870	C	A	29870	29903	3'UTR	29870	extragenic	NA
EPI_ISL_414368	35	A	T	22	29890	5'UTR	35	extragenic	NA
EPI_ISL_414368	8782	C	T	8769	29890	NSP4	S76S	SNP_silent	Transmembrane protein
EPI_ISL_414368	17747	C	T	17734	29890	NSP13	P504L	SNP	Helicase
EPI_ISL_414368	17858	A	G	17845	29890	NSP13	Y541C	SNP	Helicase
EPI_ISL_414368	18060	C	T	18047	29890	NSP14	L7L	SNP_silent	3'-to-5' exonuclease
EPI_ISL_414368	28144	T	C	28131	29890	ORF8	L84S	SNP	ORF8 protein
EPI_ISL_416433	35	AC	TT	17	29895	5'UTR	35	extragenic	NA
EPI_ISL_416433	8782	C	T	8764	29895	NSP4	S76S	SNP_silent	Transmembrane protein
EPI_ISL_416433	17747	C	T	17729	29895	NSP13	P504L	SNP	Helicase
EPI_ISL_416433	17858	A	G	17840	29895	NSP13	Y541C	SNP	Helicase
EPI_ISL_416433	18060	C	T	18042	29895	NSP14	L7L	SNP_silent	3'-to-5' exonuclease
EPI_ISL_416433	28144	T	C	28126	29895	ORF8	L84S	SNP	ORF8 protein
EPI_ISL_416657	35	AC	TT	35	29903	5'UTR	35	extragenic	NA
EPI_ISL_416657	8782	C	T	8782	29903	NSP4	S76S	SNP_silent	Transmembrane protein
EPI_ISL_416657	17747	C	T	17747	29903	NSP13	P504L	SNP	Helicase
EPI_ISL_416657	17858	A	G	17858	29903	NSP13	Y541C	SNP	Helicase
EPI_ISL_416657	18060	C	T	18060	29903	NSP14	L7L	SNP_silent	3'-to-5' exonuclease
EPI_ISL_416657	28144	T	C	28144	29903	ORF8	L84S	SNP	ORF8 protein
EPI_ISL_416657	29728	TTC	GGG	29728	29903	3'UTR	29728	extragenic	NA
EPI_ISL_416657	29732	CC	GA	29732	29903	3'UTR	29732	extragenic	NA
EPI_ISL_416657	29735	AG	CT	29735	29903	3'UTR	29735	extragenic	NA
EPI_ISL_416657	29740	A	T	29740	29903	3'UTR	29740	extragenic	NA
EPI_ISL_416657	29764	G	T	29764	29903	3'UTR	29764	extragenic	NA
EPI_ISL_416657	29768	A	C	29768	29903	3'UTR	29768	extragenic	NA
EPI_ISL_416657	29771	A	C	29771	29903	3'UTR	29771	extragenic	NA
EPI_ISL_416657	29776	A	T	29776	29903	3'UTR	29776	extragenic	NA
EPI_ISL_416668	35	AC	TT	28	29907	5'UTR	35	extragenic	NA
EPI_ISL_416668	8782	C	T	8775	29907	NSP4	S76S	SNP_silent	Transmembrane protein
EPI_ISL_416668	17747	C	T	17740	29907	NSP13	P504L	SNP	Helicase
EPI_ISL_416668	17858	A	G	17851	29907	NSP13	Y541C	SNP	Helicase
EPI_ISL_416668	18060	C	T	18053	29907	NSP14	L7L	SNP_silent	3'-to-5' exonuclease
EPI_ISL_416668	27384	T	C	27377	29907	ORF6	D61D	SNP_silent	ORF6 protein
EPI_ISL_416668	28144	T	C	28137	29907	ORF8	L84S	SNP	ORF8 protein
EPI_ISL_417358	35	AC	TT	29	29897	5'UTR	35	extragenic	NA
EPI_ISL_417358	8782	C	T	8776	29897	NSP4	S76S	SNP_silent	Transmembrane protein
EPI_ISL_417358	17747	C	T	17741	29897	NSP13	P504L	SNP	Helicase
EPI_ISL_417358	17858	A	G	17852	29897	NSP13	Y541C	SNP	Helicase
EPI_ISL_417358	18060	C	T	18054	29897	NSP14	L7L	SNP_silent	3'-to-5' exonuclease
EPI_ISL_417358	28144	T	C	28138	29897	ORF8	L84S	SNP	ORF8 protein
EPI_ISL_417362	35	AC	TT	17	29860	5'UTR	35	extragenic	NA
EPI_ISL_417362	241	C	T	223	29860	5'UTR	241	extragenic	NA
EPI_ISL_417362	3037	C	T	3019	29860	NSP3	F106F	SNP_silent	Predicted phosphoesterase, papain-like proteinase
EPI_ISL_417362	14408	C	T	14390	29860	NSP12b	P314L	SNP	RNA-dependent RNA polymerase, post-ribosomal frameshift
EPI_ISL_417362	23403	A	G	23385	29860	S	D614G	SNP	Spike
EPI_ISL_417362	28881	GGG	AAC	28863	29860	N	RG203KR	SNP	Nucleocapsid protein
EPI_ISL_417366	35	AC	TT	25	29884	5'UTR	35	extragenic	NA
EPI_ISL_417366	354	G	A	344	29884	NSP1	G30D	SNP	Leader protein
EPI_ISL_417366	5716	G	T	5706	29884	NSP3	K999N	SNP	Predicted phosphoesterase, papain-like proteinase
EPI_ISL_417366	8782	C	T	8772	29884	NSP4	S76S	SNP_silent	Transmembrane protein
EPI_ISL_417366	17747	C	T	17737	29884	NSP13	P504L	SNP	Helicase
EPI_ISL_417366	17858	A	G	17848	29884	NSP13	Y541C	SNP	Helicase
EPI_ISL_417366	18060	C	T	18050	29884	NSP14	L7L	SNP_silent	3'-to-5' exonuclease
EPI_ISL_417366	28144	T	C	28134	29884	ORF8	L84S	SNP	ORF8 protein
EPI_ISL_417379	35	AC	TT	19	29883	5'UTR	35	extragenic	NA
EPI_ISL_417379	197	CGG	.	180	29883	5'UTR	197	extragenic	NA
EPI_ISL_417379	202	T	G	183	29883	5'UTR	202	extragenic	NA
EPI_ISL_417379	204	GT	AG	185	29883	5'UTR	204	extragenic	NA
EPI_ISL_417379	208	.	GCT	190	29883	5'UTR	208	extragenic	NA
EPI_ISL_417379	210	G	A	194	29883	5'UTR	210	extragenic	NA
EPI_ISL_417379	241	C	T	225	29883	5'UTR	241	extragenic	NA
EPI_ISL_417379	1059	C	T	1043	29883	NSP2	T85I	SNP	Non-Structural protein 2
EPI_ISL_417379	3037	C	T	3021	29883	NSP3	F106F	SNP_silent	Predicted phosphoesterase, papain-like proteinase
EPI_ISL_417379	14408	C	T	14392	29883	NSP12b	P314L	SNP	RNA-dependent RNA polymerase, post-ribosomal frameshift
EPI_ISL_417379	23403	A	G	23387	29883	S	D614G	SNP	Spike
EPI_ISL_417379	25563	G	T	25547	29883	ORF3a	Q57H	SNP	ORF3a protein
EPI_ISL_417379	29553	G	A	29537	29883	3'UTR	29553	extragenic	NA
EPI_ISL_418041	35	ACC	TTT	20	29879	5'UTR	35	extragenic	NA
EPI_ISL_418041	241	C	T	226	29879	5'UTR	241	extragenic	NA
EPI_ISL_418041	686	AAGTCATTT	.	670	29879	NSP1	K141	deletion	Leader protein
EPI_ISL_418041	1059	C	T	1035	29879	NSP2	T85I	SNP	Non-Structural protein 2
EPI_ISL_418041	3037	C	T	3013	29879	NSP3	F106F	SNP_silent	Predicted phosphoesterase, papain-like proteinase
EPI_ISL_418041	14408	C	T	14384	29879	NSP12b	P314L	SNP	RNA-dependent RNA polymerase, post-ribosomal frameshift
EPI_ISL_418041	23403	A	G	23379	29879	S	D614G	SNP	Spike
EPI_ISL_418041	25563	G	T	25539	29879	ORF3a	Q57H	SNP	ORF3a protein
EPI_ISL_418041	26433	A	G	26409	29879	E	K63K	SNP_silent	Envelope
EPI_ISL_418072	35	AC	TT	16	29881	5'UTR	35	extragenic	NA
EPI_ISL_418072	241	C	T	222	29881	5'UTR	241	extragenic	NA
EPI_ISL_418072	833	T	C	814	29881	NSP2	F10L	SNP	Non-Structural protein 2
EPI_ISL_418072	1059	C	T	1040	29881	NSP2	T85I	SNP	Non-Structural protein 2
EPI_ISL_418072	3037	C	T	3018	29881	NSP3	F106F	SNP_silent	Predicted phosphoesterase, papain-like proteinase
EPI_ISL_418072	14408	C	T	14389	29881	NSP12b	P314L	SNP	RNA-dependent RNA polymerase, post-ribosomal frameshift
EPI_ISL_418072	23403	A	G	23384	29881	S	D614G	SNP	Spike
EPI_ISL_418072	25563	G	T	25544	29881	ORF3a	Q57H	SNP	ORF3a protein
EPI_ISL_418072	27964	C	T	27945	29881	ORF8	S24L	SNP	ORF8 protein
EPI_ISL_418866	35	AC	TT	28	29910	5'UTR	35	extragenic	NA
EPI_ISL_418866	8782	C	T	8775	29910	NSP4	S76S	SNP_silent	Transmembrane protein
EPI_ISL_418866	17747	C	T	17740	29910	NSP13	P504L	SNP	Helicase
EPI_ISL_418866	17858	A	G	17851	29910	NSP13	Y541C	SNP	Helicase
EPI_ISL_418866	18060	C	T	18053	29910	NSP14	L7L	SNP_silent	3'-to-5' exonuclease
EPI_ISL_418866	28144	T	C	28137	29910	ORF8	L84S	SNP	ORF8 protein
EPI_ISL_418905	35	AC	TT	12	29876	5'UTR	35	extragenic	NA
EPI_ISL_418905	8782	C	T	8759	29876	NSP4	S76S	SNP_silent	Transmembrane protein
EPI_ISL_418905	17747	C	T	17724	29876	NSP13	P504L	SNP	Helicase
EPI_ISL_418905	17858	A	G	17835	29876	NSP13	Y541C	SNP	Helicase
EPI_ISL_418905	18060	C	T	18037	29876	NSP14	L7L	SNP_silent	3'-to-5' exonuclease
EPI_ISL_418905	23010	T	C	22987	29876	S	V483A	SNP	Spike
EPI_ISL_418905	28144	T	C	28121	29876	ORF8	L84S	SNP	ORF8 protein
EPI_ISL_418908	35	AC	TT	34	29902	5'UTR	35	extragenic	NA
EPI_ISL_418908	1238	C	T	1237	29902	NSP2	H145Y	SNP	Non-Structural protein 2
EPI_ISL_418908	3593	C	T	3592	29902	NSP3	L292F	SNP	Predicted phosphoesterase, papain-like proteinase
EPI_ISL_418908	4683	C	T	4682	29902	NSP3	A655V	SNP	Predicted phosphoesterase, papain-like proteinase
EPI_ISL_418908	8782	C	T	8781	29902	NSP4	S76S	SNP_silent	Transmembrane protein
EPI_ISL_418908	17747	C	T	17746	29902	NSP13	P504L	SNP	Helicase
EPI_ISL_418908	17858	A	G	17857	29902	NSP13	Y541C	SNP	Helicase
EPI_ISL_418908	18060	C	T	18059	29902	NSP14	L7L	SNP_silent	3'-to-5' exonuclease
EPI_ISL_418908	27200	A	G	27199	29902	3'UTR	27200	extragenic	NA
EPI_ISL_418908	28144	T	C	28143	29902	ORF8	L84S	SNP	ORF8 protein
EPI_ISL_418908	28924	T	C	28923	29902	N	A217A	SNP_silent	Nucleocapsid protein
EPI_ISL_418916	35	ACC	TTA	22	29889	5'UTR	35	extragenic	NA
EPI_ISL_418916	1440	G	A	1427	29889	NSP2	G212D	SNP	Non-Structural protein 2
EPI_ISL_418916	2891	G	A	2878	29889	NSP3	A58T	SNP	Predicted phosphoesterase, papain-like proteinase
EPI_ISL_418916	28854	C	T	28841	29889	N	S194L	SNP	Nucleocapsid protein
EPI_ISL_418933	35	A	T	29	29872	5'UTR	35	extragenic	NA
EPI_ISL_418933	241	C	T	235	29872	5'UTR	241	extragenic	NA
EPI_ISL_418933	1059	C	T	1053	29872	NSP2	T85I	SNP	Non-Structural protein 2
EPI_ISL_418933	3037	C	T	3031	29872	NSP3	F106F	SNP_silent	Predicted phosphoesterase, papain-like proteinase
EPI_ISL_418933	14408	C	T	14402	29872	NSP12b	P314L	SNP	RNA-dependent RNA polymerase, post-ribosomal frameshift
EPI_ISL_418933	23403	A	G	23397	29872	S	D614G	SNP	Spike
EPI_ISL_418933	25563	G	T	25557	29872	ORF3a	Q57H	SNP	ORF3a protein
EPI_ISL_418933	29553	G	A	29547	29872	3'UTR	29553	extragenic	NA
EPI_ISL_418954	35	A	T	28	29892	5'UTR	35	extragenic	NA
EPI_ISL_418954	241	C	T	234	29892	5'UTR	241	extragenic	NA
EPI_ISL_418954	1059	C	T	1052	29892	NSP2	T85I	SNP	Non-Structural protein 2
EPI_ISL_418954	3037	C	T	3030	29892	NSP3	F106F	SNP_silent	Predicted phosphoesterase, papain-like proteinase
EPI_ISL_418954	14408	C	T	14401	29892	NSP12b	P314L	SNP	RNA-dependent RNA polymerase, post-ribosomal frameshift
EPI_ISL_418954	23403	A	G	23396	29892	S	D614G	SNP	Spike
EPI_ISL_418954	25523	G	T	25516	29892	ORF3a	G44V	SNP	ORF3a protein
EPI_ISL_418954	25563	G	T	25556	29892	ORF3a	Q57H	SNP	ORF3a protein
EPI_ISL_418954	27869	T	C	27862	29892	ORF7b	N38N	SNP_silent	ORF7b protein
EPI_ISL_423001	35	A	T	25	29888	5'UTR	35	extragenic	NA
EPI_ISL_423001	241	C	T	231	29888	5'UTR	241	extragenic	NA
EPI_ISL_423001	1059	C	T	1049	29888	NSP2	T85I	SNP	Non-Structural protein 2
EPI_ISL_423001	3037	C	T	3027	29888	NSP3	F106F	SNP_silent	Predicted phosphoesterase, papain-like proteinase
EPI_ISL_423001	14408	C	T	14398	29888	NSP12b	P314L	SNP	RNA-dependent RNA polymerase, post-ribosomal frameshift
EPI_ISL_423001	16912	G	T	16902	29888	NSP13	V226L	SNP	Helicase
EPI_ISL_423001	23403	A	G	23393	29888	S	D614G	SNP	Spike
EPI_ISL_423001	25563	G	T	25553	29888	ORF3a	Q57H	SNP	ORF3a protein
EPI_ISL_423001	29553	G	A	29543	29888	3'UTR	29553	extragenic	NA
EPI_ISL_423021	35	A	T	11	29855	5'UTR	35	extragenic	NA
EPI_ISL_423021	241	C	T	217	29855	5'UTR	241	extragenic	NA
EPI_ISL_423021	1059	C	T	1035	29855	NSP2	T85I	SNP	Non-Structural protein 2
EPI_ISL_423021	3037	C	T	3013	29855	NSP3	F106F	SNP_silent	Predicted phosphoesterase, papain-like proteinase
EPI_ISL_423021	7560	G	A	7536	29855	NSP3	R1614K	SNP	Predicted phosphoesterase, papain-like proteinase
EPI_ISL_423021	14408	C	T	14384	29855	NSP12b	P314L	SNP	RNA-dependent RNA polymerase, post-ribosomal frameshift
EPI_ISL_423021	19999	G	T	19975	29855	NSP15	V127F	SNP	endoRNAse
EPI_ISL_423021	21452	G	T	21428	29855	NSP16	G265V	SNP	2'-O-ribose methyltransferase
EPI_ISL_423021	23403	A	G	23379	29855	S	D614G	SNP	Spike
EPI_ISL_423021	25563	G	T	25539	29855	ORF3a	Q57H	SNP	ORF3a protein
EPI_ISL_423032	35	A	T	10	29847	5'UTR	35	extragenic	NA
EPI_ISL_423032	241	C	T	216	29847	5'UTR	241	extragenic	NA
EPI_ISL_423032	1059	C	T	1034	29847	NSP2	T85I	SNP	Non-Structural protein 2
EPI_ISL_423032	2551	T	C	2526	29847	NSP2	D582D	SNP_silent	Non-Structural protein 2
EPI_ISL_423032	3037	C	T	3012	29847	NSP3	F106F	SNP_silent	Predicted phosphoesterase, papain-like proteinase
EPI_ISL_423032	14408	C	T	14383	29847	NSP12b	P314L	SNP	RNA-dependent RNA polymerase, post-ribosomal frameshift
EPI_ISL_423032	16912	G	T	16887	29847	NSP13	V226L	SNP	Helicase
EPI_ISL_423032	23403	A	G	23378	29847	S	D614G	SNP	Spike
EPI_ISL_423032	25563	G	T	25538	29847	ORF3a	Q57H	SNP	ORF3a protein
EPI_ISL_423032	29553	G	A	29528	29847	3'UTR	29553	extragenic	NA
EPI_ISL_424183	35	A	T	35	29913	5'UTR	35	extragenic	NA
EPI_ISL_424183	241	C	T	241	29913	5'UTR	241	extragenic	NA
EPI_ISL_424183	1059	C	T	1059	29913	NSP2	T85I	SNP	Non-Structural protein 2
EPI_ISL_424183	3037	C	T	3037	29913	NSP3	F106F	SNP_silent	Predicted phosphoesterase, papain-like proteinase
EPI_ISL_424183	14408	C	T	14408	29913	NSP12b	P314L	SNP	RNA-dependent RNA polymerase, post-ribosomal frameshift
EPI_ISL_424183	23403	A	G	23403	29913	S	D614G	SNP	Spike
EPI_ISL_424183	25563	G	T	25563	29913	ORF3a	Q57H	SNP	ORF3a protein
EPI_ISL_424183	29553	G	A	29553	29913	3'UTR	29553	extragenic	NA
EPI_ISL_424204	35	A	T	28	29895	5'UTR	35	extragenic	NA
EPI_ISL_424204	241	C	T	234	29895	5'UTR	241	extragenic	NA
EPI_ISL_424204	1059	C	T	1052	29895	NSP2	T85I	SNP	Non-Structural protein 2
EPI_ISL_424204	3037	C	T	3030	29895	NSP3	F106F	SNP_silent	Predicted phosphoesterase, papain-like proteinase
EPI_ISL_424204	11083	G	T	11076	29895	NSP6	L37F	SNP	Transmembrane protein
EPI_ISL_424204	14408	C	T	14401	29895	NSP12b	P314L	SNP	RNA-dependent RNA polymerase, post-ribosomal frameshift
EPI_ISL_424204	23403	A	G	23396	29895	S	D614G	SNP	Spike
EPI_ISL_424204	25563	G	T	25556	29895	ORF3a	Q57H	SNP	ORF3a protein
EPI_ISL_424204	29553	G	A	29546	29895	3'UTR	29553	extragenic	NA
EPI_ISL_424225	35	A	T	9	29876	5'UTR	35	extragenic	NA
EPI_ISL_424225	241	C	T	215	29876	5'UTR	241	extragenic	NA
EPI_ISL_424225	833	T	C	807	29876	NSP2	F10L	SNP	Non-Structural protein 2
EPI_ISL_424225	1059	C	T	1033	29876	NSP2	T85I	SNP	Non-Structural protein 2
EPI_ISL_424225	3037	C	T	3011	29876	NSP3	F106F	SNP_silent	Predicted phosphoesterase, papain-like proteinase
EPI_ISL_424225	11455	C	T	11429	29876	NSP6	A161A	SNP_silent	Transmembrane protein
EPI_ISL_424225	14408	C	T	14382	29876	NSP12b	P314L	SNP	RNA-dependent RNA polymerase, post-ribosomal frameshift
EPI_ISL_424225	23403	A	G	23377	29876	S	D614G	SNP	Spike
EPI_ISL_424225	25563	G	T	25537	29876	ORF3a	Q57H	SNP	ORF3a protein
EPI_ISL_424225	27964	C	T	27938	29876	ORF8	S24L	SNP	ORF8 protein
EPI_ISL_424242	35	A	T	31	29899	5'UTR	35	extragenic	NA
EPI_ISL_424242	241	C	T	237	29899	5'UTR	241	extragenic	NA
EPI_ISL_424242	1059	C	T	1055	29899	NSP2	T85I	SNP	Non-Structural protein 2
EPI_ISL_424242	2716	C	T	2712	29899	NSP2	G637G	SNP_silent	Non-Structural protein 2
EPI_ISL_424242	3037	C	T	3033	29899	NSP3	F106F	SNP_silent	Predicted phosphoesterase, papain-like proteinase
EPI_ISL_424242	14408	C	T	14404	29899	NSP12b	P314L	SNP	RNA-dependent RNA polymerase, post-ribosomal frameshift
EPI_ISL_424242	16912	G	T	16908	29899	NSP13	V226L	SNP	Helicase
EPI_ISL_424242	23403	A	G	23399	29899	S	D614G	SNP	Spike
EPI_ISL_424242	25563	G	T	25559	29899	ORF3a	Q57H	SNP	ORF3a protein
EPI_ISL_424242	26775	G	T	26771	29899	M	A85S	SNP	Membrane
EPI_ISL_424242	29553	G	A	29549	29899	3'UTR	29553	extragenic	NA
EPI_ISL_424250	35	AC	TT	21	29856	5'UTR	35	extragenic	NA
EPI_ISL_424250	6821	A	G	6807	29856	NSP3	T1368A	SNP	Predicted phosphoesterase, papain-like proteinase
EPI_ISL_424250	8092	C	T	8078	29856	NSP3	L1791L	SNP_silent	Predicted phosphoesterase, papain-like proteinase
EPI_ISL_424250	8782	C	T	8768	29856	NSP4	S76S	SNP_silent	Transmembrane protein
EPI_ISL_424250	17747	C	T	17733	29856	NSP13	P504L	SNP	Helicase
EPI_ISL_424250	17858	A	G	17844	29856	NSP13	Y541C	SNP	Helicase
EPI_ISL_424250	18060	C	T	18046	29856	NSP14	L7L	SNP_silent	3'-to-5' exonuclease
EPI_ISL_424250	26037	C	T	26023	29856	ORF3a	Y215Y	SNP_silent	ORF3a protein
EPI_ISL_424250	28144	T	C	28130	29856	ORF8	L84S	SNP	ORF8 protein
EPI_ISL_424297	35	AC	TT	25	29892	5'UTR	35	extragenic	NA
EPI_ISL_424297	8782	C	T	8772	29892	NSP4	S76S	SNP_silent	Transmembrane protein
EPI_ISL_424297	10002	C	T	9992	29892	NSP4	S483F	SNP	Transmembrane protein
EPI_ISL_424297	10844	A	G	10834	29892	NSP5	M264V	SNP	3C-like proteinase
EPI_ISL_424297	17747	C	T	17737	29892	NSP13	P504L	SNP	Helicase
EPI_ISL_424297	17858	A	G	17848	29892	NSP13	Y541C	SNP	Helicase
EPI_ISL_424297	18060	C	T	18050	29892	NSP14	L7L	SNP_silent	3'-to-5' exonuclease
EPI_ISL_424297	28144	T	C	28134	29892	ORF8	L84S	SNP	ORF8 protein
EPI_ISL_424318	35	AC	TT	20	29846	5'UTR	35	extragenic	NA
EPI_ISL_424318	241	C	T	226	29846	5'UTR	241	extragenic	NA
EPI_ISL_424318	833	T	C	818	29846	NSP2	F10L	SNP	Non-Structural protein 2
EPI_ISL_424318	1059	C	T	1044	29846	NSP2	T85I	SNP	Non-Structural protein 2
EPI_ISL_424318	3037	C	T	3022	29846	NSP3	F106F	SNP_silent	Predicted phosphoesterase, papain-like proteinase
EPI_ISL_424318	11270	ATGGTTGAT	.	11254	29846	NSP6	M100	deletion	Transmembrane protein
EPI_ISL_424318	14408	C	T	14384	29846	NSP12b	P314L	SNP	RNA-dependent RNA polymerase, post-ribosomal frameshift
EPI_ISL_424318	23403	A	G	23379	29846	S	D614G	SNP	Spike
EPI_ISL_424318	25563	G	T	25539	29846	ORF3a	Q57H	SNP	ORF3a protein
EPI_ISL_424318	27964	C	T	27940	29846	ORF8	S24L	SNP	ORF8 protein
EPI_ISL_426094	35	AC	TT	18	29862	5'UTR	35	extragenic	NA
EPI_ISL_426094	187	A	G	170	29862	5'UTR	187	extragenic	NA
EPI_ISL_426094	241	C	T	224	29862	5'UTR	241	extragenic	NA
EPI_ISL_426094	1616	C	T	1599	29862	NSP2	L271F	SNP	Non-Structural protein 2
EPI_ISL_426094	3037	C	T	3020	29862	NSP3	F106F	SNP_silent	Predicted phosphoesterase, papain-like proteinase
EPI_ISL_426094	14408	C	T	14391	29862	NSP12b	P314L	SNP	RNA-dependent RNA polymerase, post-ribosomal frameshift
EPI_ISL_426094	23403	A	G	23386	29862	S	D614G	SNP	Spike
EPI_ISL_426130	35	AC	TT	29	29893	5'UTR	35	extragenic	NA
EPI_ISL_426130	8782	C	T	8776	29893	NSP4	S76S	SNP_silent	Transmembrane protein
EPI_ISL_426130	17747	C	T	17741	29893	NSP13	P504L	SNP	Helicase
EPI_ISL_426130	17858	A	G	17852	29893	NSP13	Y541C	SNP	Helicase
EPI_ISL_426130	18060	C	T	18054	29893	NSP14	L7L	SNP_silent	3'-to-5' exonuclease
EPI_ISL_426130	22516	T	C	22510	29893	S	F318F	SNP_silent	Spike
EPI_ISL_426130	27924	A	G	27918	29893	ORF8	T11A	SNP	ORF8 protein
EPI_ISL_426130	28144	T	C	28138	29893	ORF8	L84S	SNP	ORF8 protein
EPI_ISL_421507	36	C	T	29	29858	5'UTR	36	extragenic	NA
EPI_ISL_421507	241	C	T	234	29858	5'UTR	241	extragenic	NA
EPI_ISL_421507	1059	C	T	1052	29858	NSP2	T85I	SNP	Non-Structural protein 2
EPI_ISL_421507	3037	C	T	3030	29858	NSP3	F106F	SNP_silent	Predicted phosphoesterase, papain-like proteinase
EPI_ISL_421507	3177	C	T	3170	29858	NSP3	P153L	SNP	Predicted phosphoesterase, papain-like proteinase
EPI_ISL_421507	11471	C	T	11464	29858	NSP6	L167F	SNP	Transmembrane protein
EPI_ISL_421507	14408	C	T	14401	29858	NSP12b	P314L	SNP	RNA-dependent RNA polymerase, post-ribosomal frameshift
EPI_ISL_421507	23403	A	G	23396	29858	S	D614G	SNP	Spike
EPI_ISL_421507	23856	G	T	23849	29858	S	R765L	SNP	Spike
EPI_ISL_421507	25563	G	T	25556	29858	ORF3a	Q57H	SNP	ORF3a protein
EPI_ISL_421508	36	C	T	36	29871	5'UTR	36	extragenic	NA
EPI_ISL_421508	241	C	T	241	29871	5'UTR	241	extragenic	NA
EPI_ISL_421508	3037	C	T	3037	29871	NSP3	F106F	SNP_silent	Predicted phosphoesterase, papain-like proteinase
EPI_ISL_421508	14408	C	T	14408	29871	NSP12b	P314L	SNP	RNA-dependent RNA polymerase, post-ribosomal frameshift
EPI_ISL_421508	15324	C	T	15324	29871	NSP12b	N619N	SNP_silent	RNA-dependent RNA polymerase, post-ribosomal frameshift
EPI_ISL_421508	23403	A	G	23403	29871	S	D614G	SNP	Spike
EPI_ISL_426056	36	C	T	5	29831	5'UTR	36	extragenic	NA
EPI_ISL_426056	241	C	T	210	29831	5'UTR	241	extragenic	NA
EPI_ISL_426056	1059	C	T	1028	29831	NSP2	T85I	SNP	Non-Structural protein 2
EPI_ISL_426056	3037	C	T	3006	29831	NSP3	F106F	SNP_silent	Predicted phosphoesterase, papain-like proteinase
EPI_ISL_426056	3768	C	T	3737	29831	NSP3	T350I	SNP	Predicted phosphoesterase, papain-like proteinase
EPI_ISL_426056	10851	C	T	10820	29831	NSP5	A266V	SNP	3C-like proteinase
EPI_ISL_426056	14408	C	T	14377	29831	NSP12b	P314L	SNP	RNA-dependent RNA polymerase, post-ribosomal frameshift
EPI_ISL_426056	23403	A	G	23372	29831	S	D614G	SNP	Spike
EPI_ISL_426056	25563	G	T	25532	29831	ORF3a	Q57H	SNP	ORF3a protein
EPI_ISL_426056	25584	C	T	25553	29831	ORF3a	T64T	SNP_silent	ORF3a protein
EPI_ISL_426064	36	C	T	36	29903	5'UTR	36	extragenic	NA
EPI_ISL_426064	241	C	T	241	29903	5'UTR	241	extragenic	NA
EPI_ISL_426064	833	T	C	833	29903	NSP2	F10L	SNP	Non-Structural protein 2
EPI_ISL_426064	1059	C	T	1059	29903	NSP2	T85I	SNP	Non-Structural protein 2
EPI_ISL_426064	3037	C	T	3037	29903	NSP3	F106F	SNP_silent	Predicted phosphoesterase, papain-like proteinase
EPI_ISL_426064	6354	C	T	6354	29903	NSP3	S1212L	SNP	Predicted phosphoesterase, papain-like proteinase
EPI_ISL_426064	14408	C	T	14408	29903	NSP12b	P314L	SNP	RNA-dependent RNA polymerase, post-ribosomal frameshift
EPI_ISL_426064	23403	A	G	23403	29903	S	D614G	SNP	Spike
EPI_ISL_426064	24014	A	G	24014	29903	S	I818V	SNP	Spike
EPI_ISL_426064	25563	G	T	25563	29903	ORF3a	Q57H	SNP	ORF3a protein
EPI_ISL_426064	27964	C	T	27964	29903	ORF8	S24L	SNP	ORF8 protein
EPI_ISL_426066	36	C	T	24	29898	5'UTR	36	extragenic	NA
EPI_ISL_426066	241	C	T	229	29898	5'UTR	241	extragenic	NA
EPI_ISL_426066	833	T	C	821	29898	NSP2	F10L	SNP	Non-Structural protein 2
EPI_ISL_426066	1059	C	T	1047	29898	NSP2	T85I	SNP	Non-Structural protein 2
EPI_ISL_426066	3037	C	T	3025	29898	NSP3	F106F	SNP_silent	Predicted phosphoesterase, papain-like proteinase
EPI_ISL_426066	14408	C	T	14396	29898	NSP12b	P314L	SNP	RNA-dependent RNA polymerase, post-ribosomal frameshift
EPI_ISL_426066	23403	A	G	23391	29898	S	D614G	SNP	Spike
EPI_ISL_426066	25563	G	T	25551	29898	ORF3a	Q57H	SNP	ORF3a protein
EPI_ISL_426066	27964	C	T	27952	29898	ORF8	S24L	SNP	ORF8 protein
EPI_ISL_426067	36	C	T	6	29825	5'UTR	36	extragenic	NA
EPI_ISL_426067	241	C	T	211	29825	5'UTR	241	extragenic	NA
EPI_ISL_426067	833	T	C	803	29825	NSP2	F10L	SNP	Non-Structural protein 2
EPI_ISL_426067	1059	C	T	1029	29825	NSP2	T85I	SNP	Non-Structural protein 2
EPI_ISL_426067	3037	C	T	3007	29825	NSP3	F106F	SNP_silent	Predicted phosphoesterase, papain-like proteinase
EPI_ISL_426067	14408	C	T	14378	29825	NSP12b	P314L	SNP	RNA-dependent RNA polymerase, post-ribosomal frameshift
EPI_ISL_426067	23403	A	G	23373	29825	S	D614G	SNP	Spike
EPI_ISL_426067	25563	G	T	25533	29825	ORF3a	Q57H	SNP	ORF3a protein
EPI_ISL_426067	27964	C	T	27934	29825	ORF8	S24L	SNP	ORF8 protein
EPI_ISL_426067	29759	GTACAGT	.	29728	29825	3'UTR	29759	extragenic	NA
EPI_ISL_426072	36	C	T	6	29891	5'UTR	36	extragenic	NA
EPI_ISL_426072	241	C	T	211	29891	5'UTR	241	extragenic	NA
EPI_ISL_426072	833	T	C	803	29891	NSP2	F10L	SNP	Non-Structural protein 2
EPI_ISL_426072	1059	C	T	1029	29891	NSP2	T85I	SNP	Non-Structural protein 2
EPI_ISL_426072	3037	C	T	3007	29891	NSP3	F106F	SNP_silent	Predicted phosphoesterase, papain-like proteinase
EPI_ISL_426072	14408	C	T	14378	29891	NSP12b	P314L	SNP	RNA-dependent RNA polymerase, post-ribosomal frameshift
EPI_ISL_426072	18762	G	T	18732	29891	NSP14	M241I	SNP	3'-to-5' exonuclease
EPI_ISL_426072	23403	A	G	23373	29891	S	D614G	SNP	Spike
EPI_ISL_426072	25563	G	T	25533	29891	ORF3a	Q57H	SNP	ORF3a protein
EPI_ISL_426072	27964	C	T	27934	29891	ORF8	S24L	SNP	ORF8 protein
EPI_ISL_426072	29862	G	A	29832	29891	3'UTR	29862	extragenic	NA
EPI_ISL_426072	29864	G	A	29834	29891	3'UTR	29864	extragenic	NA
EPI_ISL_426072	29867	TG	AA	29837	29891	3'UTR	29867	extragenic	NA
EPI_ISL_426072	29870	C	A	29840	29891	3'UTR	29870	extragenic	NA
EPI_ISL_426074	36	C	T	14	29876	5'UTR	36	extragenic	NA
EPI_ISL_426074	241	C	T	219	29876	5'UTR	241	extragenic	NA
EPI_ISL_426074	400	T	C	378	29876	NSP1	H45H	SNP_silent	Leader protein
EPI_ISL_426074	833	T	C	811	29876	NSP2	F10L	SNP	Non-Structural protein 2
EPI_ISL_426074	1059	C	T	1037	29876	NSP2	T85I	SNP	Non-Structural protein 2
EPI_ISL_426074	3037	C	T	3015	29876	NSP3	F106F	SNP_silent	Predicted phosphoesterase, papain-like proteinase
EPI_ISL_426074	5934	C	T	5912	29876	NSP3	T1072I	SNP	Predicted phosphoesterase, papain-like proteinase
EPI_ISL_426074	14408	C	T	14386	29876	NSP12b	P314L	SNP	RNA-dependent RNA polymerase, post-ribosomal frameshift
EPI_ISL_426074	21575	C	T	21553	29876	S	L5F	SNP	Spike
EPI_ISL_426074	23403	A	G	23381	29876	S	D614G	SNP	Spike
EPI_ISL_426074	25563	G	T	25541	29876	ORF3a	Q57H	SNP	ORF3a protein
EPI_ISL_426074	27964	C	T	27942	29876	ORF8	S24L	SNP	ORF8 protein
EPI_ISL_426136	36	C	T	26	29893	5'UTR	36	extragenic	NA
EPI_ISL_426136	241	C	T	231	29893	5'UTR	241	extragenic	NA
EPI_ISL_426136	1059	C	T	1049	29893	NSP2	T85I	SNP	Non-Structural protein 2
EPI_ISL_426136	3037	C	T	3027	29893	NSP3	F106F	SNP_silent	Predicted phosphoesterase, papain-like proteinase
EPI_ISL_426136	4113	C	T	4103	29893	NSP3	A465V	SNP	Predicted phosphoesterase, papain-like proteinase
EPI_ISL_426136	14408	C	T	14398	29893	NSP12b	P314L	SNP	RNA-dependent RNA polymerase, post-ribosomal frameshift
EPI_ISL_426136	23403	A	G	23393	29893	S	D614G	SNP	Spike
EPI_ISL_426136	25563	G	T	25553	29893	ORF3a	Q57H	SNP	ORF3a protein
EPI_ISL_426137	36	C	T	7	29833	5'UTR	36	extragenic	NA
EPI_ISL_426137	241	C	T	212	29833	5'UTR	241	extragenic	NA
EPI_ISL_426137	1059	C	T	1030	29833	NSP2	T85I	SNP	Non-Structural protein 2
EPI_ISL_426137	3037	C	T	3008	29833	NSP3	F106F	SNP_silent	Predicted phosphoesterase, papain-like proteinase
EPI_ISL_426137	14408	C	T	14379	29833	NSP12b	P314L	SNP	RNA-dependent RNA polymerase, post-ribosomal frameshift
EPI_ISL_426137	23403	A	G	23374	29833	S	D614G	SNP	Spike
EPI_ISL_426137	25563	G	T	25534	29833	ORF3a	Q57H	SNP	ORF3a protein
EPI_ISL_427161	36	C	T	6	29873	5'UTR	36	extragenic	NA
EPI_ISL_427161	6691	T	C	6661	29873	NSP3	A1324A	SNP_silent	Predicted phosphoesterase, papain-like proteinase
EPI_ISL_427161	7843	C	T	7813	29873	NSP3	N1708N	SNP_silent	Predicted phosphoesterase, papain-like proteinase
EPI_ISL_427161	7936	G	T	7906	29873	NSP3	A1739A	SNP_silent	Predicted phosphoesterase, papain-like proteinase
EPI_ISL_427161	11083	G	T	11053	29873	NSP6	L37F	SNP	Transmembrane protein
EPI_ISL_427161	13768	A	G	13738	29873	NSP12b	M101V	SNP	RNA-dependent RNA polymerase, post-ribosomal frameshift
EPI_ISL_427161	14805	C	T	14775	29873	NSP12b	Y446Y	SNP_silent	RNA-dependent RNA polymerase, post-ribosomal frameshift
EPI_ISL_427161	15869	A	T	15839	29873	NSP12b	H801L	SNP	RNA-dependent RNA polymerase, post-ribosomal frameshift
EPI_ISL_427161	17247	T	C	17217	29873	NSP13	R337R	SNP_silent	Helicase
EPI_ISL_427161	17639	C	T	17609	29873	NSP13	S468L	SNP	Helicase
EPI_ISL_427161	26144	G	T	26114	29873	ORF3a	G251V	SNP	ORF3a protein
EPI_ISL_427161	28693	T	C	28663	29873	N	N140N	SNP_silent	Nucleocapsid protein
EPI_ISL_427161	28915	C	T	28885	29873	N	G214G	SNP_silent	Nucleocapsid protein
EPI_ISL_427161	29867	TG	AA	29837	29873	3'UTR	29867	extragenic	NA
EPI_ISL_427161	29870	C	A	29840	29873	3'UTR	29870	extragenic	NA
EPI_ISL_427162	36	C	T	7	29841	5'UTR	36	extragenic	NA
EPI_ISL_427162	241	C	T	212	29841	5'UTR	241	extragenic	NA
EPI_ISL_427162	1059	C	T	1030	29841	NSP2	T85I	SNP	Non-Structural protein 2
EPI_ISL_427162	3037	C	T	3008	29841	NSP3	F106F	SNP_silent	Predicted phosphoesterase, papain-like proteinase
EPI_ISL_427162	6361	C	T	6332	29841	NSP3	D1214D	SNP_silent	Predicted phosphoesterase, papain-like proteinase
EPI_ISL_427162	10632	C	T	10603	29841	NSP5	A193V	SNP	3C-like proteinase
EPI_ISL_427162	14408	C	T	14379	29841	NSP12b	P314L	SNP	RNA-dependent RNA polymerase, post-ribosomal frameshift
EPI_ISL_427162	16260	C	T	16231	29841	NSP13	C8C	SNP_silent	Helicase
EPI_ISL_427162	23403	A	G	23374	29841	S	D614G	SNP	Spike
EPI_ISL_427162	25563	G	T	25534	29841	ORF3a	Q57H	SNP	ORF3a protein
EPI_ISL_427162	28821	C	A	28792	29841	N	S183Y	SNP	Nucleocapsid protein
EPI_ISL_427164	36	C	T	5	29868	5'UTR	36	extragenic	NA
EPI_ISL_427164	241	C	T	210	29868	5'UTR	241	extragenic	NA
EPI_ISL_427164	1059	C	T	1028	29868	NSP2	T85I	SNP	Non-Structural protein 2
EPI_ISL_427164	3037	C	T	3006	29868	NSP3	F106F	SNP_silent	Predicted phosphoesterase, papain-like proteinase
EPI_ISL_427164	10479	A	G	10448	29868	NSP5	N142S	SNP	3C-like proteinase
EPI_ISL_427164	14408	C	T	14377	29868	NSP12b	P314L	SNP	RNA-dependent RNA polymerase, post-ribosomal frameshift
EPI_ISL_427164	21137	A	G	21106	29868	NSP16	K160R	SNP	2'-O-ribose methyltransferase
EPI_ISL_427164	23403	A	G	23372	29868	S	D614G	SNP	Spike
EPI_ISL_427164	25563	G	T	25532	29868	ORF3a	Q57H	SNP	ORF3a protein
EPI_ISL_427164	28191	G	T	28160	29868	ORF8	V100L	SNP	ORF8 protein
EPI_ISL_427164	29296	C	T	29265	29868	N	D341D	SNP_silent	Nucleocapsid protein
EPI_ISL_427166	36	C	T	27	29855	5'UTR	36	extragenic	NA
EPI_ISL_427166	241	C	T	232	29855	5'UTR	241	extragenic	NA
EPI_ISL_427166	1059	C	T	1050	29855	NSP2	T85I	SNP	Non-Structural protein 2
EPI_ISL_427166	3037	C	T	3028	29855	NSP3	F106F	SNP_silent	Predicted phosphoesterase, papain-like proteinase
EPI_ISL_427166	11224	C	T	11215	29855	NSP6	V84V	SNP_silent	Transmembrane protein
EPI_ISL_427166	14408	C	T	14399	29855	NSP12b	P314L	SNP	RNA-dependent RNA polymerase, post-ribosomal frameshift
EPI_ISL_427166	23403	A	G	23394	29855	S	D614G	SNP	Spike
EPI_ISL_427166	25563	G	T	25554	29855	ORF3a	Q57H	SNP	ORF3a protein
EPI_ISL_427170	36	C	T	12	29852	5'UTR	36	extragenic	NA
EPI_ISL_427170	241	C	T	217	29852	5'UTR	241	extragenic	NA
EPI_ISL_427170	833	T	C	809	29852	NSP2	F10L	SNP	Non-Structural protein 2
EPI_ISL_427170	1059	C	T	1035	29852	NSP2	T85I	SNP	Non-Structural protein 2
EPI_ISL_427170	3037	C	T	3013	29852	NSP3	F106F	SNP_silent	Predicted phosphoesterase, papain-like proteinase
EPI_ISL_427170	14408	C	T	14384	29852	NSP12b	P314L	SNP	RNA-dependent RNA polymerase, post-ribosomal frameshift
EPI_ISL_427170	23403	A	G	23379	29852	S	D614G	SNP	Spike
EPI_ISL_427170	25563	G	T	25539	29852	ORF3a	Q57H	SNP	ORF3a protein
EPI_ISL_427170	27964	C	T	27940	29852	ORF8	S24L	SNP	ORF8 protein
EPI_ISL_427172	36	C	T	36	29910	5'UTR	36	extragenic	NA
EPI_ISL_427172	241	C	T	241	29910	5'UTR	241	extragenic	NA
EPI_ISL_427172	1059	C	T	1059	29910	NSP2	T85I	SNP	Non-Structural protein 2
EPI_ISL_427172	3037	C	T	3037	29910	NSP3	F106F	SNP_silent	Predicted phosphoesterase, papain-like proteinase
EPI_ISL_427172	14408	C	T	14408	29910	NSP12b	P314L	SNP	RNA-dependent RNA polymerase, post-ribosomal frameshift
EPI_ISL_427172	16947	A	G	16947	29910	NSP13	A237A	SNP_silent	Helicase
EPI_ISL_427172	23403	A	G	23403	29910	S	D614G	SNP	Spike
EPI_ISL_427172	25563	G	T	25563	29910	ORF3a	Q57H	SNP	ORF3a protein
EPI_ISL_427173	36	C	T	6	29873	5'UTR	36	extragenic	NA
EPI_ISL_427173	241	C	T	211	29873	5'UTR	241	extragenic	NA
EPI_ISL_427173	1059	C	T	1029	29873	NSP2	T85I	SNP	Non-Structural protein 2
EPI_ISL_427173	3037	C	T	3007	29873	NSP3	F106F	SNP_silent	Predicted phosphoesterase, papain-like proteinase
EPI_ISL_427173	14408	C	T	14378	29873	NSP12b	P314L	SNP	RNA-dependent RNA polymerase, post-ribosomal frameshift
EPI_ISL_427173	23403	A	G	23373	29873	S	D614G	SNP	Spike
EPI_ISL_427173	25563	G	T	25533	29873	ORF3a	Q57H	SNP	ORF3a protein
EPI_ISL_427173	29862	G	A	29832	29873	3'UTR	29862	extragenic	NA
EPI_ISL_427173	29864	G	A	29834	29873	3'UTR	29864	extragenic	NA
EPI_ISL_427173	29867	TG	AA	29837	29873	3'UTR	29867	extragenic	NA
EPI_ISL_427173	29870	C	A	29840	29873	3'UTR	29870	extragenic	NA
EPI_ISL_427181	36	C	T	5	29831	5'UTR	36	extragenic	NA
EPI_ISL_427181	241	C	T	210	29831	5'UTR	241	extragenic	NA
EPI_ISL_427181	1059	C	T	1028	29831	NSP2	T85I	SNP	Non-Structural protein 2
EPI_ISL_427181	2397	C	T	2366	29831	NSP2	T531M	SNP	Non-Structural protein 2
EPI_ISL_427181	3037	C	T	3006	29831	NSP3	F106F	SNP_silent	Predicted phosphoesterase, papain-like proteinase
EPI_ISL_427181	14408	C	T	14377	29831	NSP12b	P314L	SNP	RNA-dependent RNA polymerase, post-ribosomal frameshift
EPI_ISL_427181	23403	A	G	23372	29831	S	D614G	SNP	Spike
EPI_ISL_427181	25563	G	T	25532	29831	ORF3a	Q57H	SNP	ORF3a protein
EPI_ISL_427181	27630	C	T	27599	29831	ORF7a	A79A	SNP_silent	ORF7a protein
EPI_ISL_427181	29553	G	A	29522	29831	3'UTR	29553	extragenic	NA
EPI_ISL_427182	36	C	T	6	29834	5'UTR	36	extragenic	NA
EPI_ISL_427182	8782	C	T	8752	29834	NSP4	S76S	SNP_silent	Transmembrane protein
EPI_ISL_427182	17747	C	T	17717	29834	NSP13	P504L	SNP	Helicase
EPI_ISL_427182	17858	A	G	17828	29834	NSP13	Y541C	SNP	Helicase
EPI_ISL_427182	18060	C	T	18030	29834	NSP14	L7L	SNP_silent	3'-to-5' exonuclease
EPI_ISL_427182	21255	G	C	21225	29834	NSP16	A199A	SNP_silent	2'-O-ribose methyltransferase
EPI_ISL_427182	21575	C	T	21545	29834	S	L5F	SNP	Spike
EPI_ISL_427182	28144	T	C	28114	29834	ORF8	L84S	SNP	ORF8 protein
EPI_ISL_427184	36	C	T	35	29875	5'UTR	36	extragenic	NA
EPI_ISL_427184	241	C	T	240	29875	5'UTR	241	extragenic	NA
EPI_ISL_427184	1059	C	T	1058	29875	NSP2	T85I	SNP	Non-Structural protein 2
EPI_ISL_427184	3037	C	T	3036	29875	NSP3	F106F	SNP_silent	Predicted phosphoesterase, papain-like proteinase
EPI_ISL_427184	7765	C	T	7764	29875	NSP3	S1682S	SNP_silent	Predicted phosphoesterase, papain-like proteinase
EPI_ISL_427184	10846	G	T	10845	29875	NSP5	M264I	SNP	3C-like proteinase
EPI_ISL_427184	14408	C	T	14407	29875	NSP12b	P314L	SNP	RNA-dependent RNA polymerase, post-ribosomal frameshift
EPI_ISL_427184	19488	C	T	19487	29875	NSP14	V483V	SNP_silent	3'-to-5' exonuclease
EPI_ISL_427184	23403	A	G	23402	29875	S	D614G	SNP	Spike
EPI_ISL_427184	25563	G	T	25562	29875	ORF3a	Q57H	SNP	ORF3a protein
EPI_ISL_427189	36	C	T	5	29833	5'UTR	36	extragenic	NA
EPI_ISL_427189	241	C	T	210	29833	5'UTR	241	extragenic	NA
EPI_ISL_427189	1059	C	T	1028	29833	NSP2	T85I	SNP	Non-Structural protein 2
EPI_ISL_427189	3037	C	T	3006	29833	NSP3	F106F	SNP_silent	Predicted phosphoesterase, papain-like proteinase
EPI_ISL_427189	14408	C	T	14377	29833	NSP12b	P314L	SNP	RNA-dependent RNA polymerase, post-ribosomal frameshift
EPI_ISL_427189	23147	A	G	23116	29833	S	K529E	SNP	Spike
EPI_ISL_427189	23403	A	G	23372	29833	S	D614G	SNP	Spike
EPI_ISL_427189	25563	G	T	25532	29833	ORF3a	Q57H	SNP	ORF3a protein
EPI_ISL_427189	29553	G	A	29522	29833	3'UTR	29553	extragenic	NA
EPI_ISL_427190	36	C	T	26	29862	5'UTR	36	extragenic	NA
EPI_ISL_427190	490	T	A	480	29862	NSP1	D75E	SNP	Leader protein
EPI_ISL_427190	1399	A	G	1389	29862	NSP2	V198V	SNP_silent	Non-Structural protein 2
EPI_ISL_427190	3177	C	T	3167	29862	NSP3	P153L	SNP	Predicted phosphoesterase, papain-like proteinase
EPI_ISL_427190	6040	C	T	6030	29862	NSP3	F1107F	SNP_silent	Predicted phosphoesterase, papain-like proteinase
EPI_ISL_427190	8782	C	T	8772	29862	NSP4	S76S	SNP_silent	Transmembrane protein
EPI_ISL_427190	12478	G	A	12468	29862	NSP8	M129I	SNP	Non-Structural Protein 8
EPI_ISL_427190	18736	T	C	18726	29862	NSP14	F233L	SNP	3'-to-5' exonuclease
EPI_ISL_427190	24034	C	T	24024	29862	S	N824N	SNP_silent	Spike
EPI_ISL_427190	25803	C	T	25793	29862	ORF3a	N137N	SNP_silent	ORF3a protein
EPI_ISL_427190	26729	T	C	26719	29862	M	A69A	SNP_silent	Membrane
EPI_ISL_427190	28077	G	C	28067	29862	ORF8	V62L	SNP	ORF8 protein
EPI_ISL_427190	28144	T	C	28134	29862	ORF8	L84S	SNP	ORF8 protein
EPI_ISL_427190	28896	C	G	28886	29862	N	A208G	SNP	Nucleocapsid protein
EPI_ISL_427190	28985	G	T	28975	29862	N	G238C	SNP	Nucleocapsid protein
EPI_ISL_427190	29012	A	G	29002	29862	N	T247A	SNP	Nucleocapsid protein
EPI_ISL_427190	29700	A	G	29690	29862	3'UTR	29700	extragenic	NA
EPI_ISL_427191	36	C	T	7	29835	5'UTR	36	extragenic	NA
EPI_ISL_427191	241	C	T	212	29835	5'UTR	241	extragenic	NA
EPI_ISL_427191	1059	C	T	1030	29835	NSP2	T85I	SNP	Non-Structural protein 2
EPI_ISL_427191	3037	C	T	3008	29835	NSP3	F106F	SNP_silent	Predicted phosphoesterase, papain-like proteinase
EPI_ISL_427191	14408	C	T	14379	29835	NSP12b	P314L	SNP	RNA-dependent RNA polymerase, post-ribosomal frameshift
EPI_ISL_427191	23403	A	G	23374	29835	S	D614G	SNP	Spike
EPI_ISL_427191	25563	G	T	25534	29835	ORF3a	Q57H	SNP	ORF3a protein
EPI_ISL_427191	29553	G	A	29524	29835	3'UTR	29553	extragenic	NA
EPI_ISL_427192	36	C	T	4	29832	5'UTR	36	extragenic	NA
EPI_ISL_427192	241	C	T	209	29832	5'UTR	241	extragenic	NA
EPI_ISL_427192	1059	C	T	1027	29832	NSP2	T85I	SNP	Non-Structural protein 2
EPI_ISL_427192	3037	C	T	3005	29832	NSP3	F106F	SNP_silent	Predicted phosphoesterase, papain-like proteinase
EPI_ISL_427192	4975	G	T	4943	29832	NSP3	V752V	SNP_silent	Predicted phosphoesterase, papain-like proteinase
EPI_ISL_427192	14408	C	T	14376	29832	NSP12b	P314L	SNP	RNA-dependent RNA polymerase, post-ribosomal frameshift
EPI_ISL_427192	23403	A	G	23371	29832	S	D614G	SNP	Spike
EPI_ISL_427192	25523	G	T	25491	29832	ORF3a	G44V	SNP	ORF3a protein
EPI_ISL_427192	25563	G	T	25531	29832	ORF3a	Q57H	SNP	ORF3a protein
EPI_ISL_427192	27869	T	C	27837	29832	ORF7b	N38N	SNP_silent	ORF7b protein
EPI_ISL_427194	36	C	T	30	29892	5'UTR	36	extragenic	NA
EPI_ISL_427194	241	C	T	235	29892	5'UTR	241	extragenic	NA
EPI_ISL_427194	1059	C	T	1053	29892	NSP2	T85I	SNP	Non-Structural protein 2
EPI_ISL_427194	3037	C	T	3031	29892	NSP3	F106F	SNP_silent	Predicted phosphoesterase, papain-like proteinase
EPI_ISL_427194	6312	C	T	6306	29892	NSP3	T1198I	SNP	Predicted phosphoesterase, papain-like proteinase
EPI_ISL_427194	14408	C	T	14402	29892	NSP12b	P314L	SNP	RNA-dependent RNA polymerase, post-ribosomal frameshift
EPI_ISL_427194	23403	A	G	23397	29892	S	D614G	SNP	Spike
EPI_ISL_427194	25563	G	T	25557	29892	ORF3a	Q57H	SNP	ORF3a protein
EPI_ISL_427194	29553	G	A	29547	29892	3'UTR	29553	extragenic	NA
EPI_ISL_427195	36	C	T	30	29866	5'UTR	36	extragenic	NA
EPI_ISL_427195	8782	C	T	8776	29866	NSP4	S76S	SNP_silent	Transmembrane protein
EPI_ISL_427195	17747	C	T	17741	29866	NSP13	P504L	SNP	Helicase
EPI_ISL_427195	17858	A	G	17852	29866	NSP13	Y541C	SNP	Helicase
EPI_ISL_427195	18060	C	T	18054	29866	NSP14	L7L	SNP_silent	3'-to-5' exonuclease
EPI_ISL_427195	28144	T	C	28138	29866	ORF8	L84S	SNP	ORF8 protein
EPI_ISL_427197	36	C	T	26	29860	5'UTR	36	extragenic	NA
EPI_ISL_427197	241	C	T	231	29860	5'UTR	241	extragenic	NA
EPI_ISL_427197	1059	C	T	1049	29860	NSP2	T85I	SNP	Non-Structural protein 2
EPI_ISL_427197	3037	C	T	3027	29860	NSP3	F106F	SNP_silent	Predicted phosphoesterase, papain-like proteinase
EPI_ISL_427197	14408	C	T	14398	29860	NSP12b	P314L	SNP	RNA-dependent RNA polymerase, post-ribosomal frameshift
EPI_ISL_427197	23403	A	G	23393	29860	S	D614G	SNP	Spike
EPI_ISL_427197	25563	G	T	25553	29860	ORF3a	Q57H	SNP	ORF3a protein
EPI_ISL_427197	29553	G	A	29543	29860	3'UTR	29553	extragenic	NA
EPI_ISL_427199	36	C	T	23	29851	5'UTR	36	extragenic	NA
EPI_ISL_427199	241	C	T	228	29851	5'UTR	241	extragenic	NA
EPI_ISL_427199	1059	C	T	1046	29851	NSP2	T85I	SNP	Non-Structural protein 2
EPI_ISL_427199	3037	C	T	3024	29851	NSP3	F106F	SNP_silent	Predicted phosphoesterase, papain-like proteinase
EPI_ISL_427199	14408	C	T	14395	29851	NSP12b	P314L	SNP	RNA-dependent RNA polymerase, post-ribosomal frameshift
EPI_ISL_427199	23403	A	G	23390	29851	S	D614G	SNP	Spike
EPI_ISL_427199	25563	G	T	25550	29851	ORF3a	Q57H	SNP	ORF3a protein
EPI_ISL_427199	29553	G	A	29540	29851	3'UTR	29553	extragenic	NA
EPI_ISL_427200	36	C	T	6	29842	5'UTR	36	extragenic	NA
EPI_ISL_427200	241	C	T	211	29842	5'UTR	241	extragenic	NA
EPI_ISL_427200	1059	C	T	1029	29842	NSP2	T85I	SNP	Non-Structural protein 2
EPI_ISL_427200	3037	C	T	3007	29842	NSP3	F106F	SNP_silent	Predicted phosphoesterase, papain-like proteinase
EPI_ISL_427200	14408	C	T	14378	29842	NSP12b	P314L	SNP	RNA-dependent RNA polymerase, post-ribosomal frameshift
EPI_ISL_427200	23403	A	G	23373	29842	S	D614G	SNP	Spike
EPI_ISL_427200	25563	G	T	25533	29842	ORF3a	Q57H	SNP	ORF3a protein
EPI_ISL_427200	28472	C	T	28442	29842	N	P67S	SNP	Nucleocapsid protein
EPI_ISL_427200	29553	G	A	29523	29842	3'UTR	29553	extragenic	NA
EPI_ISL_427203	36	C	T	6	29869	5'UTR	36	extragenic	NA
EPI_ISL_427203	8782	C	T	8752	29869	NSP4	S76S	SNP_silent	Transmembrane protein
EPI_ISL_427203	17747	C	T	17717	29869	NSP13	P504L	SNP	Helicase
EPI_ISL_427203	17858	A	G	17828	29869	NSP13	Y541C	SNP	Helicase
EPI_ISL_427203	18060	C	T	18030	29869	NSP14	L7L	SNP_silent	3'-to-5' exonuclease
EPI_ISL_427203	28144	T	C	28114	29869	ORF8	L84S	SNP	ORF8 protein
EPI_ISL_427205	36	C	T	5	29833	5'UTR	36	extragenic	NA
EPI_ISL_427205	241	C	T	210	29833	5'UTR	241	extragenic	NA
EPI_ISL_427205	1059	C	T	1028	29833	NSP2	T85I	SNP	Non-Structural protein 2
EPI_ISL_427205	3037	C	T	3006	29833	NSP3	F106F	SNP_silent	Predicted phosphoesterase, papain-like proteinase
EPI_ISL_427205	14408	C	T	14377	29833	NSP12b	P314L	SNP	RNA-dependent RNA polymerase, post-ribosomal frameshift
EPI_ISL_427205	23403	A	G	23372	29833	S	D614G	SNP	Spike
EPI_ISL_427205	25563	G	T	25532	29833	ORF3a	Q57H	SNP	ORF3a protein
EPI_ISL_427205	29553	G	A	29522	29833	3'UTR	29553	extragenic	NA
EPI_ISL_427208	36	C	T	5	29883	5'UTR	36	extragenic	NA
EPI_ISL_427208	2334	C	T	2303	29883	NSP2	A510V	SNP	Non-Structural protein 2
EPI_ISL_427208	8782	C	T	8751	29883	NSP4	S76S	SNP_silent	Transmembrane protein
EPI_ISL_427208	17747	C	T	17716	29883	NSP13	P504L	SNP	Helicase
EPI_ISL_427208	17858	A	G	17827	29883	NSP13	Y541C	SNP	Helicase
EPI_ISL_427208	18060	C	T	18029	29883	NSP14	L7L	SNP_silent	3'-to-5' exonuclease
EPI_ISL_427208	26152	G	T	26121	29883	ORF3a	G254*	SNP_stop	ORF3a protein
EPI_ISL_427208	28144	T	C	28113	29883	ORF8	L84S	SNP	ORF8 protein
EPI_ISL_427208	29862	GA	.	29830	29883	3'UTR	29862	extragenic	NA
EPI_ISL_427210	36	C	T	35	29920	5'UTR	36	extragenic	NA
EPI_ISL_427210	241	C	T	240	29920	5'UTR	241	extragenic	NA
EPI_ISL_427210	1059	C	T	1058	29920	NSP2	T85I	SNP	Non-Structural protein 2
EPI_ISL_427210	3037	C	T	3036	29920	NSP3	F106F	SNP_silent	Predicted phosphoesterase, papain-like proteinase
EPI_ISL_427210	6548	C	T	6547	29920	NSP3	D1276D	SNP_silent	Predicted phosphoesterase, papain-like proteinase
EPI_ISL_427210	11595	A	G	11594	29920	NSP6	Q208R	SNP	Transmembrane protein
EPI_ISL_427210	14408	C	T	14407	29920	NSP12b	P314L	SNP	RNA-dependent RNA polymerase, post-ribosomal frameshift
EPI_ISL_427210	23403	A	G	23402	29920	S	D614G	SNP	Spike
EPI_ISL_427210	24348	G	T	24347	29920	S	S929I	SNP	Spike
EPI_ISL_427210	25563	G	T	25562	29920	ORF3a	Q57H	SNP	ORF3a protein
EPI_ISL_427210	29553	G	A	29552	29920	3'UTR	29553	extragenic	NA
EPI_ISL_427210	29864	G	A	29863	29920	3'UTR	29864	extragenic	NA
EPI_ISL_427210	29867	TG	AA	29866	29920	3'UTR	29867	extragenic	NA
EPI_ISL_427210	29870	C	A	29869	29920	3'UTR	29870	extragenic	NA
EPI_ISL_427211	36	C	T	22	29847	5'UTR	36	extragenic	NA
EPI_ISL_427211	241	C	T	227	29847	5'UTR	241	extragenic	NA
EPI_ISL_427211	1059	C	T	1045	29847	NSP2	T85I	SNP	Non-Structural protein 2
EPI_ISL_427211	3037	C	T	3023	29847	NSP3	F106F	SNP_silent	Predicted phosphoesterase, papain-like proteinase
EPI_ISL_427211	6040	C	T	6026	29847	NSP3	F1107F	SNP_silent	Predicted phosphoesterase, papain-like proteinase
EPI_ISL_427211	14408	C	T	14394	29847	NSP12b	P314L	SNP	RNA-dependent RNA polymerase, post-ribosomal frameshift
EPI_ISL_427211	23403	A	G	23389	29847	S	D614G	SNP	Spike
EPI_ISL_427211	25563	G	T	25549	29847	ORF3a	Q57H	SNP	ORF3a protein
EPI_ISL_427211	26157	TGT	.	26142	29847	ORF3a	V256	deletion	ORF3a protein
EPI_ISL_427212	36	C	T	36	29903	5'UTR	36	extragenic	NA
EPI_ISL_427212	241	C	T	241	29903	5'UTR	241	extragenic	NA
EPI_ISL_427212	379	C	A	379	29903	NSP1	V38V	SNP_silent	Leader protein
EPI_ISL_427212	1059	C	T	1059	29903	NSP2	T85I	SNP	Non-Structural protein 2
EPI_ISL_427212	2244	T	C	2244	29903	NSP2	V480A	SNP	Non-Structural protein 2
EPI_ISL_427212	3037	C	T	3037	29903	NSP3	F106F	SNP_silent	Predicted phosphoesterase, papain-like proteinase
EPI_ISL_427212	10761	A	G	10761	29903	NSP5	K236R	SNP	3C-like proteinase
EPI_ISL_427212	14408	C	T	14408	29903	NSP12b	P314L	SNP	RNA-dependent RNA polymerase, post-ribosomal frameshift
EPI_ISL_427212	23403	A	G	23403	29903	S	D614G	SNP	Spike
EPI_ISL_427212	23865	C	T	23865	29903	S	T768I	SNP	Spike
EPI_ISL_427212	25563	G	T	25563	29903	ORF3a	Q57H	SNP	ORF3a protein
EPI_ISL_427212	29862	G	A	29862	29903	3'UTR	29862	extragenic	NA
EPI_ISL_427212	29864	G	A	29864	29903	3'UTR	29864	extragenic	NA
EPI_ISL_427212	29867	TG	AA	29867	29903	3'UTR	29867	extragenic	NA
EPI_ISL_427212	29870	C	A	29870	29903	3'UTR	29870	extragenic	NA
EPI_ISL_427215	36	C	T	6	29891	5'UTR	36	extragenic	NA
EPI_ISL_427215	241	C	T	211	29891	5'UTR	241	extragenic	NA
EPI_ISL_427215	1059	C	T	1029	29891	NSP2	T85I	SNP	Non-Structural protein 2
EPI_ISL_427215	3037	C	T	3007	29891	NSP3	F106F	SNP_silent	Predicted phosphoesterase, papain-like proteinase
EPI_ISL_427215	11083	G	T	11053	29891	NSP6	L37F	SNP	Transmembrane protein
EPI_ISL_427215	14408	C	T	14378	29891	NSP12b	P314L	SNP	RNA-dependent RNA polymerase, post-ribosomal frameshift
EPI_ISL_427215	23403	A	G	23373	29891	S	D614G	SNP	Spike
EPI_ISL_427215	25563	G	T	25533	29891	ORF3a	Q57H	SNP	ORF3a protein
EPI_ISL_427215	29553	G	A	29523	29891	3'UTR	29553	extragenic	NA
EPI_ISL_427215	29862	G	A	29832	29891	3'UTR	29862	extragenic	NA
EPI_ISL_427215	29864	G	A	29834	29891	3'UTR	29864	extragenic	NA
EPI_ISL_427215	29867	TG	AA	29837	29891	3'UTR	29867	extragenic	NA
EPI_ISL_427215	29870	C	A	29840	29891	3'UTR	29870	extragenic	NA
EPI_ISL_427217	36	C	T	31	29867	5'UTR	36	extragenic	NA
EPI_ISL_427217	241	C	T	236	29867	5'UTR	241	extragenic	NA
EPI_ISL_427217	1059	C	T	1054	29867	NSP2	T85I	SNP	Non-Structural protein 2
EPI_ISL_427217	3037	C	T	3032	29867	NSP3	F106F	SNP_silent	Predicted phosphoesterase, papain-like proteinase
EPI_ISL_427217	14408	C	T	14403	29867	NSP12b	P314L	SNP	RNA-dependent RNA polymerase, post-ribosomal frameshift
EPI_ISL_427217	23403	A	G	23398	29867	S	D614G	SNP	Spike
EPI_ISL_427217	25096	C	T	25091	29867	S	N1178N	SNP_silent	Spike
EPI_ISL_427217	25563	G	T	25558	29867	ORF3a	Q57H	SNP	ORF3a protein
EPI_ISL_427222	36	C	T	7	29835	5'UTR	36	extragenic	NA
EPI_ISL_427222	241	C	T	212	29835	5'UTR	241	extragenic	NA
EPI_ISL_427222	1059	C	T	1030	29835	NSP2	T85I	SNP	Non-Structural protein 2
EPI_ISL_427222	3037	C	T	3008	29835	NSP3	F106F	SNP_silent	Predicted phosphoesterase, papain-like proteinase
EPI_ISL_427222	7728	C	A	7699	29835	NSP3	S1670Y	SNP	Predicted phosphoesterase, papain-like proteinase
EPI_ISL_427222	14408	C	T	14379	29835	NSP12b	P314L	SNP	RNA-dependent RNA polymerase, post-ribosomal frameshift
EPI_ISL_427222	23403	A	G	23374	29835	S	D614G	SNP	Spike
EPI_ISL_427222	25563	G	T	25534	29835	ORF3a	Q57H	SNP	ORF3a protein
EPI_ISL_427222	29553	G	A	29524	29835	3'UTR	29553	extragenic	NA
EPI_ISL_427247	36	C	T	34	29862	5'UTR	36	extragenic	NA
EPI_ISL_427247	241	C	T	239	29862	5'UTR	241	extragenic	NA
EPI_ISL_427247	1059	C	T	1057	29862	NSP2	T85I	SNP	Non-Structural protein 2
EPI_ISL_427247	3037	C	T	3035	29862	NSP3	F106F	SNP_silent	Predicted phosphoesterase, papain-like proteinase
EPI_ISL_427247	14408	C	T	14406	29862	NSP12b	P314L	SNP	RNA-dependent RNA polymerase, post-ribosomal frameshift
EPI_ISL_427247	23403	A	G	23401	29862	S	D614G	SNP	Spike
EPI_ISL_427247	25563	G	T	25561	29862	ORF3a	Q57H	SNP	ORF3a protein
EPI_ISL_427247	27804	C	T	27802	29862	ORF7b	F16F	SNP_silent	ORF7b protein
EPI_ISL_427247	29553	G	A	29551	29862	3'UTR	29553	extragenic	NA
EPI_ISL_427253	36	C	T	36	29872	5'UTR	36	extragenic	NA
EPI_ISL_427253	241	C	T	241	29872	5'UTR	241	extragenic	NA
EPI_ISL_427253	1059	C	T	1059	29872	NSP2	T85I	SNP	Non-Structural protein 2
EPI_ISL_427253	3037	C	T	3037	29872	NSP3	F106F	SNP_silent	Predicted phosphoesterase, papain-like proteinase
EPI_ISL_427253	12880	C	T	12880	29872	NSP9	I65I	SNP_silent	ssRNA-binding protein
EPI_ISL_427253	14408	C	T	14408	29872	NSP12b	P314L	SNP	RNA-dependent RNA polymerase, post-ribosomal frameshift
EPI_ISL_427253	20233	C	T	20233	29872	NSP15	P205S	SNP	endoRNAse
EPI_ISL_427253	23403	A	G	23403	29872	S	D614G	SNP	Spike
EPI_ISL_427253	25563	G	T	25563	29872	ORF3a	Q57H	SNP	ORF3a protein
EPI_ISL_427253	29553	G	A	29553	29872	3'UTR	29553	extragenic	NA
EPI_ISL_427254	36	C	T	25	29853	5'UTR	36	extragenic	NA
EPI_ISL_427254	241	C	T	230	29853	5'UTR	241	extragenic	NA
EPI_ISL_427254	1059	C	T	1048	29853	NSP2	T85I	SNP	Non-Structural protein 2
EPI_ISL_427254	3037	C	T	3026	29853	NSP3	F106F	SNP_silent	Predicted phosphoesterase, papain-like proteinase
EPI_ISL_427254	12880	C	T	12869	29853	NSP9	I65I	SNP_silent	ssRNA-binding protein
EPI_ISL_427254	14408	C	T	14397	29853	NSP12b	P314L	SNP	RNA-dependent RNA polymerase, post-ribosomal frameshift
EPI_ISL_427254	23403	A	G	23392	29853	S	D614G	SNP	Spike
EPI_ISL_427254	25563	G	T	25552	29853	ORF3a	Q57H	SNP	ORF3a protein
EPI_ISL_427254	29553	G	A	29542	29853	3'UTR	29553	extragenic	NA
EPI_ISL_416317	37	C	T	7	29836	5'UTR	37	extragenic	NA
EPI_ISL_416317	8782	C	T	8752	29836	NSP4	S76S	SNP_silent	Transmembrane protein
EPI_ISL_416317	28144	T	C	28114	29836	ORF8	L84S	SNP	ORF8 protein
EPI_ISL_416317	28878	G	A	28848	29836	N	S202N	SNP	Nucleocapsid protein
EPI_ISL_416317	29742	G	A	29712	29836	3'UTR	29742	extragenic	NA
EPI_ISL_420810	40	C	T	40	29903	5'UTR	40	extragenic	NA
EPI_ISL_420810	241	C	T	241	29903	5'UTR	241	extragenic	NA
EPI_ISL_420810	1059	C	T	1059	29903	NSP2	T85I	SNP	Non-Structural protein 2
EPI_ISL_420810	3037	C	T	3037	29903	NSP3	F106F	SNP_silent	Predicted phosphoesterase, papain-like proteinase
EPI_ISL_420810	14408	C	T	14408	29903	NSP12b	P314L	SNP	RNA-dependent RNA polymerase, post-ribosomal frameshift
EPI_ISL_420810	19366	C	T	19366	29903	NSP14	P443S	SNP	3'-to-5' exonuclease
EPI_ISL_420810	22468	G	T	22468	29903	S	T302T	SNP_silent	Spike
EPI_ISL_420810	23403	A	G	23403	29903	S	D614G	SNP	Spike
EPI_ISL_420810	23593	G	T	23593	29903	S	Q677H	SNP	Spike
EPI_ISL_420810	25250	G	T	25250	29903	S	V1230L	SNP	Spike
EPI_ISL_420810	25563	G	T	25563	29903	ORF3a	Q57H	SNP	ORF3a protein
EPI_ISL_420810	27964	C	T	27964	29903	ORF8	S24L	SNP	ORF8 protein
EPI_ISL_420810	29353	C	T	29353	29903	N	Y360Y	SNP_silent	Nucleocapsid protein
EPI_ISL_414937	41	T	C	24	29533	5'UTR	41	extragenic	NA
EPI_ISL_414937	61	G	A	44	29533	5'UTR	61	extragenic	NA
EPI_ISL_414937	85	T	G	68	29533	5'UTR	85	extragenic	NA
EPI_ISL_414937	3171	T	C	3154	29533	NSP3	L151P	SNP	Predicted phosphoesterase, papain-like proteinase
EPI_ISL_414937	8782	C	T	8765	29533	NSP4	S76S	SNP_silent	Transmembrane protein
EPI_ISL_414937	28144	T	C	28127	29533	ORF8	L84S	SNP	ORF8 protein
EPI_ISL_416651	42	T	.	35	29893	5'UTR	42	extragenic	NA
EPI_ISL_416651	6310	C	T	6303	29893	NSP3	S1197S	SNP_silent	Predicted phosphoesterase, papain-like proteinase
EPI_ISL_416651	8782	C	T	8775	29893	NSP4	S76S	SNP_silent	Transmembrane protein
EPI_ISL_416651	17747	C	T	17740	29893	NSP13	P504L	SNP	Helicase
EPI_ISL_416651	17858	A	G	17851	29893	NSP13	Y541C	SNP	Helicase
EPI_ISL_416651	18060	C	T	18053	29893	NSP14	L7L	SNP_silent	3'-to-5' exonuclease
EPI_ISL_416651	27327	G	T	27320	29893	ORF6	K42N	SNP	ORF6 protein
EPI_ISL_416651	28144	T	C	28137	29893	ORF8	L84S	SNP	ORF8 protein
EPI_ISL_416651	28378	G	T	28371	29893	N	A35A	SNP_silent	Nucleocapsid protein
EPI_ISL_420567	44	C	A	44	29899	5'UTR	44	extragenic	NA
EPI_ISL_420567	48	C	A	48	29899	5'UTR	48	extragenic	NA
EPI_ISL_420567	241	C	T	241	29899	5'UTR	241	extragenic	NA
EPI_ISL_420567	3037	C	T	3037	29899	NSP3	F106F	SNP_silent	Predicted phosphoesterase, papain-like proteinase
EPI_ISL_420567	14408	C	T	14408	29899	NSP12b	P314L	SNP	RNA-dependent RNA polymerase, post-ribosomal frameshift
EPI_ISL_420567	23403	A	G	23403	29899	S	D614G	SNP	Spike
EPI_ISL_420567	28881	GGG	AAC	28881	29899	N	RG203KR	SNP	Nucleocapsid protein
EPI_ISL_426051	46	A	G	14	29838	5'UTR	46	extragenic	NA
EPI_ISL_426051	48	C	T	16	29838	5'UTR	48	extragenic	NA
EPI_ISL_426051	241	C	T	209	29838	5'UTR	241	extragenic	NA
EPI_ISL_426051	541	C	T	509	29838	NSP1	L92L	SNP_silent	Leader protein
EPI_ISL_426051	1059	C	T	1027	29838	NSP2	T85I	SNP	Non-Structural protein 2
EPI_ISL_426051	3037	C	T	3005	29838	NSP3	F106F	SNP_silent	Predicted phosphoesterase, papain-like proteinase
EPI_ISL_426051	11083	G	T	11051	29838	NSP6	L37F	SNP	Transmembrane protein
EPI_ISL_426051	14408	C	T	14376	29838	NSP12b	P314L	SNP	RNA-dependent RNA polymerase, post-ribosomal frameshift
EPI_ISL_426051	17372	C	T	17340	29838	NSP13	A379V	SNP	Helicase
EPI_ISL_426051	22783	C	A	22751	29838	S	V407V	SNP_silent	Spike
EPI_ISL_426051	23403	A	G	23371	29838	S	D614G	SNP	Spike
EPI_ISL_426051	25563	G	T	25531	29838	ORF3a	Q57H	SNP	ORF3a protein
EPI_ISL_420583	48	C	A	48	29902	5'UTR	48	extragenic	NA
EPI_ISL_420583	241	C	T	241	29902	5'UTR	241	extragenic	NA
EPI_ISL_420583	3037	C	T	3037	29902	NSP3	F106F	SNP_silent	Predicted phosphoesterase, papain-like proteinase
EPI_ISL_420583	14408	C	T	14408	29902	NSP12b	P314L	SNP	RNA-dependent RNA polymerase, post-ribosomal frameshift
EPI_ISL_420583	23403	A	G	23403	29902	S	D614G	SNP	Spike
EPI_ISL_420583	28881	GGG	AAC	28881	29902	N	RG203KR	SNP	Nucleocapsid protein
EPI_ISL_416336	49	T	A	16	29833	5'UTR	49	extragenic	NA
EPI_ISL_416336	14676	C	T	14643	29833	NSP12b	P403P	SNP_silent	RNA-dependent RNA polymerase, post-ribosomal frameshift
EPI_ISL_416336	28826	C	T	28793	29833	N	R185C	SNP	Nucleocapsid protein
EPI_ISL_427318	52	T	C	52	29903	5'UTR	52	extragenic	NA
EPI_ISL_427318	117	C	T	117	29903	5'UTR	117	extragenic	NA
EPI_ISL_427318	228	C	T	228	29903	5'UTR	228	extragenic	NA
EPI_ISL_427318	241	C	T	241	29903	5'UTR	241	extragenic	NA
EPI_ISL_427318	3037	C	T	3037	29903	NSP3	F106F	SNP_silent	Predicted phosphoesterase, papain-like proteinase
EPI_ISL_427318	14408	C	T	14408	29903	NSP12b	P314L	SNP	RNA-dependent RNA polymerase, post-ribosomal frameshift
EPI_ISL_427318	23403	A	G	23403	29903	S	D614G	SNP	Spike
EPI_ISL_427318	26750	C	T	26750	29903	M	I76I	SNP_silent	Membrane
EPI_ISL_427318	28881	GGG	AAC	28881	29903	N	RG203KR	SNP	Nucleocapsid protein
EPI_ISL_408488	54	T	.	53	29890	5'UTR	54	extragenic	NA
EPI_ISL_408488	58	T	A	57	29890	5'UTR	58	extragenic	NA
EPI_ISL_416403	54	T	A	24	29836	5'UTR	54	extragenic	NA
EPI_ISL_416403	8782	C	T	8752	29836	NSP4	S76S	SNP_silent	Transmembrane protein
EPI_ISL_416403	9370	T	G	9340	29836	NSP4	I272M	SNP	Transmembrane protein
EPI_ISL_416403	28144	T	C	28114	29836	ORF8	L84S	SNP	ORF8 protein
EPI_ISL_416403	28878	G	A	28848	29836	N	S202N	SNP	Nucleocapsid protein
EPI_ISL_416403	29742	G	A	29712	29836	3'UTR	29742	extragenic	NA
EPI_ISL_416654	54	.	C	49	29898	5'UTR	54	extragenic	NA
EPI_ISL_416654	6693	A	G	6688	29898	NSP3	K1325R	SNP	Predicted phosphoesterase, papain-like proteinase
EPI_ISL_416654	8782	C	T	8777	29898	NSP4	S76S	SNP_silent	Transmembrane protein
EPI_ISL_416654	17747	C	T	17742	29898	NSP13	P504L	SNP	Helicase
EPI_ISL_416654	17858	A	G	17853	29898	NSP13	Y541C	SNP	Helicase
EPI_ISL_416654	18060	C	T	18055	29898	NSP14	L7L	SNP_silent	3'-to-5' exonuclease
EPI_ISL_416654	28144	T	C	28139	29898	ORF8	L84S	SNP	ORF8 protein
EPI_ISL_416681	54	.	C	27	29876	5'UTR	54	extragenic	NA
EPI_ISL_416681	8782	C	T	8755	29876	NSP4	S76S	SNP_silent	Transmembrane protein
EPI_ISL_416681	17747	C	T	17720	29876	NSP13	P504L	SNP	Helicase
EPI_ISL_416681	17858	A	G	17831	29876	NSP13	Y541C	SNP	Helicase
EPI_ISL_416681	18060	C	T	18033	29876	NSP14	L7L	SNP_silent	3'-to-5' exonuclease
EPI_ISL_416681	28144	T	C	28117	29876	ORF8	L84S	SNP	ORF8 protein
EPI_ISL_416681	29869	A	T	29842	29876	3'UTR	29869	extragenic	NA
EPI_ISL_420592	54	T	A	54	29898	5'UTR	54	extragenic	NA
EPI_ISL_420592	241	C	T	241	29898	5'UTR	241	extragenic	NA
EPI_ISL_420592	3037	C	T	3037	29898	NSP3	F106F	SNP_silent	Predicted phosphoesterase, papain-like proteinase
EPI_ISL_420592	14408	C	T	14408	29898	NSP12b	P314L	SNP	RNA-dependent RNA polymerase, post-ribosomal frameshift
EPI_ISL_420592	23403	A	G	23403	29898	S	D614G	SNP	Spike
EPI_ISL_420592	28881	GGG	AAC	28881	29898	N	RG203KR	SNP	Nucleocapsid protein
EPI_ISL_416445	55	A	C	55	29864	5'UTR	55	extragenic	NA
EPI_ISL_416445	8782	C	T	8782	29864	NSP4	S76S	SNP_silent	Transmembrane protein
EPI_ISL_416445	17747	C	T	17747	29864	NSP13	P504L	SNP	Helicase
EPI_ISL_416445	17858	A	G	17858	29864	NSP13	Y541C	SNP	Helicase
EPI_ISL_416445	18060	C	T	18060	29864	NSP14	L7L	SNP_silent	3'-to-5' exonuclease
EPI_ISL_416445	28144	T	C	28144	29864	ORF8	L84S	SNP	ORF8 protein
EPI_ISL_418919	55	A	C	7	29866	5'UTR	55	extragenic	NA
EPI_ISL_418919	241	C	T	193	29866	5'UTR	241	extragenic	NA
EPI_ISL_418919	1059	C	T	1011	29866	NSP2	T85I	SNP	Non-Structural protein 2
EPI_ISL_418919	3037	C	T	2989	29866	NSP3	F106F	SNP_silent	Predicted phosphoesterase, papain-like proteinase
EPI_ISL_418919	14408	C	T	14360	29866	NSP12b	P314L	SNP	RNA-dependent RNA polymerase, post-ribosomal frameshift
EPI_ISL_418919	23403	A	G	23355	29866	S	D614G	SNP	Spike
EPI_ISL_418919	25563	G	T	25515	29866	ORF3a	Q57H	SNP	ORF3a protein
EPI_ISL_414558	61	G	T	7	29775	5'UTR	61	extragenic	NA
EPI_ISL_414558	1397	G	A	1343	29775	NSP2	V198I	SNP	Non-Structural protein 2
EPI_ISL_414558	3145	G	T	3091	29775	NSP3	L142F	SNP	Predicted phosphoesterase, papain-like proteinase
EPI_ISL_414558	11083	G	T	11029	29775	NSP6	L37F	SNP	Transmembrane protein
EPI_ISL_414558	20235	C	A	20181	29775	NSP15	P205P	SNP_silent	endoRNAse
EPI_ISL_414558	20787	T	C	20733	29775	NSP16	N43N	SNP_silent	2'-O-ribose methyltransferase
EPI_ISL_414558	22042	T	C	21988	29775	S	Y160Y	SNP_silent	Spike
EPI_ISL_414558	28688	T	C	28634	29775	N	A138A	SNP_silent	Nucleocapsid protein
EPI_ISL_414558	28835	T	C	28781	29775	N	S188P	SNP	Nucleocapsid protein
EPI_ISL_414558	29742	G	T	29688	29775	3'UTR	29742	extragenic	NA
EPI_ISL_416397	61	G	T	30	29835	5'UTR	61	extragenic	NA
EPI_ISL_416397	20692	C	T	20661	29835	NSP16	P12S	SNP	2'-O-ribose methyltransferase
EPI_ISL_416397	23533	C	T	23502	29835	S	N657N	SNP_silent	Spike
EPI_ISL_416397	26326	C	T	26295	29835	E	L27L	SNP_silent	Envelope
EPI_ISL_416397	28233	G	A	28202	29835	ORF8	V114I	SNP	ORF8 protein
EPI_ISL_417725	61	G	T	61	29903	5'UTR	61	extragenic	NA
EPI_ISL_417725	241	C	T	241	29903	5'UTR	241	extragenic	NA
EPI_ISL_417725	1059	C	T	1059	29903	NSP2	T85I	SNP	Non-Structural protein 2
EPI_ISL_417725	3037	C	T	3037	29903	NSP3	F106F	SNP_silent	Predicted phosphoesterase, papain-like proteinase
EPI_ISL_417725	6266	G	A	6266	29903	NSP3	A1183T	SNP	Predicted phosphoesterase, papain-like proteinase
EPI_ISL_417725	14408	C	T	14408	29903	NSP12b	P314L	SNP	RNA-dependent RNA polymerase, post-ribosomal frameshift
EPI_ISL_417725	23403	A	G	23403	29903	S	D614G	SNP	Spike
EPI_ISL_417725	25563	G	T	25563	29903	ORF3a	Q57H	SNP	ORF3a protein
EPI_ISL_418383	62	T	C	62	29882	5'UTR	62	extragenic	NA
EPI_ISL_418383	884	C	T	884	29882	NSP2	R27C	SNP	Non-Structural protein 2
EPI_ISL_418383	1397	G	A	1397	29882	NSP2	V198I	SNP	Non-Structural protein 2
EPI_ISL_418383	3040	C	T	3040	29882	NSP3	Y107Y	SNP_silent	Predicted phosphoesterase, papain-like proteinase
EPI_ISL_418383	8653	G	T	8653	29882	NSP4	M33I	SNP	Transmembrane protein
EPI_ISL_418383	11083	G	T	11083	29882	NSP6	L37F	SNP	Transmembrane protein
EPI_ISL_418383	28688	T	C	28688	29882	N	A138A	SNP_silent	Nucleocapsid protein
EPI_ISL_418383	29742	G	T	29742	29882	3'UTR	29742	extragenic	NA
EPI_ISL_424294	64	C	T	33	29833	5'UTR	64	extragenic	NA
EPI_ISL_424294	241	C	T	210	29833	5'UTR	241	extragenic	NA
EPI_ISL_424294	379	C	A	348	29833	NSP1	V38V	SNP_silent	Leader protein
EPI_ISL_424294	1059	C	T	1028	29833	NSP2	T85I	SNP	Non-Structural protein 2
EPI_ISL_424294	2244	T	C	2213	29833	NSP2	V480A	SNP	Non-Structural protein 2
EPI_ISL_424294	3037	C	T	3006	29833	NSP3	F106F	SNP_silent	Predicted phosphoesterase, papain-like proteinase
EPI_ISL_424294	11704	C	T	11673	29833	NSP6	Y244Y	SNP_silent	Transmembrane protein
EPI_ISL_424294	14408	C	T	14377	29833	NSP12b	P314L	SNP	RNA-dependent RNA polymerase, post-ribosomal frameshift
EPI_ISL_424294	23403	A	G	23372	29833	S	D614G	SNP	Spike
EPI_ISL_424294	25563	G	T	25532	29833	ORF3a	Q57H	SNP	ORF3a protein
EPI_ISL_417292	66	C	T	66	29903	5'UTR	66	extragenic	NA
EPI_ISL_417292	7334	C	T	7334	29903	NSP3	H1539Y	SNP	Predicted phosphoesterase, papain-like proteinase
EPI_ISL_417292	7479	A	G	7479	29903	NSP3	N1587S	SNP	Predicted phosphoesterase, papain-like proteinase
EPI_ISL_417292	11083	G	T	11083	29903	NSP6	L37F	SNP	Transmembrane protein
EPI_ISL_417292	14805	C	T	14805	29903	NSP12b	Y446Y	SNP_silent	RNA-dependent RNA polymerase, post-ribosomal frameshift
EPI_ISL_417292	15222	C	T	15222	29903	NSP12b	F585F	SNP_silent	RNA-dependent RNA polymerase, post-ribosomal frameshift
EPI_ISL_417292	17247	T	C	17247	29903	NSP13	R337R	SNP_silent	Helicase
EPI_ISL_417292	21575	C	T	21575	29903	S	L5F	SNP	Spike
EPI_ISL_417292	25572	C	T	25572	29903	ORF3a	S60S	SNP_silent	ORF3a protein
EPI_ISL_417292	26144	G	T	26144	29903	ORF3a	G251V	SNP	ORF3a protein
EPI_ISL_419928	66	C	T	62	29899	5'UTR	66	extragenic	NA
EPI_ISL_419928	7334	C	T	7330	29899	NSP3	H1539Y	SNP	Predicted phosphoesterase, papain-like proteinase
EPI_ISL_419928	7479	A	G	7475	29899	NSP3	N1587S	SNP	Predicted phosphoesterase, papain-like proteinase
EPI_ISL_419928	11083	G	T	11079	29899	NSP6	L37F	SNP	Transmembrane protein
EPI_ISL_419928	14805	C	T	14801	29899	NSP12b	Y446Y	SNP_silent	RNA-dependent RNA polymerase, post-ribosomal frameshift
EPI_ISL_419928	15222	C	T	15218	29899	NSP12b	F585F	SNP_silent	RNA-dependent RNA polymerase, post-ribosomal frameshift
EPI_ISL_419928	17247	T	C	17243	29899	NSP13	R337R	SNP_silent	Helicase
EPI_ISL_419928	21575	C	T	21571	29899	S	L5F	SNP	Spike
EPI_ISL_419928	25572	C	T	25568	29899	ORF3a	S60S	SNP_silent	ORF3a protein
EPI_ISL_419928	26144	G	T	26140	29899	ORF3a	G251V	SNP	ORF3a protein
EPI_ISL_420129	66	C	T	12	29782	5'UTR	66	extragenic	NA
EPI_ISL_420129	241	C	T	187	29782	5'UTR	241	extragenic	NA
EPI_ISL_420129	2997	C	T	2943	29782	NSP3	S93F	SNP	Predicted phosphoesterase, papain-like proteinase
EPI_ISL_420129	3037	C	T	2983	29782	NSP3	F106F	SNP_silent	Predicted phosphoesterase, papain-like proteinase
EPI_ISL_420129	14408	C	T	14354	29782	NSP12b	P314L	SNP	RNA-dependent RNA polymerase, post-ribosomal frameshift
EPI_ISL_420129	23403	A	G	23349	29782	S	D614G	SNP	Spike
EPI_ISL_420129	28881	GGG	AAC	28827	29782	N	RG203KR	SNP	Nucleocapsid protein
EPI_ISL_424629	66	C	T	66	29903	5'UTR	66	extragenic	NA
EPI_ISL_424629	241	C	T	241	29903	5'UTR	241	extragenic	NA
EPI_ISL_424629	3037	C	T	3037	29903	NSP3	F106F	SNP_silent	Predicted phosphoesterase, papain-like proteinase
EPI_ISL_424629	7851	C	T	7851	29903	NSP3	A1711V	SNP	Predicted phosphoesterase, papain-like proteinase
EPI_ISL_424629	14408	C	T	14408	29903	NSP12b	P314L	SNP	RNA-dependent RNA polymerase, post-ribosomal frameshift
EPI_ISL_424629	23403	A	G	23403	29903	S	D614G	SNP	Spike
EPI_ISL_424629	28881	GGG	AAC	28881	29903	N	RG203KR	SNP	Nucleocapsid protein
EPI_ISL_413015	69	A	.	56	29879	5'UTR	69	extragenic	NA
EPI_ISL_413015	686	AAGTCATTT	.	672	29879	NSP1	K141	deletion	Leader protein
EPI_ISL_413015	5084	A	G	5062	29879	NSP3	I789V	SNP	Predicted phosphoesterase, papain-like proteinase
EPI_ISL_413015	26261	C	T	26239	29879	E	S6L	SNP	Envelope
EPI_ISL_413015	28854	C	T	28832	29879	N	S194L	SNP	Nucleocapsid protein
EPI_ISL_420491	73	A	T	73	29903	5'UTR	73	extragenic	NA
EPI_ISL_420491	241	C	T	241	29903	5'UTR	241	extragenic	NA
EPI_ISL_420491	3037	C	T	3037	29903	NSP3	F106F	SNP_silent	Predicted phosphoesterase, papain-like proteinase
EPI_ISL_420491	14408	C	T	14408	29903	NSP12b	P314L	SNP	RNA-dependent RNA polymerase, post-ribosomal frameshift
EPI_ISL_420491	15324	C	T	15324	29903	NSP12b	N619N	SNP_silent	RNA-dependent RNA polymerase, post-ribosomal frameshift
EPI_ISL_420491	23403	A	G	23403	29903	S	D614G	SNP	Spike
EPI_ISL_416653	74	A	C	66	29895	5'UTR	74	extragenic	NA
EPI_ISL_416653	241	C	T	233	29895	5'UTR	241	extragenic	NA
EPI_ISL_416653	1059	C	T	1051	29895	NSP2	T85I	SNP	Non-Structural protein 2
EPI_ISL_416653	3037	C	T	3029	29895	NSP3	F106F	SNP_silent	Predicted phosphoesterase, papain-like proteinase
EPI_ISL_416653	14408	C	T	14400	29895	NSP12b	P314L	SNP	RNA-dependent RNA polymerase, post-ribosomal frameshift
EPI_ISL_416653	23403	A	G	23395	29895	S	D614G	SNP	Spike
EPI_ISL_416653	25563	G	T	25555	29895	ORF3a	Q57H	SNP	ORF3a protein
EPI_ISL_416653	29553	G	A	29545	29895	3'UTR	29553	extragenic	NA
EPI_ISL_426125	76	TT	AC	65	29888	5'UTR	76	extragenic	NA
EPI_ISL_426125	84	C	G	73	29888	5'UTR	84	extragenic	NA
EPI_ISL_426125	241	C	T	230	29888	5'UTR	241	extragenic	NA
EPI_ISL_426125	1059	C	T	1048	29888	NSP2	T85I	SNP	Non-Structural protein 2
EPI_ISL_426125	3037	C	T	3026	29888	NSP3	F106F	SNP_silent	Predicted phosphoesterase, papain-like proteinase
EPI_ISL_426125	3410	G	A	3399	29888	NSP3	A231T	SNP	Predicted phosphoesterase, papain-like proteinase
EPI_ISL_426125	14408	C	T	14397	29888	NSP12b	P314L	SNP	RNA-dependent RNA polymerase, post-ribosomal frameshift
EPI_ISL_426125	23403	A	G	23392	29888	S	D614G	SNP	Spike
EPI_ISL_426125	25563	G	T	25552	29888	ORF3a	Q57H	SNP	ORF3a protein
EPI_ISL_426125	29553	G	A	29542	29888	3'UTR	29553	extragenic	NA
EPI_ISL_417920	77	T	A	77	29903	5'UTR	77	extragenic	NA
EPI_ISL_417920	84	C	A	84	29903	5'UTR	84	extragenic	NA
EPI_ISL_417920	6312	C	A	6312	29903	NSP3	T1198K	SNP	Predicted phosphoesterase, papain-like proteinase
EPI_ISL_417920	11083	G	T	11083	29903	NSP6	L37F	SNP	Transmembrane protein
EPI_ISL_417920	13399	T	C	13399	29903	NSP10	G125G	SNP_silent	Growth-factor-like protein
EPI_ISL_417920	13730	C	T	13730	29903	NSP12b	A88V	SNP	RNA-dependent RNA polymerase, post-ribosomal frameshift
EPI_ISL_417920	19524	C	T	19524	29903	NSP14	L495L	SNP_silent	3'-to-5' exonuclease
EPI_ISL_417920	20463	A	.	20462	29903	NSP15	T281	deletion_frameshift	endoRNAse
EPI_ISL_417920	20466	T	.	20464	29903	NSP15	D282	deletion_frameshift	endoRNAse
EPI_ISL_417920	20467	G	A	20465	29903	NSP15	A283T	SNP	endoRNAse
EPI_ISL_417920	20469	G	A	20467	29903	NSP15	A283A	SNP_silent	endoRNAse
EPI_ISL_417920	20472	A	C	20470	29903	NSP15	Q284H	SNP	endoRNAse
EPI_ISL_417920	20476	GG	CT	20474	29903	NSP15	G286L	SNP	endoRNAse
EPI_ISL_417920	20478	.	AG	20477	29903	NSP15	G286	insertion_frameshift	endoRNAse
EPI_ISL_417920	20479	T	A	20479	29903	NSP15	S287T	SNP	endoRNAse
EPI_ISL_417920	22437	C	T	22437	29903	S	A292V	SNP	Spike
EPI_ISL_417920	22439	C	.	22438	29903	S	A292	deletion_frameshift	Spike
EPI_ISL_417920	22440	T	A	22439	29903	S	L293H	SNP	Spike
EPI_ISL_417920	22443	.	T	22443	29903	S	D294	insertion_frameshift	Spike
EPI_ISL_417920	22446	C	A	22446	29903	S	P295H	SNP	Spike
EPI_ISL_417920	22448	C	T	22448	29903	S	L296F	SNP	Spike
EPI_ISL_417920	22450	C	T	22450	29903	S	L296L	SNP_silent	Spike
EPI_ISL_417920	22452	CA	GG	22452	29903	S	S297W	SNP	Spike
EPI_ISL_417920	23034	C	T	23034	29903	S	P491L	SNP	Spike
EPI_ISL_417920	23119	T	A	23119	29903	S	H519Q	SNP	Spike
EPI_ISL_417920	23929	C	T	23929	29903	S	Y789Y	SNP_silent	Spike
EPI_ISL_417920	26912	C	T	26912	29903	M	T130T	SNP_silent	Membrane
EPI_ISL_417920	26918	GC	CA	26918	29903	M	L133I	SNP	Membrane
EPI_ISL_417920	26921	T	G	26921	29903	M	L133L	SNP_silent	Membrane
EPI_ISL_417920	28311	C	T	28311	29903	N	P13L	SNP	Nucleocapsid protein
EPI_ISL_417920	29861	GG	AA	29861	29903	3'UTR	29861	extragenic	NA
EPI_ISL_417920	29864	G	A	29864	29903	3'UTR	29864	extragenic	NA
EPI_ISL_417920	29867	TG	AA	29867	29903	3'UTR	29867	extragenic	NA
EPI_ISL_417920	29870	C	A	29870	29903	3'UTR	29870	extragenic	NA
EPI_ISL_426161	78	T	G	78	29903	5'UTR	78	extragenic	NA
EPI_ISL_426161	241	C	T	241	29903	5'UTR	241	extragenic	NA
EPI_ISL_426161	739	A	G	739	29903	NSP1	Q158Q	SNP_silent	Leader protein
EPI_ISL_426161	1059	C	T	1059	29903	NSP2	T85I	SNP	Non-Structural protein 2
EPI_ISL_426161	2933	C	T	2933	29903	NSP3	L72F	SNP	Predicted phosphoesterase, papain-like proteinase
EPI_ISL_426161	3037	C	T	3037	29903	NSP3	F106F	SNP_silent	Predicted phosphoesterase, papain-like proteinase
EPI_ISL_426161	9866	C	T	9866	29903	NSP4	L438F	SNP	Transmembrane protein
EPI_ISL_426161	12400	C	T	12400	29903	NSP8	L103L	SNP_silent	Non-Structural Protein 8
EPI_ISL_426161	14408	C	T	14408	29903	NSP12b	P314L	SNP	RNA-dependent RNA polymerase, post-ribosomal frameshift
EPI_ISL_426161	14747	A	G	14747	29903	NSP12b	E427G	SNP	RNA-dependent RNA polymerase, post-ribosomal frameshift
EPI_ISL_426161	20755	A	C	20755	29903	NSP16	S33R	SNP	2'-O-ribose methyltransferase
EPI_ISL_426161	21536	AT	TA	21536	29903	NSP16	D293V	SNP	2'-O-ribose methyltransferase
EPI_ISL_426161	21539	T	A	21539	29903	NSP16	V294D	SNP	2'-O-ribose methyltransferase
EPI_ISL_426161	21550	AA	CT	21550	29903	NSP16	N298L	SNP	2'-O-ribose methyltransferase
EPI_ISL_426161	23403	A	G	23403	29903	S	D614G	SNP	Spike
EPI_ISL_426161	25366	CAA	TCG	25366	29903	S	K1269R	SNP	Spike
EPI_ISL_426161	25373	C	G	25373	29903	S	H1271D	SNP	Spike
EPI_ISL_426161	25377	A	T	25377	29903	S	Y1272F	SNP	Spike
EPI_ISL_426161	25379	A	T	25379	29903	S	T1273S	SNP	Spike
EPI_ISL_426161	25563	G	T	25563	29903	ORF3a	Q57H	SNP	ORF3a protein
EPI_ISL_426161	26447	C	T	26447	29903	E	S68F	SNP	Envelope
EPI_ISL_426161	26449	A	C	26449	29903	E	S68S	SNP_silent	Envelope
EPI_ISL_426161	26452	GT	TC	26452	29903	E	V70S	SNP	Envelope
EPI_ISL_426161	26455	CCT	GTA	26455	29903	E	P71V	SNP	Envelope
EPI_ISL_426161	26462	T	A	26462	29903	E	L73H	SNP	Envelope
EPI_ISL_426161	26464	C	G	26464	29903	E	L74V	SNP	Envelope
EPI_ISL_426161	26466	GG	TC	26466	29903	E	V75L	SNP	Envelope
EPI_ISL_426161	27364	GAGC	TTCG	27364	29903	ORF6	EQ55FE	SNP	ORF6 protein
EPI_ISL_426161	27369	A	T	27369	29903	ORF6	Q56H	SNP	ORF6 protein
EPI_ISL_426161	27371	CAA	TCT	27371	29903	ORF6	PM57LL	SNP	ORF6 protein
EPI_ISL_426161	27376	G	T	27376	29903	ORF6	E59*	SNP_stop	ORF6 protein
EPI_ISL_426161	27383	A	T	27383	29903	ORF6	D61V	SNP	ORF6 protein
EPI_ISL_426161	28238	TGT	ATC	28238	29903	ORF8	V116S	SNP	ORF8 protein
EPI_ISL_426161	28242	G	C	28242	29903	ORF8	V117L	SNP	ORF8 protein
EPI_ISL_426161	28245	T	G	28245	29903	ORF8	L118V	SNP	ORF8 protein
EPI_ISL_418876	79	A	G	75	29911	5'UTR	79	extragenic	NA
EPI_ISL_418876	241	C	T	237	29911	5'UTR	241	extragenic	NA
EPI_ISL_418876	1059	C	T	1055	29911	NSP2	T85I	SNP	Non-Structural protein 2
EPI_ISL_418876	3037	C	T	3033	29911	NSP3	F106F	SNP_silent	Predicted phosphoesterase, papain-like proteinase
EPI_ISL_418876	14408	C	T	14404	29911	NSP12b	P314L	SNP	RNA-dependent RNA polymerase, post-ribosomal frameshift
EPI_ISL_418876	23403	A	G	23399	29911	S	D614G	SNP	Spike
EPI_ISL_418876	25563	G	T	25559	29911	ORF3a	Q57H	SNP	ORF3a protein
EPI_ISL_418876	29553	G	A	29549	29911	3'UTR	29553	extragenic	NA
EPI_ISL_420074	80	A	G	80	29903	5'UTR	80	extragenic	NA
EPI_ISL_420074	241	C	T	241	29903	5'UTR	241	extragenic	NA
EPI_ISL_420074	3037	C	T	3037	29903	NSP3	F106F	SNP_silent	Predicted phosphoesterase, papain-like proteinase
EPI_ISL_420074	14408	C	T	14408	29903	NSP12b	P314L	SNP	RNA-dependent RNA polymerase, post-ribosomal frameshift
EPI_ISL_420074	23403	A	G	23403	29903	S	D614G	SNP	Spike
EPI_ISL_420074	28116	G	A	28116	29903	ORF8	D75N	SNP	ORF8 protein
EPI_ISL_426097	82	.	C	42	29875	5'UTR	82	extragenic	NA
EPI_ISL_426097	85	T	.	44	29875	5'UTR	85	extragenic	NA
EPI_ISL_426097	90	G	.	48	29875	5'UTR	90	extragenic	NA
EPI_ISL_426097	91	G	C	49	29875	5'UTR	91	extragenic	NA
EPI_ISL_426097	150	T	C	108	29875	5'UTR	150	extragenic	NA
EPI_ISL_426097	153	T	G	111	29875	5'UTR	153	extragenic	NA
EPI_ISL_426097	241	C	T	199	29875	5'UTR	241	extragenic	NA
EPI_ISL_426097	379	C	A	337	29875	NSP1	V38V	SNP_silent	Leader protein
EPI_ISL_426097	1059	C	T	1017	29875	NSP2	T85I	SNP	Non-Structural protein 2
EPI_ISL_426097	2244	T	C	2202	29875	NSP2	V480A	SNP	Non-Structural protein 2
EPI_ISL_426097	3037	C	T	2995	29875	NSP3	F106F	SNP_silent	Predicted phosphoesterase, papain-like proteinase
EPI_ISL_426097	10761	A	G	10719	29875	NSP5	K236R	SNP	3C-like proteinase
EPI_ISL_426097	14408	C	T	14366	29875	NSP12b	P314L	SNP	RNA-dependent RNA polymerase, post-ribosomal frameshift
EPI_ISL_426097	23403	A	G	23361	29875	S	D614G	SNP	Spike
EPI_ISL_426097	25563	G	T	25521	29875	ORF3a	Q57H	SNP	ORF3a protein
EPI_ISL_426097	29867	TG	AA	29825	29875	3'UTR	29867	extragenic	NA
EPI_ISL_426097	29870	C	A	29828	29875	3'UTR	29870	extragenic	NA
EPI_ISL_418878	84	CT	TC	64	29843	5'UTR	84	extragenic	NA
EPI_ISL_418878	90	G	.	69	29843	5'UTR	90	extragenic	NA
EPI_ISL_418878	91	G	C	70	29843	5'UTR	91	extragenic	NA
EPI_ISL_418878	241	C	T	220	29843	5'UTR	241	extragenic	NA
EPI_ISL_418878	1059	C	T	1038	29843	NSP2	T85I	SNP	Non-Structural protein 2
EPI_ISL_418878	3037	C	T	3016	29843	NSP3	F106F	SNP_silent	Predicted phosphoesterase, papain-like proteinase
EPI_ISL_418878	14408	C	T	14387	29843	NSP12b	P314L	SNP	RNA-dependent RNA polymerase, post-ribosomal frameshift
EPI_ISL_418878	16912	G	T	16891	29843	NSP13	V226L	SNP	Helicase
EPI_ISL_418878	23403	A	G	23382	29843	S	D614G	SNP	Spike
EPI_ISL_418878	25563	G	T	25542	29843	ORF3a	Q57H	SNP	ORF3a protein
EPI_ISL_418878	29553	G	A	29532	29843	3'UTR	29553	extragenic	NA
EPI_ISL_424186	91	G	C	4	29814	5'UTR	91	extragenic	NA
EPI_ISL_424186	241	C	T	154	29814	5'UTR	241	extragenic	NA
EPI_ISL_424186	1059	C	T	972	29814	NSP2	T85I	SNP	Non-Structural protein 2
EPI_ISL_424186	3037	C	T	2950	29814	NSP3	F106F	SNP_silent	Predicted phosphoesterase, papain-like proteinase
EPI_ISL_424186	4975	G	T	4888	29814	NSP3	V752V	SNP_silent	Predicted phosphoesterase, papain-like proteinase
EPI_ISL_424186	14408	C	T	14321	29814	NSP12b	P314L	SNP	RNA-dependent RNA polymerase, post-ribosomal frameshift
EPI_ISL_424186	20823	C	T	20736	29814	NSP16	N55N	SNP_silent	2'-O-ribose methyltransferase
EPI_ISL_424186	23403	A	G	23316	29814	S	D614G	SNP	Spike
EPI_ISL_424186	25523	G	T	25436	29814	ORF3a	G44V	SNP	ORF3a protein
EPI_ISL_424186	25563	G	T	25476	29814	ORF3a	Q57H	SNP	ORF3a protein
EPI_ISL_424186	27869	T	C	27782	29814	ORF7b	N38N	SNP_silent	ORF7b protein
EPI_ISL_422438	98	C	T	81	29767	5'UTR	98	extragenic	NA
EPI_ISL_422438	241	C	T	224	29767	5'UTR	241	extragenic	NA
EPI_ISL_422438	3037	C	T	3020	29767	NSP3	F106F	SNP_silent	Predicted phosphoesterase, papain-like proteinase
EPI_ISL_422438	14408	C	T	14391	29767	NSP12b	P314L	SNP	RNA-dependent RNA polymerase, post-ribosomal frameshift
EPI_ISL_422438	23403	A	G	23386	29767	S	D614G	SNP	Spike
EPI_ISL_417413	100	C	A	100	29903	5'UTR	100	extragenic	NA
EPI_ISL_417413	580	T	A	580	29903	NSP1	G105G	SNP_silent	Leader protein
EPI_ISL_417413	779	G	C	779	29903	NSP1	E172Q	SNP	Leader protein
EPI_ISL_417413	946	T	A	946	29903	NSP2	G47G	SNP_silent	Non-Structural protein 2
EPI_ISL_417413	1100	TC	GT	1100	29903	NSP2	S99V	SNP	Non-Structural protein 2
EPI_ISL_417413	1106	A	T	1106	29903	NSP2	I101F	SNP	Non-Structural protein 2
EPI_ISL_417413	1119	A	C	1119	29903	NSP2	Q105P	SNP	Non-Structural protein 2
EPI_ISL_417413	1134	A	T	1134	29903	NSP2	K110M	SNP	Non-Structural protein 2
EPI_ISL_417413	1156	G	A	1156	29903	NSP2	M117I	SNP	Non-Structural protein 2
EPI_ISL_417413	1210	G	A	1210	29903	NSP2	M135I	SNP	Non-Structural protein 2
EPI_ISL_417413	1225	C	A	1225	29903	NSP2	L140L	SNP_silent	Non-Structural protein 2
EPI_ISL_417413	1359	T	C	1359	29903	NSP2	V185A	SNP	Non-Structural protein 2
EPI_ISL_417413	1397	G	A	1397	29903	NSP2	V198I	SNP	Non-Structural protein 2
EPI_ISL_417413	1420	C	T	1420	29903	NSP2	A205A	SNP_silent	Non-Structural protein 2
EPI_ISL_417413	1470	G	A	1470	29903	NSP2	R222H	SNP	Non-Structural protein 2
EPI_ISL_417413	1473	C	T	1473	29903	NSP2	T223I	SNP	Non-Structural protein 2
EPI_ISL_417413	1475	A	C	1475	29903	NSP2	I224L	SNP	Non-Structural protein 2
EPI_ISL_417413	2250	G	A	2250	29903	NSP2	G482E	SNP	Non-Structural protein 2
EPI_ISL_417413	2455	C	T	2455	29903	NSP2	L550L	SNP_silent	Non-Structural protein 2
EPI_ISL_417413	2475	A	T	2475	29903	NSP2	K557I	SNP	Non-Structural protein 2
EPI_ISL_417413	2549	G	C	2549	29903	NSP2	D582H	SNP	Non-Structural protein 2
EPI_ISL_417413	2586	T	A	2586	29903	NSP2	V594D	SNP	Non-Structural protein 2
EPI_ISL_417413	2591	G	A	2591	29903	NSP2	A596T	SNP	Non-Structural protein 2
EPI_ISL_417413	2612	G	C	2612	29903	NSP2	V603L	SNP	Non-Structural protein 2
EPI_ISL_417413	2715	G	T	2715	29903	NSP2	G637V	SNP	Non-Structural protein 2
EPI_ISL_417413	2932	A	G	2932	29903	NSP3	L71L	SNP_silent	Predicted phosphoesterase, papain-like proteinase
EPI_ISL_417413	3117	C	T	3117	29903	NSP3	T133I	SNP	Predicted phosphoesterase, papain-like proteinase
EPI_ISL_417413	3146	G	C	3146	29903	NSP3	E143Q	SNP	Predicted phosphoesterase, papain-like proteinase
EPI_ISL_417413	3787	C	T	3787	29903	NSP3	Y356Y	SNP_silent	Predicted phosphoesterase, papain-like proteinase
EPI_ISL_417413	4084	C	T	4084	29903	NSP3	D455D	SNP_silent	Predicted phosphoesterase, papain-like proteinase
EPI_ISL_417413	7392	C	T	7392	29903	NSP3	P1558L	SNP	Predicted phosphoesterase, papain-like proteinase
EPI_ISL_417413	10532	T	A	10532	29903	NSP5	C160S	SNP	3C-like proteinase
EPI_ISL_417413	11232	C	T	11232	29903	NSP6	P87L	SNP	Transmembrane protein
EPI_ISL_417413	11234	G	A	11234	29903	NSP6	A88T	SNP	Transmembrane protein
EPI_ISL_417413	13476	C	T	13476	29903	NSP12b	C3C	SNP_silent	RNA-dependent RNA polymerase, post-ribosomal frameshift
EPI_ISL_417413	13492	C	T	13492	29903	NSP12b	R9C	SNP	RNA-dependent RNA polymerase, post-ribosomal frameshift
EPI_ISL_417413	14286	C	T	14286	29903	NSP12b	L273L	SNP_silent	RNA-dependent RNA polymerase, post-ribosomal frameshift
EPI_ISL_417413	14310	G	A	14310	29903	NSP12b	W281*	SNP_stop	RNA-dependent RNA polymerase, post-ribosomal frameshift
EPI_ISL_417413	14394	T	A	14394	29903	NSP12b	S309S	SNP_silent	RNA-dependent RNA polymerase, post-ribosomal frameshift
EPI_ISL_417413	14407	C	A	14407	29903	NSP12b	P314T	SNP	RNA-dependent RNA polymerase, post-ribosomal frameshift
EPI_ISL_417413	14430	G	A	14430	29903	NSP12b	V321V	SNP_silent	RNA-dependent RNA polymerase, post-ribosomal frameshift
EPI_ISL_417413	14443	G	T	14443	29903	NSP12b	V326F	SNP	RNA-dependent RNA polymerase, post-ribosomal frameshift
EPI_ISL_417413	14682	T	G	14682	29903	NSP12b	N405K	SNP	RNA-dependent RNA polymerase, post-ribosomal frameshift
EPI_ISL_417413	14710	G	A	14710	29903	NSP12b	V415M	SNP	RNA-dependent RNA polymerase, post-ribosomal frameshift
EPI_ISL_417413	14740	T	C	14740	29903	NSP12b	S425P	SNP	RNA-dependent RNA polymerase, post-ribosomal frameshift
EPI_ISL_417413	14763	C	A	14763	29903	NSP12b	F432L	SNP	RNA-dependent RNA polymerase, post-ribosomal frameshift
EPI_ISL_417413	14773	G	T	14773	29903	NSP12b	D436Y	SNP	RNA-dependent RNA polymerase, post-ribosomal frameshift
EPI_ISL_417413	14808	T	A	14808	29903	NSP12b	Y447*	SNP_stop	RNA-dependent RNA polymerase, post-ribosomal frameshift
EPI_ISL_417413	15101	C	A	15101	29903	NSP12b	A545D	SNP	RNA-dependent RNA polymerase, post-ribosomal frameshift
EPI_ISL_417413	15119	T	A	15119	29903	NSP12b	V551D	SNP	RNA-dependent RNA polymerase, post-ribosomal frameshift
EPI_ISL_417413	15958	G	A	15958	29903	NSP12b	A831T	SNP	RNA-dependent RNA polymerase, post-ribosomal frameshift
EPI_ISL_417413	19763	C	A	19763	29903	NSP15	T48K	SNP	endoRNAse
EPI_ISL_417413	26396	T	A	26396	29903	E	L51H	SNP	Envelope
EPI_ISL_417413	26551	T	C	26551	29903	M	V10A	SNP	Membrane
EPI_ISL_417413	26753	C	T	26753	29903	M	T77T	SNP_silent	Membrane
EPI_ISL_417413	27103	C	T	27103	29903	M	A194V	SNP	Membrane
EPI_ISL_417413	28109	G	T	28109	29903	ORF8	Q72H	SNP	ORF8 protein
EPI_ISL_417413	28688	T	C	28688	29903	N	A138A	SNP_silent	Nucleocapsid protein
EPI_ISL_417413	29742	G	T	29742	29903	3'UTR	29742	extragenic	NA
EPI_ISL_416524	101	G	A	117	29875	5'UTR	101	extragenic	NA
EPI_ISL_416524	241	C	T	257	29875	5'UTR	241	extragenic	NA
EPI_ISL_416524	3037	C	T	3053	29875	NSP3	F106F	SNP_silent	Predicted phosphoesterase, papain-like proteinase
EPI_ISL_416524	14408	C	T	14424	29875	NSP12b	P314L	SNP	RNA-dependent RNA polymerase, post-ribosomal frameshift
EPI_ISL_416524	23403	A	G	23419	29875	S	D614G	SNP	Spike
EPI_ISL_416652	101	G	A	27	29829	5'UTR	101	extragenic	NA
EPI_ISL_416652	6696	C	T	6622	29829	NSP3	P1326L	SNP	Predicted phosphoesterase, papain-like proteinase
EPI_ISL_416652	8782	C	T	8708	29829	NSP4	S76S	SNP_silent	Transmembrane protein
EPI_ISL_416652	17747	C	T	17673	29829	NSP13	P504L	SNP	Helicase
EPI_ISL_416652	17858	A	G	17784	29829	NSP13	Y541C	SNP	Helicase
EPI_ISL_416652	18060	C	T	17986	29829	NSP14	L7L	SNP_silent	3'-to-5' exonuclease
EPI_ISL_416652	28144	T	C	28070	29829	ORF8	L84S	SNP	ORF8 protein
EPI_ISL_416652	29416	C	T	29342	29829	N	A381A	SNP_silent	Nucleocapsid protein
EPI_ISL_426812	101	G	A	101	29903	5'UTR	101	extragenic	NA
EPI_ISL_426812	241	C	T	241	29903	5'UTR	241	extragenic	NA
EPI_ISL_426812	1059	C	T	1059	29903	NSP2	T85I	SNP	Non-Structural protein 2
EPI_ISL_426812	3037	C	T	3037	29903	NSP3	F106F	SNP_silent	Predicted phosphoesterase, papain-like proteinase
EPI_ISL_426812	3564	G	T	3564	29903	NSP3	G282V	SNP	Predicted phosphoesterase, papain-like proteinase
EPI_ISL_426812	6504	C	T	6504	29903	NSP3	A1262V	SNP	Predicted phosphoesterase, papain-like proteinase
EPI_ISL_426812	11916	C	T	11916	29903	NSP7	S25L	SNP	Non-Structural Protein 7
EPI_ISL_426812	14408	C	T	14408	29903	NSP12b	P314L	SNP	RNA-dependent RNA polymerase, post-ribosomal frameshift
EPI_ISL_426812	23403	A	G	23403	29903	S	D614G	SNP	Spike
EPI_ISL_426812	25563	G	T	25563	29903	ORF3a	Q57H	SNP	ORF3a protein
EPI_ISL_417556	102	G	A	102	29903	5'UTR	102	extragenic	NA
EPI_ISL_417556	241	C	T	241	29903	5'UTR	241	extragenic	NA
EPI_ISL_417556	3037	C	T	3037	29903	NSP3	F106F	SNP_silent	Predicted phosphoesterase, papain-like proteinase
EPI_ISL_417556	3793	T	C	3793	29903	NSP3	A358A	SNP_silent	Predicted phosphoesterase, papain-like proteinase
EPI_ISL_417556	14408	C	T	14408	29903	NSP12b	P314L	SNP	RNA-dependent RNA polymerase, post-ribosomal frameshift
EPI_ISL_417556	16311	A	G	16311	29903	NSP13	L25L	SNP_silent	Helicase
EPI_ISL_417556	23403	A	G	23403	29903	S	D614G	SNP	Spike
EPI_ISL_417556	23575	C	T	23575	29903	S	C671C	SNP_silent	Spike
EPI_ISL_417556	28519	C	T	28519	29903	N	D82D	SNP_silent	Nucleocapsid protein
EPI_ISL_417556	29513	G	T	29513	29903	N	A414S	SNP	Nucleocapsid protein
EPI_ISL_403931	104	T	A	104	29889	5'UTR	104	extragenic	NA
EPI_ISL_403931	111	TT	CG	111	29889	5'UTR	111	extragenic	NA
EPI_ISL_403931	119	CT	GC	119	29889	5'UTR	119	extragenic	NA
EPI_ISL_403931	124	G	A	124	29889	5'UTR	124	extragenic	NA
EPI_ISL_414635	105	G	T	105	29903	5'UTR	105	extragenic	NA
EPI_ISL_414635	241	C	T	241	29903	5'UTR	241	extragenic	NA
EPI_ISL_414635	1059	C	T	1059	29903	NSP2	T85I	SNP	Non-Structural protein 2
EPI_ISL_414635	3037	C	T	3037	29903	NSP3	F106F	SNP_silent	Predicted phosphoesterase, papain-like proteinase
EPI_ISL_414635	14408	C	T	14408	29903	NSP12b	P314L	SNP	RNA-dependent RNA polymerase, post-ribosomal frameshift
EPI_ISL_414635	20766	A	G	20766	29903	NSP16	L36L	SNP_silent	2'-O-ribose methyltransferase
EPI_ISL_414635	23403	A	G	23403	29903	S	D614G	SNP	Spike
EPI_ISL_414635	25563	G	T	25563	29903	ORF3a	Q57H	SNP	ORF3a protein
EPI_ISL_418239	105	G	T	105	29864	5'UTR	105	extragenic	NA
EPI_ISL_418239	241	C	T	241	29864	5'UTR	241	extragenic	NA
EPI_ISL_418239	1059	C	T	1059	29864	NSP2	T85I	SNP	Non-Structural protein 2
EPI_ISL_418239	3037	C	T	3037	29864	NSP3	F106F	SNP_silent	Predicted phosphoesterase, papain-like proteinase
EPI_ISL_418239	14408	C	T	14408	29864	NSP12b	P314L	SNP	RNA-dependent RNA polymerase, post-ribosomal frameshift
EPI_ISL_418239	15213	A	G	15213	29864	NSP12b	T582T	SNP_silent	RNA-dependent RNA polymerase, post-ribosomal frameshift
EPI_ISL_418239	20766	A	G	20766	29864	NSP16	L36L	SNP_silent	2'-O-ribose methyltransferase
EPI_ISL_418239	23403	A	G	23403	29864	S	D614G	SNP	Spike
EPI_ISL_418239	25563	G	T	25563	29864	ORF3a	Q57H	SNP	ORF3a protein
EPI_ISL_418239	26199	G	T	26199	29864	ORF3a	T269T	SNP_silent	ORF3a protein
EPI_ISL_420644	105	G	T	105	29903	5'UTR	105	extragenic	NA
EPI_ISL_420644	241	C	T	241	29903	5'UTR	241	extragenic	NA
EPI_ISL_420644	3037	C	T	3037	29903	NSP3	F106F	SNP_silent	Predicted phosphoesterase, papain-like proteinase
EPI_ISL_420644	14408	C	T	14408	29903	NSP12b	P314L	SNP	RNA-dependent RNA polymerase, post-ribosomal frameshift
EPI_ISL_420644	23403	A	G	23403	29903	S	D614G	SNP	Spike
EPI_ISL_420644	28720	C	T	28720	29903	N	R149R	SNP_silent	Nucleocapsid protein
EPI_ISL_420645	105	G	T	105	29903	5'UTR	105	extragenic	NA
EPI_ISL_420645	241	C	T	241	29903	5'UTR	241	extragenic	NA
EPI_ISL_420645	3037	C	T	3037	29903	NSP3	F106F	SNP_silent	Predicted phosphoesterase, papain-like proteinase
EPI_ISL_420645	14408	C	T	14408	29903	NSP12b	P314L	SNP	RNA-dependent RNA polymerase, post-ribosomal frameshift
EPI_ISL_420645	23403	A	G	23403	29903	S	D614G	SNP	Spike
EPI_ISL_420645	28720	C	T	28720	29903	N	R149R	SNP_silent	Nucleocapsid protein
EPI_ISL_420646	105	G	T	105	29903	5'UTR	105	extragenic	NA
EPI_ISL_420646	241	C	T	241	29903	5'UTR	241	extragenic	NA
EPI_ISL_420646	3037	C	T	3037	29903	NSP3	F106F	SNP_silent	Predicted phosphoesterase, papain-like proteinase
EPI_ISL_420646	14408	C	T	14408	29903	NSP12b	P314L	SNP	RNA-dependent RNA polymerase, post-ribosomal frameshift
EPI_ISL_420646	23403	A	G	23403	29903	S	D614G	SNP	Spike
EPI_ISL_420646	28720	C	T	28720	29903	N	R149R	SNP_silent	Nucleocapsid protein
EPI_ISL_420647	105	G	T	105	29903	5'UTR	105	extragenic	NA
EPI_ISL_420647	241	C	T	241	29903	5'UTR	241	extragenic	NA
EPI_ISL_420647	3037	C	T	3037	29903	NSP3	F106F	SNP_silent	Predicted phosphoesterase, papain-like proteinase
EPI_ISL_420647	14408	C	T	14408	29903	NSP12b	P314L	SNP	RNA-dependent RNA polymerase, post-ribosomal frameshift
EPI_ISL_420647	23403	A	G	23403	29903	S	D614G	SNP	Spike
EPI_ISL_420647	28720	C	T	28720	29903	N	R149R	SNP_silent	Nucleocapsid protein
EPI_ISL_420648	105	G	T	105	29903	5'UTR	105	extragenic	NA
EPI_ISL_420648	241	C	T	241	29903	5'UTR	241	extragenic	NA
EPI_ISL_420648	3037	C	T	3037	29903	NSP3	F106F	SNP_silent	Predicted phosphoesterase, papain-like proteinase
EPI_ISL_420648	14408	C	T	14408	29903	NSP12b	P314L	SNP	RNA-dependent RNA polymerase, post-ribosomal frameshift
EPI_ISL_420648	23403	A	G	23403	29903	S	D614G	SNP	Spike
EPI_ISL_420648	28720	C	T	28720	29903	N	R149R	SNP_silent	Nucleocapsid protein
EPI_ISL_420753	105	G	T	105	29903	5'UTR	105	extragenic	NA
EPI_ISL_420753	241	C	T	241	29903	5'UTR	241	extragenic	NA
EPI_ISL_420753	3037	C	T	3037	29903	NSP3	F106F	SNP_silent	Predicted phosphoesterase, papain-like proteinase
EPI_ISL_420753	9165	C	T	9165	29903	NSP4	T204I	SNP	Transmembrane protein
EPI_ISL_420753	14408	C	T	14408	29903	NSP12b	P314L	SNP	RNA-dependent RNA polymerase, post-ribosomal frameshift
EPI_ISL_420753	22345	T	C	22345	29903	S	G261G	SNP_silent	Spike
EPI_ISL_420753	23403	A	G	23403	29903	S	D614G	SNP	Spike
EPI_ISL_420753	28720	C	T	28720	29903	N	R149R	SNP_silent	Nucleocapsid protein
EPI_ISL_420757	105	G	T	105	29903	5'UTR	105	extragenic	NA
EPI_ISL_420757	241	C	T	241	29903	5'UTR	241	extragenic	NA
EPI_ISL_420757	3037	C	T	3037	29903	NSP3	F106F	SNP_silent	Predicted phosphoesterase, papain-like proteinase
EPI_ISL_420757	14408	C	T	14408	29903	NSP12b	P314L	SNP	RNA-dependent RNA polymerase, post-ribosomal frameshift
EPI_ISL_420757	23403	A	G	23403	29903	S	D614G	SNP	Spike
EPI_ISL_420757	28720	C	T	28720	29903	N	R149R	SNP_silent	Nucleocapsid protein
EPI_ISL_420758	105	G	T	105	29903	5'UTR	105	extragenic	NA
EPI_ISL_420758	241	C	T	241	29903	5'UTR	241	extragenic	NA
EPI_ISL_420758	3037	C	T	3037	29903	NSP3	F106F	SNP_silent	Predicted phosphoesterase, papain-like proteinase
EPI_ISL_420758	14408	C	T	14408	29903	NSP12b	P314L	SNP	RNA-dependent RNA polymerase, post-ribosomal frameshift
EPI_ISL_420758	22345	T	C	22345	29903	S	G261G	SNP_silent	Spike
EPI_ISL_420758	23403	A	G	23403	29903	S	D614G	SNP	Spike
EPI_ISL_420758	26803	G	T	26803	29903	M	S94I	SNP	Membrane
EPI_ISL_420758	28720	C	T	28720	29903	N	R149R	SNP_silent	Nucleocapsid protein
EPI_ISL_421205	105	G	A	105	29903	5'UTR	105	extragenic	NA
EPI_ISL_421205	241	C	T	241	29903	5'UTR	241	extragenic	NA
EPI_ISL_421205	2773	C	T	2773	29903	NSP3	Y18Y	SNP_silent	Predicted phosphoesterase, papain-like proteinase
EPI_ISL_421205	3037	C	T	3037	29903	NSP3	F106F	SNP_silent	Predicted phosphoesterase, papain-like proteinase
EPI_ISL_421205	14408	C	T	14408	29903	NSP12b	P314L	SNP	RNA-dependent RNA polymerase, post-ribosomal frameshift
EPI_ISL_421205	17193	G	T	17193	29903	NSP13	E319D	SNP	Helicase
EPI_ISL_421205	18348	C	T	18348	29903	NSP14	T103T	SNP_silent	3'-to-5' exonuclease
EPI_ISL_421205	23403	A	G	23403	29903	S	D614G	SNP	Spike
EPI_ISL_425569	105	G	T	105	29900	5'UTR	105	extragenic	NA
EPI_ISL_425569	431	G	A	431	29900	NSP1	V56I	SNP	Leader protein
EPI_ISL_425569	1605	ATG	.	1604	29900	NSP2	D268	deletion	Non-Structural protein 2
EPI_ISL_425569	11474	A	G	11471	29900	NSP6	I168V	SNP	Transmembrane protein
EPI_ISL_425569	20270	C	T	20267	29900	NSP15	A217V	SNP	endoRNAse
EPI_ISL_425569	29683	A	T	29680	29900	3'UTR	29683	extragenic	NA
EPI_ISL_425569	29751	G	C	29748	29900	3'UTR	29751	extragenic	NA
EPI_ISL_416354	106	C	T	74	29834	5'UTR	106	extragenic	NA
EPI_ISL_416354	1190	C	T	1158	29834	NSP2	P129S	SNP	Non-Structural protein 2
EPI_ISL_416354	11083	G	T	11051	29834	NSP6	L37F	SNP	Transmembrane protein
EPI_ISL_416354	26333	C	T	26301	29834	E	T30I	SNP	Envelope
EPI_ISL_416354	29413	A	G	29381	29834	N	Q380Q	SNP_silent	Nucleocapsid protein
EPI_ISL_425591	106	C	T	106	29903	5'UTR	106	extragenic	NA
EPI_ISL_425591	2480	A	G	2480	29903	NSP2	I559V	SNP	Non-Structural protein 2
EPI_ISL_425591	2558	C	T	2558	29903	NSP2	P585S	SNP	Non-Structural protein 2
EPI_ISL_425591	11083	G	T	11083	29903	NSP6	L37F	SNP	Transmembrane protein
EPI_ISL_425591	14805	C	T	14805	29903	NSP12b	Y446Y	SNP_silent	RNA-dependent RNA polymerase, post-ribosomal frameshift
EPI_ISL_425591	26144	G	T	26144	29903	ORF3a	G251V	SNP	ORF3a protein
EPI_ISL_423276	110	C	T	110	29903	5'UTR	110	extragenic	NA
EPI_ISL_423276	241	C	T	241	29903	5'UTR	241	extragenic	NA
EPI_ISL_423276	2416	C	T	2416	29903	NSP2	Y537Y	SNP_silent	Non-Structural protein 2
EPI_ISL_423276	3037	C	T	3037	29903	NSP3	F106F	SNP_silent	Predicted phosphoesterase, papain-like proteinase
EPI_ISL_423276	14408	C	T	14408	29903	NSP12b	P314L	SNP	RNA-dependent RNA polymerase, post-ribosomal frameshift
EPI_ISL_423276	17069	C	A	17069	29903	NSP13	S278Y	SNP	Helicase
EPI_ISL_423276	18557	C	T	18557	29903	NSP14	T173I	SNP	3'-to-5' exonuclease
EPI_ISL_423276	20578	G	T	20578	29903	NSP15	V320L	SNP	endoRNAse
EPI_ISL_423276	23403	A	G	23403	29903	S	D614G	SNP	Spike
EPI_ISL_423276	25563	G	T	25563	29903	ORF3a	Q57H	SNP	ORF3a protein
EPI_ISL_423385	110	C	T	110	29903	5'UTR	110	extragenic	NA
EPI_ISL_423385	2480	A	G	2480	29903	NSP2	I559V	SNP	Non-Structural protein 2
EPI_ISL_423385	2558	C	T	2558	29903	NSP2	P585S	SNP	Non-Structural protein 2
EPI_ISL_423385	11083	G	T	11083	29903	NSP6	L37F	SNP	Transmembrane protein
EPI_ISL_423385	14805	C	T	14805	29903	NSP12b	Y446Y	SNP_silent	RNA-dependent RNA polymerase, post-ribosomal frameshift
EPI_ISL_423385	16762	C	T	16762	29903	NSP13	L176F	SNP	Helicase
EPI_ISL_423385	26144	G	T	26144	29903	ORF3a	G251V	SNP	ORF3a protein
EPI_ISL_423394	110	C	T	110	29903	5'UTR	110	extragenic	NA
EPI_ISL_423394	241	C	T	241	29903	5'UTR	241	extragenic	NA
EPI_ISL_423394	2416	C	T	2416	29903	NSP2	Y537Y	SNP_silent	Non-Structural protein 2
EPI_ISL_423394	3037	C	T	3037	29903	NSP3	F106F	SNP_silent	Predicted phosphoesterase, papain-like proteinase
EPI_ISL_423394	14408	C	T	14408	29903	NSP12b	P314L	SNP	RNA-dependent RNA polymerase, post-ribosomal frameshift
EPI_ISL_423394	17069	C	A	17069	29903	NSP13	S278Y	SNP	Helicase
EPI_ISL_423394	18557	C	T	18557	29903	NSP14	T173I	SNP	3'-to-5' exonuclease
EPI_ISL_423394	20578	G	T	20578	29903	NSP15	V320L	SNP	endoRNAse
EPI_ISL_423394	23403	A	G	23403	29903	S	D614G	SNP	Spike
EPI_ISL_423394	25563	G	T	25563	29903	ORF3a	Q57H	SNP	ORF3a protein
EPI_ISL_423399	110	C	T	110	29903	5'UTR	110	extragenic	NA
EPI_ISL_423399	241	C	T	241	29903	5'UTR	241	extragenic	NA
EPI_ISL_423399	2416	C	T	2416	29903	NSP2	Y537Y	SNP_silent	Non-Structural protein 2
EPI_ISL_423399	3037	C	T	3037	29903	NSP3	F106F	SNP_silent	Predicted phosphoesterase, papain-like proteinase
EPI_ISL_423399	14408	C	T	14408	29903	NSP12b	P314L	SNP	RNA-dependent RNA polymerase, post-ribosomal frameshift
EPI_ISL_423399	17069	C	A	17069	29903	NSP13	S278Y	SNP	Helicase
EPI_ISL_423399	18557	C	T	18557	29903	NSP14	T173I	SNP	3'-to-5' exonuclease
EPI_ISL_423399	20578	G	T	20578	29903	NSP15	V320L	SNP	endoRNAse
EPI_ISL_423399	23403	A	G	23403	29903	S	D614G	SNP	Spike
EPI_ISL_423399	25563	G	T	25563	29903	ORF3a	Q57H	SNP	ORF3a protein
EPI_ISL_423990	110	C	T	110	29903	5'UTR	110	extragenic	NA
EPI_ISL_423990	2480	A	G	2480	29903	NSP2	I559V	SNP	Non-Structural protein 2
EPI_ISL_423990	2558	C	T	2558	29903	NSP2	P585S	SNP	Non-Structural protein 2
EPI_ISL_423990	11083	G	T	11083	29903	NSP6	L37F	SNP	Transmembrane protein
EPI_ISL_423990	14805	C	T	14805	29903	NSP12b	Y446Y	SNP_silent	RNA-dependent RNA polymerase, post-ribosomal frameshift
EPI_ISL_423990	26144	G	T	26144	29903	ORF3a	G251V	SNP	ORF3a protein
EPI_ISL_423990	28606	C	T	28606	29903	N	Y111Y	SNP_silent	Nucleocapsid protein
EPI_ISL_427326	116	G	A	116	29903	5'UTR	116	extragenic	NA
EPI_ISL_427326	157	C	G	157	29903	5'UTR	157	extragenic	NA
EPI_ISL_427326	210	G	C	210	29903	5'UTR	210	extragenic	NA
EPI_ISL_427326	241	C	T	241	29903	5'UTR	241	extragenic	NA
EPI_ISL_427326	3037	C	T	3037	29903	NSP3	F106F	SNP_silent	Predicted phosphoesterase, papain-like proteinase
EPI_ISL_427326	14408	C	T	14408	29903	NSP12b	P314L	SNP	RNA-dependent RNA polymerase, post-ribosomal frameshift
EPI_ISL_427326	23403	A	G	23403	29903	S	D614G	SNP	Spike
EPI_ISL_427326	26750	C	T	26750	29903	M	I76I	SNP_silent	Membrane
EPI_ISL_427326	28881	GGG	AAC	28881	29903	N	RG203KR	SNP	Nucleocapsid protein
EPI_ISL_427809	117	CA	TG	101	29871	5'UTR	117	extragenic	NA
EPI_ISL_427809	5572	G	T	5556	29871	NSP3	M951I	SNP	Predicted phosphoesterase, papain-like proteinase
EPI_ISL_427809	11083	G	T	11067	29871	NSP6	L37F	SNP	Transmembrane protein
EPI_ISL_427809	14805	C	T	14789	29871	NSP12b	Y446Y	SNP_silent	RNA-dependent RNA polymerase, post-ribosomal frameshift
EPI_ISL_427809	26144	G	T	26128	29871	ORF3a	G251V	SNP	ORF3a protein
EPI_ISL_427809	28311	C	T	28295	29871	N	P13L	SNP	Nucleocapsid protein
EPI_ISL_427809	29871	A	T	29855	29871	3'UTR	29871	extragenic	NA
EPI_ISL_425161	125	C	T	71	29782	5'UTR	125	extragenic	NA
EPI_ISL_425161	241	C	T	187	29782	5'UTR	241	extragenic	NA
EPI_ISL_425161	1059	C	T	1005	29782	NSP2	T85I	SNP	Non-Structural protein 2
EPI_ISL_425161	3037	C	T	2983	29782	NSP3	F106F	SNP_silent	Predicted phosphoesterase, papain-like proteinase
EPI_ISL_425161	14408	C	T	14354	29782	NSP12b	P314L	SNP	RNA-dependent RNA polymerase, post-ribosomal frameshift
EPI_ISL_425161	23403	A	G	23349	29782	S	D614G	SNP	Spike
EPI_ISL_425161	25563	G	T	25509	29782	ORF3a	Q57H	SNP	ORF3a protein
EPI_ISL_417477	127	G	T	73	29782	5'UTR	127	extragenic	NA
EPI_ISL_417477	8782	C	T	8728	29782	NSP4	S76S	SNP_silent	Transmembrane protein
EPI_ISL_417477	14322	C	T	14268	29782	NSP12b	Y285Y	SNP_silent	RNA-dependent RNA polymerase, post-ribosomal frameshift
EPI_ISL_417477	17747	C	T	17693	29782	NSP13	P504L	SNP	Helicase
EPI_ISL_417477	17858	A	G	17804	29782	NSP13	Y541C	SNP	Helicase
EPI_ISL_417477	24694	A	T	24640	29782	S	G1044G	SNP_silent	Spike
EPI_ISL_417477	28144	T	C	28090	29782	ORF8	L84S	SNP	ORF8 protein
EPI_ISL_417500	127	G	T	73	29782	5'UTR	127	extragenic	NA
EPI_ISL_417500	8782	C	T	8728	29782	NSP4	S76S	SNP_silent	Transmembrane protein
EPI_ISL_417500	14322	C	T	14268	29782	NSP12b	Y285Y	SNP_silent	RNA-dependent RNA polymerase, post-ribosomal frameshift
EPI_ISL_417500	17747	C	T	17693	29782	NSP13	P504L	SNP	Helicase
EPI_ISL_417500	17858	A	G	17804	29782	NSP13	Y541C	SNP	Helicase
EPI_ISL_417500	24694	A	T	24640	29782	S	G1044G	SNP_silent	Spike
EPI_ISL_417500	28144	T	C	28090	29782	ORF8	L84S	SNP	ORF8 protein
EPI_ISL_422620	127	G	T	73	29775	5'UTR	127	extragenic	NA
EPI_ISL_422620	241	C	T	187	29775	5'UTR	241	extragenic	NA
EPI_ISL_422620	1059	C	T	1005	29775	NSP2	T85I	SNP	Non-Structural protein 2
EPI_ISL_422620	1537	T	C	1483	29775	NSP2	V244V	SNP_silent	Non-Structural protein 2
EPI_ISL_422620	3037	C	T	2983	29775	NSP3	F106F	SNP_silent	Predicted phosphoesterase, papain-like proteinase
EPI_ISL_422620	13006	T	C	12952	29775	NSP9	A107A	SNP_silent	ssRNA-binding protein
EPI_ISL_422620	14408	C	T	14354	29775	NSP12b	P314L	SNP	RNA-dependent RNA polymerase, post-ribosomal frameshift
EPI_ISL_422620	23403	A	G	23349	29775	S	D614G	SNP	Spike
EPI_ISL_422620	24378	C	T	24324	29775	S	S939F	SNP	Spike
EPI_ISL_422620	25563	G	T	25509	29775	ORF3a	Q57H	SNP	ORF3a protein
EPI_ISL_422620	25688	C	T	25634	29775	ORF3a	A99V	SNP	ORF3a protein
EPI_ISL_417349	140	C	T	84	29843	5'UTR	140	extragenic	NA
EPI_ISL_417349	4880	AGT	.	4823	29843	NSP3	S721	deletion	Predicted phosphoesterase, papain-like proteinase
EPI_ISL_417349	8782	C	T	8723	29843	NSP4	S76S	SNP_silent	Transmembrane protein
EPI_ISL_417349	12213	C	T	12154	29843	NSP8	S41F	SNP	Non-Structural Protein 8
EPI_ISL_417349	17747	C	T	17688	29843	NSP13	P504L	SNP	Helicase
EPI_ISL_417349	17858	A	G	17799	29843	NSP13	Y541C	SNP	Helicase
EPI_ISL_417349	18060	C	T	18001	29843	NSP14	L7L	SNP_silent	3'-to-5' exonuclease
EPI_ISL_417349	28144	T	C	28085	29843	ORF8	L84S	SNP	ORF8 protein
EPI_ISL_417365	140	C	T	66	29825	5'UTR	140	extragenic	NA
EPI_ISL_417365	4880	AGT	.	4805	29825	NSP3	S721	deletion	Predicted phosphoesterase, papain-like proteinase
EPI_ISL_417365	8782	C	T	8705	29825	NSP4	S76S	SNP_silent	Transmembrane protein
EPI_ISL_417365	17747	C	T	17670	29825	NSP13	P504L	SNP	Helicase
EPI_ISL_417365	17858	A	G	17781	29825	NSP13	Y541C	SNP	Helicase
EPI_ISL_417365	18060	C	T	17983	29825	NSP14	L7L	SNP_silent	3'-to-5' exonuclease
EPI_ISL_417365	19018	C	T	18941	29825	NSP14	P327S	SNP	3'-to-5' exonuclease
EPI_ISL_417365	28144	T	C	28067	29825	ORF8	L84S	SNP	ORF8 protein
EPI_ISL_417456	140	C	T	89	29845	5'UTR	140	extragenic	NA
EPI_ISL_417456	4642	G	A	4591	29845	NSP3	L641L	SNP_silent	Predicted phosphoesterase, papain-like proteinase
EPI_ISL_417456	4880	AGT	.	4828	29845	NSP3	S721	deletion	Predicted phosphoesterase, papain-like proteinase
EPI_ISL_417456	8782	C	T	8728	29845	NSP4	S76S	SNP_silent	Transmembrane protein
EPI_ISL_417456	12213	C	T	12159	29845	NSP8	S41F	SNP	Non-Structural Protein 8
EPI_ISL_417456	17747	C	T	17693	29845	NSP13	P504L	SNP	Helicase
EPI_ISL_417456	17858	A	G	17804	29845	NSP13	Y541C	SNP	Helicase
EPI_ISL_417456	18060	C	T	18006	29845	NSP14	L7L	SNP_silent	3'-to-5' exonuclease
[truncated: 61,421 more rows]
