# Supplementary material for: Geographic and Genomic Distribution of SARS-CoV-2 Mutations
Source: Preprints.org preprint supplement (doi:10.20944/preprints202004.0529.v1), 2020-04-30
Supplement: Supplementary file 5 [file SuppFile5_supptable.xlsx]

## Sheet: Sheet2
Mutation classes (sorted by number of events)
Class	nr. events
SNP	37141
SNP_silent	17788
extragenic	7612
deletion	542
SNP_stop	140
deletion_frameshift	135
insertion_frameshift	35
insertion	24
deletion_stop	3
Most frequent mutation types
Type	nr. events
C>T	33808
A>G	9422
G>T	8315
T>C	3859
G>A	2614
GGG>AAC	1773
A>T	510
C>A	506
T>A	460
ATG>.	412
G>C	395
T>G	280
A>C	259
C>G	87
T>.	46
TG>AA	43
G>.	35
A>.	32
AAGTCATTT>.	32
C>.	27
Most frequent specific events (by genome coordinate)
Event	nr. occurrences
A23403G	5935
C3037T	5933
C14408T	5908
C241T	5785
G25563T	2125
GGG28881AAC	1773
C1059T	1731
G11083T	1585
C14805T	1372
G26144T	1312
C8782T	1289
T28144C	1276
C18060T	796
A17858G	786
C17747T	765
C2558T	564
A2480G	524
T17247C	445
ATG1605. (deletion)	406
G1440A	370
